# Supplementary material for: Communication, Coordination, and Security for People with Multiple Sclerosis (COCOS-MS): a randomised phase II clinical trial protocol
Source: HighWire-hosted journal article supplement (doi:10.1136/bmjopen-2021-049300), 2022-01-01
Supplement: bmjopen-2021-049300supp001_data_supplement.pdf [file bmjopen-2021-049300supp001_data_supplement.pdf]

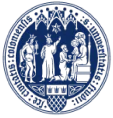**UNIKLINIK  
KÖLN****Zentrum für  
Palliativmedizin****Studienleitung:**

PD Dr. Heidrun Golla  
Zentrum für Palliativmedizin  
Uniklinik Köln

**Ansprechpartnerin:**

Dr. Veronika Dunkl  
Zentrum für Palliativmedizin  
Uniklinik Köln  
Tel.: 0221-478-50989  
E-Mail: veronika.dunkl@uk-koeln.de

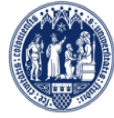**UNIKLINIK  
KÖLN****Klinik und Poliklinik  
für Neurologie****Stellvertretende Studienleitung:**

PD Dr. Clemens Warnke  
Klinik und Poliklinik für Neurologie  
Uniklinik Köln

**Die Verantwortung für die Studie liegt bei:**

PD Dr. Heidrun Golla  
Zentrum für Palliativmedizin  
Uniklinik Köln  
Kerpener Str. 62, 50937 Köln  
Tel.: 0221-478-3368  
E-Mail: heidrun.golla@uk-koeln.de

**Lokal verantwortliche Studienärzte<sup>1</sup> am Studienzentrum (jeweils am Zentrum für Palliativmedizin und der Klinik und Poliklinik für Neurologie):**

PD Dr. Heidrun Golla  
Zentrum für Palliativmedizin  
Uniklinik Köln  
Kerpener Str. 62, 50937 Köln  
Tel.: 0221-478-3368  
E-Mail: heidrun.golla@uk-koeln.de

PD Dr. Clemens Warnke  
Klinik und Poliklinik für Neurologie  
Uniklinik Köln  
Kerpener Str. 62, 50937 Köln  
Tel.: 0221-478-6188  
E-Mail: clemens.warnke@uk-koeln.de

**Information über die Teilnahme an der Studie**

Sehr geehrte Patientin, sehr geehrter Patient,

wir freuen uns, dass Sie an unserer Studie zur „Kommunikation, Koordination und Sicherheit für Menschen mit Multipler Sklerose (KOKOS-MS)“ interessiert sind und uns eventuell durch Ihre Teilnahme hierbei unterstützen möchten. Im Folgenden möchten wir Sie über die Ziele und den Verlauf der Studie informieren und Ihnen erklären, warum Ihre Mitarbeit im Falle einer Studienteilnahme wichtig ist. Die Studie wird zu Forschungszwecken durchgeführt.

<sup>1</sup> Im Interesse einer besseren Lesbarkeit wird nicht ausdrücklich in geschlechtsspezifischen Personenbezeichnungen differenziert. Die gewählte männliche Form schließt eine adäquate weibliche Form gleichberechtigt ein.

Wir bitten Sie, diese Information sorgfältig zu lesen und anschließend zu entscheiden, ob Sie an dieser Studie teilnehmen möchten oder nicht.

Ihre Teilnahme an dieser Studie ist freiwillig. Sie werden in diese Studie also nur dann einbezogen, wenn Sie dazu schriftlich Ihre Einwilligung erklären. Sofern Sie nicht an der Studie teilnehmen oder später Ihre Einwilligung widerrufen, entstehen Ihnen daraus keine Nachteile.

Der Studienarzt hat Ihnen bereits eine Reihe von Informationen zu der geplanten Studie gegeben. Der nachfolgende Text soll Sie über die wichtigen Aspekte der Studie, insbesondere die Ziele und den Ablauf informieren. Lesen Sie die Teilnehmerinformation bitte sorgfältig und gewissenhaft. Anschließend wird ein Studienarzt das Aufklärungsgespräch mit Ihnen führen. Bitte zögern Sie nicht, alle Punkte anzusprechen, die Ihnen unklar sind. Sie werden danach ausreichend Bedenkzeit erhalten, um über Ihre Teilnahme zu entscheiden.

### **Ziel der Studie**

Studien und eigene klinische Erfahrungen zeigen, dass schwer betroffene MS Patienten und ihre An-/Zugehörigen (im Folgenden als Bezugspersonen bezeichnet) oftmals einen kontinuierlichen koordinierenden Ansprechpartner vermissen, der gemeinsam mit ihnen ihre Bedarfe definiert und ordnet, sich für ihre Belange einsetzt und verschiedene Abläufe koordiniert, im Sinne einer „Prozesskoordination“. Solche Aufgaben können durch einen sogenannten „Fallmanager“ übernommen werden. Seine Tätigkeit wird auch als „Care und Case Management“ bezeichnet und konnte bereits für verschiedene Patientengruppen die Koordinationsabläufe vereinfachen, Lebensqualität verbessern und Sozial- und Gesundheitskosten senken. Bisher fehlt der Nachweis dieser positiven Effekte jedoch für schwer betroffene MS Patienten sowie für deren Bezugspersonen. Ziel dieser Studie ist die Evaluation eines solchen Care und Case Management Dienstes bei schwerer MS, der die Patienten und deren Bezugspersonen über einen längeren Zeitraum (in dieser Studie über 12 Monate) in Gesundheits- und Sozialversorgungsbelangen begleitet. Hierbei sollen Anliegen der Patienten aber auch der Bezugspersonen Berücksichtigung finden. Dies erfolgt sektorenübergreifend, d.h. unabhängig davon, ob sich Patienten gerade ambulant oder stationär in Behandlung befinden. Von der Durchführung dieser Studie erhoffen wir uns, die Versorgung der MS Patienten und deren Bezugspersonen zukünftig verbessern zu können.

### **Art der Studie**

Bei der Studie handelt es sich um eine sogenannte „randomisierte kontrollierte Phase II klinische Studie“ im Sinne einer komplexen Intervention mit parallelen Armen. Dies bedeutet, dass Sie und Ihre Bezugspersonen computergestützt zufällig entweder der Kontroll- oder der Interventionsgruppe (s. unten für eine genauere Beschreibung beider Gruppen) zugewiesen werden. Dieses Verfahren wird **Randomisierung** genannt und ist vergleichbar mit dem Werfen einer Münze (Wahrscheinlichkeit von 50%). Das Studienteam hat keinen Einfluss darauf, ob Sie der Interventionsgruppe oder der Kontrollgruppe zugeordnet werden.

In der **Kontrollgruppe** erhalten die Patienten die Regelversorgung innerhalb der bestehenden Gesundheits- und Sozialstrukturen.

In der **Interventionsgruppe** erhalten die Patienten gemeinsam mit den Bezugspersonen – falls teilnehmend- zusätzlich zur Regelversorgung regulär strukturierte Kontakte mit einem kontinuierlich über die Studie begleitendem Fallmanager.

Sie und Ihre Bezugsperson (falls eine solche Person an der Studie teilnimmt) sowie Ihre Behandler sind darüber informiert, in welcher Gruppe (Kontroll- oder Interventionsgruppe) Sie sich befinden. Der geschulte Studienmitarbeiter, der sich regelmäßig mit Ihnen und Ihrer Bezugsperson treffen wird, um sich mit Hilfe von Fragebögen nach Ihrem Befinden zu erkundigen, ist jedoch „verblindet“ (**Beobachter-blinde Studie**). Das heißt, der Studienmitarbeiter weiß nicht, ob Sie sich in der Interventions- oder in der Kontrollgruppe befinden. Es ist wichtig, dass der Studienmitarbeiter zu jedem Zeitpunkt der Studie verblindet bleibt, d.h., Sie dürfen ihm also nicht mitteilen, ob Sie in der Kontrollgruppe oder in der Interventionsgruppe sind. Das bedeutet auch, dass in seiner Anwesenheit nicht über den Kontakt mit dem Fallmanager berichtet werden darf. Sie werden vor jedem Termin darauf hingewiesen und erinnert werden.

Der Studienablauf ist in Abbildung 1 unter „geplante Maßnahmen und Ablauf der Teilnahme“ dargestellt und genauer beschrieben.

Die Studie wird unter dem Förderkennzeichen 01VSF19029 vom Innovationsausschuss beim Gemeinsamen Bundeauschuss (GBA) gefördert.

Die Ethikkommission der Medizinischen Fakultät zu Köln hat die vorliegende Studie am 19.11.2020 beraten und zustimmend bewertet.

### Wer kann an der Studie teilnehmen?

An dieser wissenschaftlichen Studie können Patienten teilnehmen, die die in der Tabelle gelisteten Einschlusskriterien erfüllen und ihr schriftliches Einverständnis zur Teilnahme an der Studie geben oder das ihres Vorsorgebevollmächtigten oder gesetzlichen Betreuers, sofern die Patienten selbst nicht in der Lage sein sollten, ihr schriftliches Einverständnis zu geben.

Nicht teilnehmen können Patienten mit den in der Tabelle gelisteten Ausschlusskriterien.

Die geplante Laufzeit dieses Vorhabens beträgt für die einzelnen Patienten und deren Bezugspersonen insgesamt 15 Monate. Insgesamt erstreckt sich die Studienlänge über 40 Monate und wird voraussichtlich Ende 2023 abgeschlossen sein. Es sollen insgesamt 80 Patienten mit schwerer MS sowie deren Bezugspersonen (sofern vorhanden und einverstanden) in die Studie eingeschlossen werden.

| <b>Einschlusskriterien</b>                                                            |                                                                   |
|---------------------------------------------------------------------------------------|-------------------------------------------------------------------|
| <b>Subgruppe 1</b>                                                                    | <b>Subgruppe 2</b>                                                |
| MS Patienten, die aufgrund eines hochaktiven Verlaufs, charakterisiert über klinische | MS Patienten, mit primär oder sekundär chronisch progredienter MS |

|                                                                                                                                                                                                                                                                                                                                                                                                                                                                                                                                                                                           |                                                                                                                                                                                        |                                                                                                           |
|-------------------------------------------------------------------------------------------------------------------------------------------------------------------------------------------------------------------------------------------------------------------------------------------------------------------------------------------------------------------------------------------------------------------------------------------------------------------------------------------------------------------------------------------------------------------------------------------|----------------------------------------------------------------------------------------------------------------------------------------------------------------------------------------|-----------------------------------------------------------------------------------------------------------|
| Schubaktivität und MRT-Aktivität, eine Indikation für ein Immuntherapeutikum der Eskalationsstufe (z.B. Alemtuzumab, Ocrelizumab, Rituximab, Ofatumumab, Natalizumab, Fingolimod, Siponimod, Ozanimod, Cladribin) haben und hiermit behandelt werden                                                                                                                                                                                                                                                                                                                                      |                                                                                                                                                                                        |                                                                                                           |
| <b>UND</b> mindestens einer der beiden nachfolgenden Punkte zutreffend                                                                                                                                                                                                                                                                                                                                                                                                                                                                                                                    | <b>UND</b>                                                                                                                                                                             |                                                                                                           |
| <ul style="list-style-type: none"> <li>Alter ≥ 50 Jahre</li> <li>expanded disability status score (EDSS) ≥ 5</li> </ul>                                                                                                                                                                                                                                                                                                                                                                                                                                                                   | Alter ≥ 18 Jahre                                                                                                                                                                       |                                                                                                           |
|                                                                                                                                                                                                                                                                                                                                                                                                                                                                                                                                                                                           | <b>UND entweder a oder b zutreffend</b>                                                                                                                                                |                                                                                                           |
|                                                                                                                                                                                                                                                                                                                                                                                                                                                                                                                                                                                           | <b>a</b><br>mäßig ausgeprägter Behinderung (EDSS 4-7) und keine immuntherapeutischen Behandlungsoptionen (z.B. aufgrund fehlender Krankheitsaktivität in Form von Schüben oder im MRT) | <b>b</b><br>ausgeprägte Behinderungen (EDSS > 7,0), mit oder ohne immuntherapeutische Behandlungsoptionen |
| <b>UND</b>                                                                                                                                                                                                                                                                                                                                                                                                                                                                                                                                                                                |                                                                                                                                                                                        |                                                                                                           |
| Wohnort im Regierungsbezirk Köln                                                                                                                                                                                                                                                                                                                                                                                                                                                                                                                                                          |                                                                                                                                                                                        |                                                                                                           |
| <b>UND</b> einer der beiden nachfolgenden Punkte zutreffend                                                                                                                                                                                                                                                                                                                                                                                                                                                                                                                               |                                                                                                                                                                                        |                                                                                                           |
| <ul style="list-style-type: none"> <li>Die Patienten sind der deutschen Sprache mächtig (verstehen, lesen, antworten) und sind in der Lage zur informierten, schriftlichen Einwilligung.</li> </ul> <p style="text-align: center;"><b>ODER</b></p> <ul style="list-style-type: none"> <li>Wenn der Patient dazu nicht in der Lage ist, gibt es einen Vorsorgebevollmächtigten / gesetzlichen Betreuer, der der deutschen Sprache mächtig ist (verstehen, lesen, antworten) und in der Lage zur informierten, schriftlichen Einwilligung stellvertretend für den Patienten ist.</li> </ul> |                                                                                                                                                                                        |                                                                                                           |
| <b>Ausschlusskriterien</b>                                                                                                                                                                                                                                                                                                                                                                                                                                                                                                                                                                |                                                                                                                                                                                        |                                                                                                           |
| <ul style="list-style-type: none"> <li>Fehlendes Einverständnis, sich an das Studienprotokoll zu halten.</li> <li>Bestehender Drogenmissbrauch, Alkoholmissbrauch oder eine psychiatrische Erkrankung, die nach Ansicht des aufklärenden Arztes den Patienten für die Teilnahme an einer Studie ungeeignet macht.</li> </ul>                                                                                                                                                                                                                                                              |                                                                                                                                                                                        |                                                                                                           |

- Jede Art von Abhängigkeit vom Prüfer oder vom Sponsor (einschließlich dort angestellt zu sein).

**Hinweis:** Sie dürfen, unabhängig von i) der Teilnahme Ihrer Bezugsperson und ii) anderen Diagnosen an der Studie teilnehmen (mit Ausnahme der unter Ausschlusskriterien genannten)

### **Mögliche Risiken/Belastungen/Nebenwirkungen, die mit der Teilnahme verbunden sind**

Unerwünschte Nebenwirkungen sind unter Beachtung der Ausschlusskriterien, welche durch den einschließenden Studienarzt geprüft werden, nicht zu erwarten.

Mögliche Aspekte, die Sie oder Ihre Bezugsperson belasten, werden unabhängig davon, ob Sie in der Interventions- oder Kontrollgruppe versorgt werden, alle drei Monate durch die reguläre Ergebnismessung erfasst. Kritische Aspekte werden an Ihre Primärbehandler (z.B. Hausarzt, Fachärzte, Therapeuten) weitergegeben werden, so dass diese die Möglichkeit haben, hierauf zeitnah zu reagieren. Natürlich können Sie die jeweilige Befragung / das Interview auch jederzeit ohne Angabe von Gründen vorzeitig beenden.

Die Teilnahme an der Studie ist mit einem Zeitaufwand für Sie verbunden. Insgesamt schätzen wir den zeitlichen Gesamtaufwand mit regulär ca. 1-1,5 Stunden pro Erhebung der Fragebögen (Baseline; Monate 3, 6, 9, 12, 15 in Form von Kontakten im persönlichen Gegenüber bei Ihnen vor Ort) für Sie als zumutbar ein. Falls Sie sich nicht dazu in der Lage sehen, ist es möglich, dass ein Stellvertreter, der Sie gut kennt (z.B. Ihre Bezugsperson oder Ihre Pflegekraft) anstelle von Ihnen die Fragebögen ausfüllt. Die Care und Case Management Intervention erfolgt bei Ihnen vor Ort bzw. telefonisch. Für keinen der studienbedingten Termine ist eine zusätzliche Anreise von Ihnen erforderlich. Die Treffen / Telefonate mit dem Fallmanager werden jedoch - je nach Bedürfnislage - jeweils auch 0,5-2 Stunden in Anspruch nehmen. Eine mögliche Teilnahme an einem persönlichen Interview wird ungefähr 30-60 Minuten dauern.

### **Möglicher Nutzen durch die Teilnahme**

Die Care und Case Management Intervention ist darauf ausgerichtet, den Bedürfnissen von Ihnen und Ihrer Bezugsperson so gut wie möglich zu begegnen und engmaschigen Kontakt zu Ihren Behandlern zu halten. Unsere Erwartung ist, dass es für die Patienten und deren Bezugspersonen durch die gezielte Begegnung der Gesundheits- und Sozialversorgungsbelange mit Übernahme der Koordinationsabläufe, zu einer Verbesserung der Lebensqualität, Linderung der Symptomlast, verbesserten Risikowahrnehmung im Falle von Immuntherapien und nicht zuletzt durch eine gezieltere Nutzung von Angeboten der Gesundheits- und Sozialversorgung auch zu einer Verminderung von Sozial- und Gesundheitskosten kommt. Dies ist jedoch für schwer betroffene MS Patienten mit komplexen Bedürfnissen noch nicht bewiesen. Daher werden sie möglicherweise keinen persönlichen Nutzen durch die Teilnahme an der Studie haben. Durch die Teilnahme an der Studie sind Sie jedoch keinem zusätzlichen Risiko im Vergleich zu der Regelversorgung ausgesetzt.

In jedem Falle kann Ihre Teilnahme an der Studie dazu beitragen, dass neue und wichtige Erkenntnisse über den Nutzen einer Care und Case Management Intervention gewonnen werden. Diese Erkenntnisse können Ihnen und anderen Patienten und Bezugspersonen perspektivisch helfen.

## Geplante Maßnahmen und Ablauf der Teilnahme

Der Studieneinschluss erfolgt nach einer ausführlichen Bereitstellung von Informationen und der Aufklärung durch einen Studienarzt der Klinik und Poliklinik für Neurologie oder des Zentrums für Palliativmedizin der Uniklinik Köln. Hierzu wird einer der Studienärzte Sie dort aufsuchen, wo Sie sich gerade befinden (z.B. in der Klinik (ambulant/stationär), zu Hause).

Nach dem schriftlichen Einverständnis (s. Abschnitt „Wer kann an der Studie teilnehmen?“) erfolgt die Basisuntersuchung (Baseline) durch einen geschulten Studienmitarbeiter. Die Basisuntersuchung findet dort statt, wo Sie sich befinden, z.B. bei Ihnen zu Hause und besteht aus der Beantwortung verschiedener Fragebögen zu folgenden Bereichen: soziodemographische Daten, Lebensqualität, palliativmedizinische Beschwerden und Bedürfnisse, Selbstbeurteilung von Angst und Depression, subjektive Wahrnehmung zur Therapiesicherheit von Immuntherapien und Erfassung der Nutzung von Angeboten gesundheitsbezogener Leistungen.

Im Anschluss erfolgt die Randomisierung in die Kontroll- oder Interventionsgruppe (s. Abschnitt „Art der Studie“).

In der **Interventionsgruppe** findet der erste Kontakt mit dem Fallmanager zur Vorstellung und Erfassung der Sozial-/Gesundheitsbedarfe sobald als möglich nach der Basiserhebung statt. Zwischen Studieneinschluss und erstem Kontakt mit dem Fallmanager sollte so wenig Zeit wie möglich, maximal jedoch 2 Wochen vergehen. Nach dem ersten persönlichen Kontakt findet anschließend jede Woche ein Kontakt per Telefon bzw. ein persönlicher Kontakt alle 4 Wochen ( $\pm 3$  Tage) durch einen Besuch am Standort von Ihnen / Ihrer Bezugsperson statt. Ziel der Intervention ist es, einen auf die Patienten und ihre Bezugspersonen individuell abgestimmten Handlungs- und Maßnahmenplan zu erstellen, der auf Gesundheits- und Sozialversorgungsbelangen abzielt. Hierzu zählen z.B. folgende Maßnahmen: Herstellung und Koordination von Kontakten zu professionellen Helfern des Gesundheitssystems, Hilfe bei Klärung von Fragen mit der Kranken-/Rentenversicherung, Koordination von z.B. immuntherapeutischen Behandlungen. Die Dauer der Intervention beträgt 12 Monate.

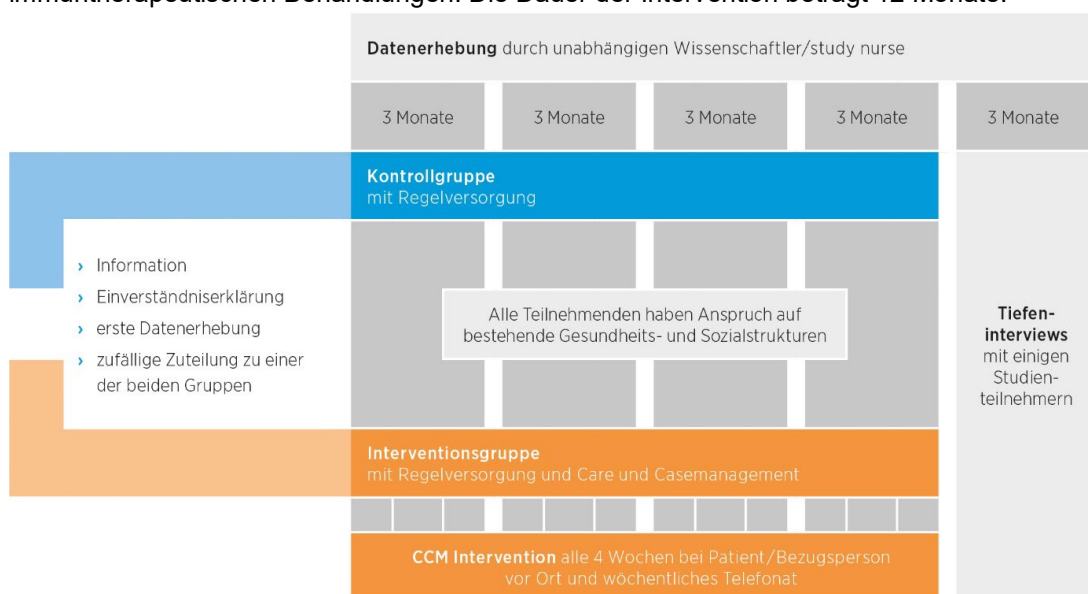

**Abbildung 1:** Flussdiagramm Studienverlauf, Abkürzungen: Care und Case Management (CCM)

Alle Patienten und teilnehmenden Bezugspersonen -unabhängig davon, ob Sie in der Kontroll- oder in der Interventionsgruppe sind- werden alle 3 Monate von einem geschulten Studienmitarbeiter dort, wo Sie sich befinden (z.B. zu Hause), aufgesucht. Er füllt mit Ihnen zusammen die verschiedenen Fragebögen aus (alle unter „Geplante Maßnahmen und Ablauf der Teilnahme“ genannten, bis auf zwei, die nur einmalig zu Beginn erhoben werden). Insgesamt erfolgen nach der Basiserhebung also noch 5 weitere persönliche Treffen zwischen Ihnen und dem geschulten Studienmitarbeiter. Das letzte Treffen dient der Nachbeobachtung (sogenanntes „Follow-up“).

Wir möchten die Belastung für Sie und Ihre Bezugsperson durch die Studie möglichst geringhalten. Daher brauchen Sie wegen der Studie nicht extra in die Klinik zu kommen, sondern alle Studientermine werden dort stattfinden, wo Sie und Ihre Bezugsperson sich zu der Zeit befinden. Falls Ihr Allgemeinzustand die Beantwortung der Fragen nicht zulassen sollte, können die Fragebögen, die Sie betreffen, stellvertretend durch Ihre Bezugsperson beantwortet werden.

Ca. 12 Monate nach Einschluss des ersten Patienten werden wir jeweils 9-12 Patienten und 9-12 Bezugspersonen aus der Interventionsgruppe bitten, zusätzlich an einem persönlichen Interview teilzunehmen. Gegebenenfalls würden wir Sie also zu einem späteren Zeitpunkt noch einmal kontaktieren, um mit Ihnen einen Termin für ein persönliches Interview zu vereinbaren. In diesen Interviews haben die Patienten und ihre Bezugsperson die Gelegenheit, ihre ganz individuellen Erfahrungen mit dem neuen Care und Case Management Dienst zu vertiefen. Dieses Interview wird jeweils dort stattfinden, wo sich die Patienten bzw. die Bezugspersonen befinden. Zu Analysezwecken wird das Interview auf Tonband aufgezeichnet und wörtlich in einen Text überführt (Transkription) werden.

Nach Studienende oder auch bei freiwilligem Rücktritt von der Studienteilnahme steht Ihnen weiterhin die Regelversorgung durch bestehende Gesundheits- und Sozialstrukturen zur Verfügung.

### **Datenverarbeitung und Datenschutz**

Während der klinischen Studie werden medizinische Befunde und persönliche Informationen von Ihnen erhoben und am Studienzentrum in Ihrer persönlichen Akte niedergeschrieben oder elektronisch gespeichert. Die für die klinische Studie wichtigen Daten werden in pseudonymisierter Form gespeichert und wissenschaftlich nach Good Scientific Practice ausgewertet.

Pseudonymisieren bedeutet, dass die personenbezogenen Daten wie der Name und das Geburtsdatum ohne Hinzuziehung einer Codeliste nicht mehr einer konkreten Person zugeordnet werden können. Die personenbezogenen Daten werden durch einen Nummern- und/oder Buchstabencode ersetzt. Im Studienzentrum ist eine Liste hinterlegt (elektronisch und in Papierform), auf der die Namen den Nummern- und/oder Buchstabencodes zugeordnet sind. Diese Liste wird im Studienzentrum gesondert und unter Verschluss bzw. zugriffsbeschränkt aufbewahrt und unterliegt dort technischen und organisatorischen Maßnahmen, die gewährleisten, dass die personenbezogenen Daten Ihnen durch unbefugte Personen nicht zugeordnet werden können. Eine Entschlüsselung erfolgt nur unter den vom Gesetz vorgeschriebenen Voraussetzungen. Zugriff auf diese Listen haben nur zuständige und zur Verschwiegenheit verpflichtete Mitarbeiter des Studienzentrums.

Die Rechtsgrundlage für die Datenverarbeitung ist Ihre freiwillige, schriftliche Einwilligung.

Die im Rahmen der Studie erhobenen Daten werden von einem elektronischen Datensystem erfasst und statistisch ausgewertet. Nach Beendigung der Studie werden alle Daten über einen Zeitraum von 10 Jahren gemäß wissenschaftlichem Standard in einem sicheren System gespeichert und archiviert. Im Anschluss werden Ihre Daten gelöscht oder anonymisiert. Anonymisiert heißt, dass der Zuordnungscode gelöscht wird und die Daten ggf. so weiter verändert werden, dass sie in keiner Weise Ihrer Person zugeordnet werden können.

Die Verarbeitung der erhobenen Daten erfolgt in Verantwortung der Studienleitung (s. Seite 1).

Sie haben das Recht auf Auskunft sowie Einsichtnahme über die Sie betreffenden personenbezogenen Daten, die im Rahmen der Studie erhoben, verarbeitet oder ggf. an Dritte übermittelt werden.

Sollten Sie dabei Fehler in Ihren Daten feststellen, so haben Sie das Recht, diese berichtigen zu lassen. Ferner haben Sie das Recht eine kostenfreie Kopie dieser Daten zu erhalten.

Sie haben auch das Recht, eine Löschung der über Sie gespeicherten Daten zu verlangen.

Die Daten werden zu jeder Zeit vertraulich behandelt. Die pseudonymisierten Daten werden der Studienleitung in pseudonymisierter Form bzw. von ihr beauftragten Stellen zum Zweck des Datenmanagements (Zentrum für klinische Studien der Universität zu Köln) bzw. der wissenschaftlichen Auswertung (Institut für Medizinische Statistik und Bioinformatik der Universität zu Köln, Institut für Gesundheitsökonomie und Klinische Epidemiologie der Universität zu Köln) zur Verfügung gestellt. Zugriff auf die personenbezogenen und -identifizierenden Daten haben nur die zuständigen Personen im Studienzentrum. Diese unterliegen der ärztlichen Schweigepflicht (§ 203 StGB) und sind an die Wahrung des Datengeheimnisses (§6 DSGVO NRW) gebunden.

Wissenschaftliche Veröffentlichungen von Ergebnissen erfolgen ausschließlich anonymisiert, also in einer Form, die keine Rückschlüsse auf Ihre Person zulässt.

Die ordnungsgemäße Durchführung der Studie, insbesondere die ordnungsgemäße Erhebung der Daten sowie deren Zuordnung zu bestimmten Teilnehmer, können von Beauftragten der Studienleitung, Hilfspersonal der Prüfer und Beauftragten des Sponsors (Monitore, Auditoren) und Inspektoren auch durch direkte Einsicht in Ihre beim Studienarzt vorliegenden personenbezogenen (d.h. in Verbindung mit Ihrem Namen genannten) Daten überprüft werden. Diese sind zur Verschwiegenheit verpflichtet und dürfen Ihre Daten nur in pseudonymisierter Form weitergeben und keine Kopien oder Abschriften von Ihren Unterlagen erstellen.

### **Sind mit der Datenverarbeitung Risiken verbunden?**

Bei jeder Erhebung, Speicherung, Nutzung und Übermittlung von Daten bestehen Vertraulichkeitsrisiken (z.B. die Möglichkeit, die betreffende Person zu identifizieren). Diese Risiken lassen sich nicht völlig ausschließen und steigen, je mehr Daten miteinander verknüpft



werden können. Die Studienleitung versichert Ihnen, alles nach dem Stand der Technik Mögliche zum Schutz Ihrer Privatsphäre zu tun und Daten nur an Stellen weiterzugeben, die ein geeignetes Datenschutzkonzept vorweisen können. Medizinische Risiken sind mit der Datenverarbeitung nicht verbunden.

Betrifft nur das Interview: Wir erstellen eine Tonbandaufnahme vom Gespräch und lassen es anschließend wörtlich verschriftlichen (Transkription). Dabei werden die Aufzeichnungen mit einem Ersatznamen versehen, damit die Inhalte nicht mit Ihrer Person in Verbindung gebracht werden können. Wir weisen Sie jedoch darauf hin, dass insbesondere aufgrund Ihrer Stimme und ggf. der ausgesprochenen Inhalte eine Re-Identifizierung nicht ausgeschlossen werden kann. Die Tonaufnahme des Interviews ist lediglich projektinternen Mitarbeitern des Studienzentrums zugänglich sowie der professionell transkribierenden Person, die vor Erhalt der Tonbandaufnahme eine Vertraulichkeitserklärung unterschreibt und das Transkript nach Erstellung an das Forschungsteam, ohne eine Vervielfältigung vorgenommen zu haben, zurückgibt. Die Tonbandaufnahmen sowie die Transkripte werden nur für die Auswertung der Untersuchung genutzt. Sie werden ebenfalls mit einer zufälligen Kennnummer (Pseudonymisierung) gespeichert. Alle Personen-, Orts- und Straßennamen werden durch die Bezeichnung „Ort X“ oder „Straße XY“ unkenntlich genannt. Einzelne Zitate werden möglicherweise in wissenschaftlichen Arbeiten veröffentlicht, dabei ist nicht erkennbar, von welcher Person diese stammen.

Für die Sicherheit und Instandhaltung der elektronischen Infrastruktur am Studienzentrum ist IT-Abteilung der UKK (UK-IT) zuständig.

### **Kann ich meine Einwilligung widerrufen?**

Sie können Ihre jeweilige Einwilligung jederzeit ohne Angabe von Gründen schriftlich oder mündlich widerrufen, ohne dass Ihnen daraus ein Nachteil entsteht. Wenn Sie Ihre Einwilligung widerrufen, werden keine weiteren Daten mehr erhoben.

### **Welche weiteren Rechte habe ich bezogen auf den Datenschutz?**

Bei Anliegen zur Datenverarbeitung und zur Einhaltung der datenschutzrechtlichen Anforderungen sollten Sie sich in erster Linie an die Studienleitung (siehe Seite 1) wenden. Sie können Sie sich auch an folgende Datenschutzbeauftragte wenden:

Datenschutzbeauftragter der Universität zu Köln  
dsb@verw.uni-koeln.de  
0221-470-0

Datenschutzbeauftragter der Uniklinik Köln  
datenschutz@uk-koeln.de  
0221-478-39046

Sie haben außerdem ein Beschwerderecht bei jeder Aufsichtsbehörde für den Datenschutz. Eine Liste der Aufsichtsbehörden in Deutschland finden Sie unter

[https://www.bfdi.bund.de/DE/Infothek/Anschriften\\_Links/anschriften\\_links-node.html](https://www.bfdi.bund.de/DE/Infothek/Anschriften_Links/anschriften_links-node.html)

Die für die Studienleitung zuständige Datenschutzaufsichtsbehörde ist:

Landesbeauftragte für Datenschutz und Informationsfreiheit Nordrhein-Westfalen  
Postfach 20 04 44, 40102 Düsseldorf  
Kavalleriestraße 2-4, 40213 Düsseldorf  
Tel.: 0211-384-24-0  
Fax: 0211-384-24-10  
E-Mail: poststelle@ldi.nrw.de

### **Probandenversicherung**

Da weder studienbedingte Risiken für die Gesundheit bestehen, noch studienbedingte Wege anfallen (diese Studie wird bei Ihnen vor Ort bzw. telefonisch erfolgen), wurden für die Studie keine Probandenversicherung und keine Wegeunfallversicherung abgeschlossen.

### **Mögliche Gründe für ein vorzeitiges Studienende**

Der Sponsor hat das Recht, die Studie vorzeitig abubrechen, wenn es relevante medizinische oder ethische Bedenken gibt oder wenn der Abschluss der Studie nicht mehr praktikabel ist. Wenn eine solche Maßnahme ergriffen wird, werden die Gründe für den Abbruch der Studie dokumentiert.

Ein vorzeitiger Abbruch der Studie wird in Betracht gezogen, wenn:

- sich das Nutzen-Risiko-Verhältnis für die Studienteilnehmer deutlich ändert
- es nicht mehr ethisch vertretbar ist, die Studie weiter fortzusetzen
- es nicht mehr praktikabel ist, die Studie abzuschließen
- identische Studien bessere Ergebnisse hinsichtlich einer Care und Case Management Intervention oder der Standardversorgung für schwer betroffene MS Patienten und deren Bezugspersonen zeigen

Der Sponsor entscheidet in Absprache mit der Studienleitung, der stellvertretenden Studienleitung und dem Studienstatistiker über den Abbruch der Studie.

### **Aufwandsentschädigung und Kostenerstattung**

Eine Aufwandsentschädigung wird Ihnen für Ihre Teilnahme an der Studie nicht gezahlt.

Es entstehen Ihnen und Ihrer Krankenkasse keinerlei Kosten durch die Teilnahme an der Studie.

### **Information über neue Erkenntnisse**

Ihr Studienarzt wird Sie in einer angemessenen Frist auch über jede Änderung und weitere wichtige, während der Studie bekanntwerdende Informationen in Kenntnis setzen, die Ihre Einwilligung zur weiteren Teilnahme beeinflussen könnte.

**Haben Sie weitere Fragen?**

Sollten Sie noch weitere Fragen zum Ablauf der Studie, zum Datenschutz, zu Ihren Rechten, usw. haben, wenden Sie sich bitte an die studienbedingte Ansprechpartnerin. Die Kontaktdaten finden Sie auf der ersten Seite.

**Wir freuen uns sehr über Ihre Unterstützung und bedanken uns bereits jetzt für Ihre Zeit dieses Schreiben zu lesen.**

---

Frau PD Dr. Heidrun Golla  
Zentrum für Palliativmedizin  
Uniklinik Köln

Herr PD Dr. Clemens Warnke  
Klinik und Poliklinik für Neurologie  
Uniklinik Köln

**UNIKLINIK  
KÖLN**Zentrum für  
Palliativmedizin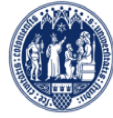**UNIKLINIK  
KÖLN**Klinik und Poliklinik  
für Neurologie**Studienleitung:**

PD Dr. Heidrun Golla  
Zentrum für Palliativmedizin  
Uniklinik Köln

**Stellvertretende Studienleitung:**

PD Dr. Clemens Warnke  
Klinik und Poliklinik für Neurologie  
Uniklinik Köln

**Ansprechpartnerin:**

Dr. Veronika Dunkl  
Zentrum für Palliativmedizin  
Uniklinik Köln  
Tel.: 0221-478-50989  
E-Mail: veronika.dunkl@uk-koeln.de

## Einwilligungserklärung

- Ich habe die Information erhalten und wurde über Wesen, Bedeutung, Tragweite und Risiken des geplanten Vorhabens informiert. Mir wurde ausreichend Gelegenheit gegeben, alle offenen Fragen zu klären. Ich habe jederzeit das Recht, weitere Informationen zur Studie zu erfragen.
- Ich erkläre mich freiwillig bereit, an der Studie teilzunehmen.
- Ich habe jederzeit das Recht, ohne Angabe von Gründen von der Studie zurückzutreten, ohne dass für mich Nachteile in der medizinischen Behandlung daraus entstehen.

## Einwilligungserklärung zum Datenschutz

Bei dieser wissenschaftlichen Studie werden personenbezogene Daten, insbesondere medizinische Daten über Sie erhoben und zugriffsbeschränkt am Studienzentrum aufbewahrt und die elektronisch erfassten Daten pseudonymisiert auf dem zentralen Studien-Datenserver am Zentrum für Klinische Studien (ZKS) der Medizinischen Fakultät der Universität zu Köln gespeichert werden. Die Speicherung, Weitergabe und Auswertung dieser Daten erfolgt gemäß gesetzlichen Bestimmungen und setzt vor Teilnahme an der Studie die folgende freiwillige Einwilligung voraus:

1. Ich erkläre mich damit einverstanden, dass im Rahmen dieser Studie erhobene Daten (auf Fragebögen und elektronischen Datenträgern) in pseudonymisierter Form (ohne Namensnennung) aufgezeichnet und weitergeben werden an:

- die Studienleitung oder eine von dieser beauftragten Stelle zum Zweck der wissenschaftlichen Auswertung
- im Falle von möglichen Aspekten, die Sie belasten könnten: die Studienärzte, die Studienleitung sowie involvierte Primärbehandler (z.B. Hausarzt, Fachärzte, Therapeuten), damit diese die Möglichkeit haben, auf diese Belastungsphänomene reagieren zu können (in diesem Fall werden Ihre personenbezogenen Daten, d.h. mit Namensnennung, weitergegeben)

2. Außerdem erkläre ich mich damit einverstanden, dass autorisierte und zur Verschwiegenheit verpflichtete Beauftragte der Studienleitung, Hilfspersonal der Prüfer und Beauftragte des Sponsors (Monitore, Auditoren) und Inspektoren in meine beim Studienarzt vorhandenen personenbezogenen Daten Einsicht nehmen können, soweit dies zur Überprüfung der Studie

**notwendig ist. Für diese Maßnahme entbinde ich den Studienarzt von der ärztlichen Schweigepflicht.**

**3. Ich erkläre mich damit einverstanden, dass meine Daten nach Beendigung oder Abbruch der Studie mindestens zehn Jahre nach Ende der Studie gemäß wissenschaftlichem Standard aufbewahrt werden. Danach werden meine personenbezogenen Daten gelöscht oder anonymisiert.**

**4. Ich bin darüber aufgeklärt worden, dass ich jederzeit die Teilnahme an der Studie beenden kann. In diesem Falle werden bereits erhobene Daten gelöscht oder vollständig anonymisiert.**

**5. Ich habe die Informationen zum Datenschutz zur Kenntnis genommen und willige in die Datenverarbeitung ein.**

**6. Ich bin damit einverstanden, dass Gesundheitsdaten von mitbehandelnden Ärzten erhoben werden, soweit dies für die ordnungsgemäße Durchführung und Überwachung der Studie notwendig ist. Insoweit entbinde ich diese Ärzte von der Schweigepflicht. (Falls nicht gewünscht, bitte streichen.)**

**7. Ich bin darüber informiert und damit einverstanden, dass im Rahmen der Studienteilnahme das Studienpersonal in seiner jeweils spezifischen Funktion zur Sicherung der adäquaten Durchführung der Studie sowie im Falle von identifizierten Bedürfnissen und/oder möglichen Aspekten, die Sie belasten könnten, mit meinen Primärbehandlern, z.B. meinem Hausarzt, Fachärzten, Therapeuten Kontakt aufnehmen wird.**

.....  
Name/n des/der Primärbehandler/s

Ja                       Nein

Ich habe die vollständige Patienteninformation zur Studie sowie ein unterschriebenes Exemplar dieser Einwilligungserklärung erhalten.

.....  
Vor- und Nachname des Patienten (in Druckbuchstaben)

.....  
Ort und Datum (persönlich auszufüllen)

.....  
Unterschrift des Patienten

Ich habe das Aufklärungsgespräch geführt und die Einwilligung des Patienten eingeholt.

.....  
Vor- und Nachname des Studienarztes (in Druckbuchstaben)

.....  
Ort und Datum (persönlich auszufüllen)

.....  
Unterschrift des Studienarztes

**UNIKLINIK  
KÖLN****Zentrum für  
Palliativmedizin****UNIKLINIK  
KÖLN****Klinik und Poliklinik  
für Neurologie****Studienleitung:**

PD Dr. Heidrun Golla  
Zentrum für Palliativmedizin  
Uniklinik Köln

**Stellvertretende Studienleitung:**

PD Dr. Clemens Warnke  
Klinik und Poliklinik für Neurologie  
Uniklinik Köln

**Ansprechpartnerin:**

Dr. Veronika Dunkl  
Zentrum für Palliativmedizin  
Uniklinik Köln  
Tel.: 0221-478-50989  
E-Mail: veronika.dunkl@uk-koeln.de

**Einwilligungserklärung (zum qualitativen Teil der Studie)**

- Ich habe die Information erhalten und wurde über Wesen, Bedeutung, Tragweite und Risiken des geplanten Vorhabens informiert. Mir wurde ausreichend Gelegenheit gegeben, alle offenen Fragen zu klären. Ich habe jederzeit das Recht, weitere Informationen zur Studie zu erfragen.
- Ich erkläre mich freiwillig bereit, an der Studie teilzunehmen.
- Ich habe jederzeit das Recht, ohne Angabe von Gründen von der Studie zurückzutreten, ohne dass für mich Nachteile in der medizinischen Behandlung daraus entstehen.

**Einwilligungserklärung zum Datenschutz**

Bei dieser wissenschaftlichen Studie werden personenbezogene Daten, insbesondere medizinische Daten über Sie erhoben und zugriffsbeschränkt am Studienzentrum aufbewahrt und die elektronisch erfassten Daten pseudonymisiert auf dem zentralen Studien-Datenserver am Zentrum für Klinische Studien (ZKS) der Medizinischen Fakultät der Universität zu Köln gespeichert werden. Die Speicherung, Weitergabe und Auswertung dieser Daten erfolgt gemäß gesetzlichen Bestimmungen und setzt vor Teilnahme an der Studie die folgende freiwillige Einwilligung voraus:

1. Ich erkläre mich damit einverstanden, dass im Rahmen dieser Studie erhobene Daten (auf Fragebögen und elektronischen Datenträgern) in pseudonymisierter Form (ohne Namensnennung) aufgezeichnet und weitergeben werden an:

- die Studienleitung oder eine von dieser beauftragten Stelle zum Zweck der wissenschaftlichen Auswertung
- im Falle von möglichen Aspekten, die Sie belasten könnten: die Studienärzte, die Studienleitung sowie involvierte Primärbehandler (z.B. Hausarzt, Fachärzte, Therapeuten), damit diese die Möglichkeit haben, auf diese Belastungsphänomene reagieren zu können (in diesem Fall werden Ihre personenbezogenen Daten, d.h. mit Namensnennung, weitergegeben)

2. Außerdem erkläre ich mich damit einverstanden, dass autorisierte und zur Verschwiegenheit verpflichtete Beauftragte der Studienleitung, Hilfspersonal der Prüfer und Beauftragte des Sponsors (Monitore, Auditoren) und Inspektoren in meine beim Studienarzt vorhandenen personenbezogenen Daten Einsicht nehmen können, soweit dies zur Überprüfung der Studie

**notwendig ist. Für diese Maßnahme entbinde ich den Studienarzt von der ärztlichen Schweigepflicht.**

**3. Ich erkläre mich damit einverstanden, dass meine Daten nach Beendigung oder Abbruch der Studie mindestens zehn Jahre nach Ende der Studie gemäß wissenschaftlichem Standard aufbewahrt werden. Danach werden meine personenbezogenen Daten gelöscht oder anonymisiert.**

**4. Ich bin darüber aufgeklärt worden, dass ich jederzeit die Teilnahme an der Studie beenden kann. In diesem Falle werden bereits erhobene Daten gelöscht oder vollständig anonymisiert.**

**5. Ich habe die Informationen zum Datenschutz zur Kenntnis genommen und willige in die Datenverarbeitung ein.**

**6. Ich bin damit einverstanden, dass Gesundheitsdaten von mitbehandelnden Ärzten erhoben werden, soweit dies für die ordnungsgemäße Durchführung und Überwachung der Studie notwendig ist. Insoweit entbinde ich diese Ärzte von der Schweigepflicht. (Falls nicht gewünscht, bitte streichen.)**

**7. Ich bin darüber informiert und damit einverstanden, dass im Rahmen der Studienteilnahme das Studienpersonal in seiner jeweils spezifischen Funktion zur Sicherung der adäquaten Durchführung der Studie sowie im Falle von identifizierten Bedürfnissen und/oder möglichen Aspekten, die Sie belasten könnten, mit meinen Primärbehandlern, z.B. meinem Hausarzt, Fachärzten, Therapeuten Kontakt aufnehmen wird.**

.....  
Name/n des/der Primärbehandler/s

**8. Ich bin ich damit einverstanden, dass das Interview auf Tonband aufgezeichnet wird und die Daten in pseudonymisierter Form (ohne Namensnennung) im Rahmen der Studie verwendet werden.**

**Ja**                 **Nein**

Ich habe die vollständige Patienteninformation zur Studie sowie ein unterschriebenes Exemplar dieser Einwilligungserklärung erhalten.

.....  
Vor- und Nachname des Patienten (in Druckbuchstaben)

.....  
Ort und Datum (persönlich auszufüllen)

.....  
Unterschrift des Patienten

Ich habe das Aufklärungsgespräch geführt und die Einwilligung des Patienten eingeholt.

.....  
Vor- und Nachname des Studienarztes (in Druckbuchstaben)

.....      .....

Ort und Datum (persönlich auszufüllen)

Unterschrift des Studienarztes



**UNIKLINIK  
KÖLN****Zentrum für  
Palliativmedizin**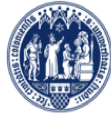**UNIKLINIK  
KÖLN****Klinik und Poliklinik  
für Neurologie****Studienleitung:**

PD Dr. Heidrun Golla  
Zentrum für Palliativmedizin  
Uniklinik Köln

**Stellvertretende Studienleitung:**

PD Dr. Clemens Warnke  
Klinik und Poliklinik für Neurologie  
Uniklinik Köln

**Ansprechpartnerin:**

Dr. Veronika Dunkl  
Zentrum für Palliativmedizin  
Uniklinik Köln  
Tel.: 0221-478-50989  
E-Mail: veronika.dunkl@uk-koeln.de

**Die Verantwortung für die Studie liegt bei:**

PD Dr. Heidrun Golla  
Zentrum für Palliativmedizin  
Uniklinik Köln  
Kerpener Str. 62, 50937 Köln  
Tel.: 0221-478-3368  
E-Mail: heidrun.golla@uk-koeln.de

**Lokal verantwortliche Studienärzte<sup>1</sup> am Studienzentrum (jeweils am Zentrum für Palliativmedizin und der Klinik und Poliklinik für Neurologie):**

PD Dr. Heidrun Golla  
Zentrum für Palliativmedizin  
Uniklinik Köln  
Kerpener Str. 62, 50937 Köln  
Tel.: 0221-478-3368  
E-Mail: heidrun.golla@uk-koeln.de

PD Dr. Clemens Warnke  
Klinik und Poliklinik für Neurologie  
Uniklinik Köln  
Kerpener Str. 62, 50937 Köln  
Tel.: 0221-478-6188  
E-Mail: clemens.warnke@uk-koeln.de

**Information über die Teilnahme an der Studie**

Sehr geehrter gesetzlicher Vertreter des Patienten,

wir freuen uns, dass Sie, stellvertretend für den von Ihnen vertretenen Patienten, an unserer Studie zur „Kommunikation, Koordination und Sicherheit für Menschen mit Multipler Sklerose (KOKOS-MS)“ interessiert sind und uns eventuell durch Ihre Teilnahme, stellvertretend für den von Ihnen vertretenen Patienten, hierbei unterstützen möchten. Im Folgenden möchten wir Sie über die Ziele und den Verlauf der Studie informieren und Ihnen erklären, warum Ihre Mitarbeit,

<sup>1</sup> Im Interesse einer besseren Lesbarkeit wird nicht ausdrücklich in geschlechtsspezifischen Personenbezeichnungen differenziert. Die gewählte männliche Form schließt eine adäquate weibliche Form gleichberechtigt ein.

stellvertretend für den von Ihnen vertretenen Patienten, im Falle einer Studienteilnahme wichtig ist. Die Studie wird zu Forschungszwecken durchgeführt.

Wir bitten Sie, diese Information sorgfältig zu lesen und anschließend zu entscheiden, ob Sie, stellvertretend für den von Ihnen vertretenen Patienten, an dieser Studie teilnehmen möchten oder nicht.

Ihre Teilnahme an dieser Studie, stellvertretend für den von Ihnen vertretenen Patienten, ist freiwillig. Sie und der von Ihnen vertretene Patient werden in diese Studie also nur dann einbezogen, wenn Sie, stellvertretend für den von Ihnen vertretenen Patienten, dazu schriftlich Ihre Einwilligung erklären. Sofern Sie, stellvertretend für den von Ihnen vertretenen Patienten, nicht an der Studie teilnehmen oder später Ihre Einwilligung widerrufen, entstehen Ihnen und dem von Ihnen vertretenen Patienten daraus keine Nachteile.

Der Studienarzt hat Ihnen bereits eine Reihe von Informationen zu der geplanten Studie gegeben. Der nachfolgende Text soll Sie über die wichtigen Aspekte der Studie, insbesondere die Ziele und den Ablauf informieren. Lesen Sie die Teilnehmerinformation bitte sorgfältig und gewissenhaft. Anschließend wird ein Studienarzt das Aufklärungsgespräch mit Ihnen führen. Bitte zögern Sie nicht, alle Punkte anzusprechen, die Ihnen unklar sind. Sie werden danach ausreichend Bedenkzeit erhalten, um über Ihre Teilnahme, stellvertretend für den von Ihnen vertretenen Patienten, zu entscheiden.

### **Ziel der Studie**

Studien und eigene klinische Erfahrungen zeigen, dass schwer betroffene MS Patienten und ihre An-/Zugehörigen (im Folgenden als Bezugspersonen bezeichnet) oftmals einen kontinuierlichen koordinierenden Ansprechpartner vermissen, der gemeinsam mit ihnen ihre Bedarfe definiert und ordnet, sich für ihre Belange einsetzt und verschiedene Abläufe koordiniert, im Sinne einer „Prozesskoordination“. Solche Aufgaben können durch einen sogenannten „Fallmanager“ übernommen werden. Seine Tätigkeit wird auch als „Care und Case Management“ bezeichnet und konnte bereits für verschiedene Patientengruppen die Koordinationsabläufe vereinfachen, Lebensqualität verbessern und Sozial- und Gesundheitskosten senken. Bislang fehlt der Nachweis dieser positiven Effekte jedoch für schwer betroffene MS Patienten sowie für deren Bezugspersonen. Ziel dieser Studie ist die Evaluation eines solchen Care und Case Management Dienstes bei schwerer MS, der die Patienten und deren Bezugspersonen über einen längeren Zeitraum (in dieser Studie über 12 Monate) in Gesundheits- und Sozialversorgungsbelangen begleitet. Hierbei sollen Anliegen der Patienten aber auch der Bezugspersonen Berücksichtigung finden. Dies erfolgt sektorenübergreifend, d.h. unabhängig davon, ob sich Patienten gerade ambulant oder stationär in Behandlung befinden. Von der Durchführung dieser Studie erhoffen wir uns, die Versorgung der MS Patienten und deren Bezugspersonen zukünftig verbessern zu können.

### **Art der Studie**

Bei der Studie handelt es sich um eine sogenannte „randomisierte kontrollierte Phase II klinische Studie“ im Sinne einer komplexen Intervention mit parallelen Armen. Dies bedeutet, dass der von Ihnen vertretene Patient gekoppelt mit der ggf. auch teilnehmenden Bezugsperson (das sind möglicherweise Sie als Vorsorgebevollmächtigter oder der gesetzlich bestellte Betreuer) computergestützt zufällig entweder der Kontroll- oder der

Interventionsgruppe (s. unten für eine genauere Beschreibung beider Gruppen) zugewiesen wird. Dieses Verfahren wird **Randomisierung** genannt und ist vergleichbar mit dem Werfen einer Münze (Wahrscheinlichkeit von 50%). Das Studienteam hat keinen Einfluss darauf, ob der von Ihnen vertretene Patient der Interventionsgruppe oder der Kontrollgruppe zugeordnet wird.

In der **Kontrollgruppe** erhalten die Patienten die Regelversorgung innerhalb der bestehenden Gesundheits- und Sozialstrukturen.

In der **Interventionsgruppe** erhalten die Patienten gemeinsam mit den Bezugspersonen – falls teilnehmend- zusätzlich zur Regelversorgung regulär strukturierte Kontakte mit einem kontinuierlich über die Studie begleitendem Fallmanager.

Sie, der von Ihnen vertretene Patient und dessen Bezugsperson (falls eine solche Person an der Studie teilnimmt) sowie die Behandler des von Ihnen vertretenden Patienten sind darüber informiert, in welcher Gruppe (Kontroll- oder Interventionsgruppe) der von Ihnen vertretene Patient sich befindet. Der geschulte Mitarbeiter, der sich regelmäßig mit Ihnen und der Bezugsperson des von Ihnen vertretenen Patienten treffen wird, um sich mit Hilfe von Fragebögen nach dem Befinden des von Ihnen vertretenen Patienten zu erkundigen, ist jedoch „verblindet“ (**Beobachter-blinde Studie**). Das heißt, der Studienmitarbeiter weiß nicht, ob der von Ihnen vertretende Patient sich in der Interventions- oder in der Kontrollgruppe befindet. Es ist wichtig, dass der Studienmitarbeiter zu jedem Zeitpunkt der Studie verblindet bleibt, d.h., Sie dürfen ihm also nicht mitteilen, ob der von Ihnen vertretene Patient in der Kontrollgruppe oder in der Interventionsgruppe ist. Das bedeutet auch, dass in seiner Anwesenheit nicht über den Kontakt mit dem Fallmanager berichtet werden darf. Sie werden vor jedem Termin darauf hingewiesen und erinnert werden.

Der Studienablauf ist in Abbildung 1 unter „geplante Maßnahmen und Ablauf der Teilnahme“ dargestellt und genauer beschrieben.

Die Studie wird unter dem Förderkennzeichen 01VSF19029 vom Innovationsausschuss beim Gemeinsamen Bundesausschuss (GBA) gefördert.

Die Ethikkommission der Medizinischen Fakultät zu Köln hat die vorliegende Studie am 19.11.2020 beraten und zustimmend bewertet.

### **Wer kann an der Studie teilnehmen?**

An dieser wissenschaftlichen Studie können Patienten teilnehmen, die die in der Tabelle gelisteten Einschlusskriterien erfüllen und ihr schriftliches Einverständnis zur Teilnahme an der Studie geben oder das ihres Vorsorgebevollmächtigten oder gesetzlichen Betreuers, sofern die Patienten selbst nicht in der Lage sein sollten, ihr schriftliches Einverständnis zu geben.

Nicht teilnehmen können Patienten mit den in der Tabelle gelisteten Ausschlusskriterien.

Die geplante Laufzeit dieses Vorhabens beträgt für die einzelnen Patienten und deren Bezugspersonen insgesamt 15 Monate. Insgesamt erstreckt sich die Studienlänge über 40 Monate und wird voraussichtlich Ende 2023 abgeschlossen sein. Es sollen insgesamt 80

Patienten mit schwerer MS sowie deren Bezugspersonen (sofern vorhanden und einverstanden) in die Studie eingeschlossen werden.

| <b>Einschlusskriterien</b>                                                                                                                                                                                                                                                                                                                                                                                                                                                            |                                                                                                                                                                                                                                                                                                                                                                                                                       |          |          |                                                                                                                                                                            |
|---------------------------------------------------------------------------------------------------------------------------------------------------------------------------------------------------------------------------------------------------------------------------------------------------------------------------------------------------------------------------------------------------------------------------------------------------------------------------------------|-----------------------------------------------------------------------------------------------------------------------------------------------------------------------------------------------------------------------------------------------------------------------------------------------------------------------------------------------------------------------------------------------------------------------|----------|----------|----------------------------------------------------------------------------------------------------------------------------------------------------------------------------|
| <b>Subgruppe 1</b>                                                                                                                                                                                                                                                                                                                                                                                                                                                                    | <b>Subgruppe 2</b>                                                                                                                                                                                                                                                                                                                                                                                                    |          |          |                                                                                                                                                                            |
| MS Patienten, die aufgrund eines hochaktiven Verlaufs, charakterisiert über klinische Schubaktivität und MRT-Aktivität, eine Indikation für ein Immuntherapeutikum der Eskalationsstufe (z.B. Alemtuzumab, Ocrelizumab, Rituximab, Ofatumumab, Natalizumab, Fingolimod, Siponimod, Ozanimod, Cladribin) haben und hiermit behandelt werden                                                                                                                                            | MS Patienten, mit primär oder sekundär chronisch progredienter MS                                                                                                                                                                                                                                                                                                                                                     |          |          |                                                                                                                                                                            |
| <b>UND</b> mindestens einer der beiden nachfolgenden Punkte zutreffend                                                                                                                                                                                                                                                                                                                                                                                                                | <b>UND</b>                                                                                                                                                                                                                                                                                                                                                                                                            |          |          |                                                                                                                                                                            |
| <ul style="list-style-type: none"> <li>Alter <math>\geq</math> 50 Jahre</li> <li>expanded disability status score (EDSS) <math>\geq</math> 5</li> </ul>                                                                                                                                                                                                                                                                                                                               | Alter $\geq$ 18 Jahre                                                                                                                                                                                                                                                                                                                                                                                                 |          |          |                                                                                                                                                                            |
|                                                                                                                                                                                                                                                                                                                                                                                                                                                                                       | <b>UND entweder a oder b zutreffend</b>                                                                                                                                                                                                                                                                                                                                                                               |          |          |                                                                                                                                                                            |
|                                                                                                                                                                                                                                                                                                                                                                                                                                                                                       | <table border="1"> <thead> <tr> <th><b>a</b></th> <th><b>b</b></th> </tr> </thead> <tbody> <tr> <td>mäßig ausgeprägter Behinderung (EDSS 4-7) und keine immuntherapeutischen Behandlungsoptionen (z.B. aufgrund fehlender Krankheitsaktivität in Form von Schüben oder im MRT)</td> <td>ausgeprägte Behinderungen (EDSS &gt; 7,0), mit oder ohne immuntherapeutische Behandlungsoptionen</td> </tr> </tbody> </table> | <b>a</b> | <b>b</b> | mäßig ausgeprägter Behinderung (EDSS 4-7) und keine immuntherapeutischen Behandlungsoptionen (z.B. aufgrund fehlender Krankheitsaktivität in Form von Schüben oder im MRT) |
| <b>a</b>                                                                                                                                                                                                                                                                                                                                                                                                                                                                              | <b>b</b>                                                                                                                                                                                                                                                                                                                                                                                                              |          |          |                                                                                                                                                                            |
| mäßig ausgeprägter Behinderung (EDSS 4-7) und keine immuntherapeutischen Behandlungsoptionen (z.B. aufgrund fehlender Krankheitsaktivität in Form von Schüben oder im MRT)                                                                                                                                                                                                                                                                                                            | ausgeprägte Behinderungen (EDSS > 7,0), mit oder ohne immuntherapeutische Behandlungsoptionen                                                                                                                                                                                                                                                                                                                         |          |          |                                                                                                                                                                            |
| <b>UND</b>                                                                                                                                                                                                                                                                                                                                                                                                                                                                            |                                                                                                                                                                                                                                                                                                                                                                                                                       |          |          |                                                                                                                                                                            |
| Wohnort im Regierungsbezirk Köln                                                                                                                                                                                                                                                                                                                                                                                                                                                      |                                                                                                                                                                                                                                                                                                                                                                                                                       |          |          |                                                                                                                                                                            |
| <b>UND</b> einer der beiden nachfolgenden Punkte zutreffend                                                                                                                                                                                                                                                                                                                                                                                                                           |                                                                                                                                                                                                                                                                                                                                                                                                                       |          |          |                                                                                                                                                                            |
| <ul style="list-style-type: none"> <li>Die Patienten sind der deutschen Sprache mächtig (verstehen, lesen, antworten) und sind in der Lage zur informierten, schriftlichen Einwilligung.</li> </ul> <p style="text-align: center;"><b>ODER</b></p> <ul style="list-style-type: none"> <li>Wenn der Patient dazu nicht in der Lage ist, gibt es einen Vorsorgebevollmächtigten / gesetzlichen Betreuer, der der deutschen Sprache mächtig ist (verstehen, lesen, antworten)</li> </ul> |                                                                                                                                                                                                                                                                                                                                                                                                                       |          |          |                                                                                                                                                                            |

und in der Lage zur informierten, schriftlichen Einwilligung stellvertretend für den Patienten ist.

#### **Ausschlusskriterien**

- Fehlendes Einverständnis, sich an das Studienprotokoll zu halten.
- Bestehender Drogenmissbrauch, Alkoholmissbrauch oder eine psychiatrische Erkrankung, die nach Ansicht des aufklärenden Arztes den Patienten für die Teilnahme an einer Studie ungeeignet macht.
- Jede Art von Abhängigkeit vom Prüfer oder vom Sponsor (einschließlich dort angestellt zu sein).

**Hinweis:** Sie dürfen, unabhängig von i) der Teilnahme Ihrer Bezugsperson und ii) anderen Diagnosen an der Studie teilnehmen (mit Ausnahme der unter Ausschlusskriterien genannten)

#### **Mögliche Risiken/Belastungen/Nebenwirkungen, die mit der Teilnahme verbunden sind**

Unerwünschte Nebenwirkungen sind unter Beachtung der Ausschlusskriterien, welche durch den einschließenden Studienarzt geprüft werden, nicht zu erwarten.

Mögliche Aspekte, die den von Ihnen vertretenden Patienten oder dessen Bezugsperson belasten, werden unabhängig davon, ob der von Ihnen vertretende Patient in der Interventions- oder Kontrollgruppe versorgt wird, alle drei Monate durch die reguläre Ergebnismessung erfasst. Kritische Parameter werden an die Primärbehandler (z.B. Hausarzt, Fachärzte, Therapeuten) weitergegeben werden, so dass diese die Möglichkeit haben, hierauf zeitnah zu reagieren. Natürlich können Sie die jeweilige Befragung / das Interview auch jederzeit ohne Angabe von Gründen vorzeitig beenden.

Die Teilnahme an der Studie ist mit einem Zeitaufwand für Sie verbunden. Insgesamt schätzen wir den zeitlichen Gesamtaufwand mit regulär ca. 1-1,5 Stunden pro Erhebung der Fragebögen (Baseline; Monate 3, 6, 9, 12, 15 in Form von Kontakten im persönlichen Gegenüber bei Ihnen vor Ort) für Sie als zumutbar ein. Die Case und Care Management Intervention erfolgt bei Ihnen vor Ort bzw. telefonisch. Für keinen der studienbedingten Termine ist eine zusätzliche Anreise von Ihnen erforderlich. Die Treffen / Telefonate mit dem Fallmanager werden jedoch - je nach Bedürfnislage - jeweils auch 0,5-2 Stunden in Anspruch nehmen. Eine mögliche Teilnahme an einem persönlichen Interview wird ungefähr 30-60 Minuten dauern.

#### **Möglicher Nutzen durch die Teilnahme**

Die Case und Care Management Intervention ist darauf ausgerichtet, den Bedürfnissen von betroffenen Patienten und deren Bezugspersonen so gut wie möglich zu begegnen und engmaschigen Kontakt zu den Behandlern zu halten. Unsere Erwartung ist, dass es für die Patienten und deren Bezugspersonen durch die gezielte Begegnung der Gesundheits- und Sozialversorgungsbelange mit Übernahme der Koordinationsabläufe, zu einer Verbesserung der Lebensqualität, Linderung der Symptomlast, verbesserten Risikowahrnehmung im Falle von Immuntherapien und nicht zuletzt durch eine gezieltere Nutzung von Angeboten der Gesundheits- und Sozialversorgung auch zu einer Verminderung von Sozial- und Gesundheitskosten kommt. Dies ist jedoch für schwer betroffene MS Patienten mit komplexen

Bedarfen noch nicht bewiesen. Daher ist es auch möglich, dass sich der erhoffte Nutzen für den von Ihnen vertretenden Patienten nicht einstellt. Durch die Teilnahme an der Studie ist der von Ihnen vertretene Patient jedoch keinem zusätzlichen Risiko im Vergleich zu der Regelversorgung ausgesetzt.

In jedem Falle kann Ihre Teilnahme an der Studie dazu beitragen, dass neue und wichtige Erkenntnisse über den Nutzen einer Case und Care Management Intervention gewonnen werden. Diese Erkenntnisse können dem von Ihnen vertretenen Patienten und anderen Patienten und Bezugspersonen perspektivisch helfen.

### **Geplante Maßnahmen und Ablauf der Teilnahme**

Der Studieneinschluss erfolgt nach einer ausführlichen Bereitstellung von Informationen und der Aufklärung durch einen Studienarzt der Klinik und Poliklinik für Neurologie oder des Zentrums für Palliativmedizin der Uniklinik Köln. Hierzu wird einer der Studienärzte den Patienten und Sie dort aufsuchen, wo Sie sich gerade befinden (z.B. in der Klinik (ambulant/stationär), zu Hause). Voraussetzung für die Studienteilnahme ist das Zutreffen oben genannter Einschlusskriterien des von Ihnen vertretenden Patienten sowie Ihr schriftliches Einverständnis als gesetzlicher Vertreter des Patienten (Vorsorgebevollmächtigter, gesetzlicher Betreuer).

Nach dem schriftlichen Einverständnis (s. Abschnitt „Wer kann an der Studie teilnehmen?“) erfolgt die Basisuntersuchung (Baseline) durch einen geschulten Studienmitarbeiter. Die Basisuntersuchung findet dort statt, wo Sie (und der Patient) sich befinden, z.B. bei Ihnen / dem Patienten zu Hause und besteht aus der Beantwortung verschiedener Fragebögen zu folgenden Bereichen: soziodemographische Daten, Lebensqualität, palliativmedizinische Beschwerden und Bedürfnisse, Angst und Depression, Wahrnehmung zur Therapiesicherheit von Immuntherapien und Erfassung der Nutzung von Angeboten gesundheitsbezogener Leistungen.

Im Anschluss erfolgt die Randomisierung in die Kontroll- oder Interventionsgruppe (s. Abschnitt „Art der Studie“).

In der **Interventionsgruppe** findet der erste Kontakt mit dem Fallmanager zur Vorstellung und Erfassung der Sozial-/Gesundheitsbedarfe sobald als möglich nach der Basiserhebung statt. Zwischen Studieneinschluss und erstem Kontakt mit dem Fallmanager sollte so wenig Zeit wie möglich, maximal jedoch 2 Wochen vergehen. Nach dem ersten persönlichen Kontakt findet anschließend jede Woche ein Kontakt per Telefon bzw. ein persönlicher Kontakt alle 4 Wochen ( $\pm$  3 Tage) durch einen Besuch am Standort von Ihnen / der Bezugsperson statt. Ziel der Intervention ist es, einen auf die Patienten und ihre Bezugspersonen individuell abgestimmten Handlungs- und Maßnahmenplan zu erstellen, der auf Gesundheits- und Sozialversorgungsbelangen abzielt. Hierzu zählen z.B. folgende Maßnahmen: Herstellung und Koordination von Kontakten zu professionellen Helfern des Gesundheitssystems, Hilfe bei Klärung von Fragen mit der Kranken-/Rentenversicherung, Koordination von z.B. immuntherapeutischen Behandlungen. Die Dauer der Intervention beträgt 12 Monate.

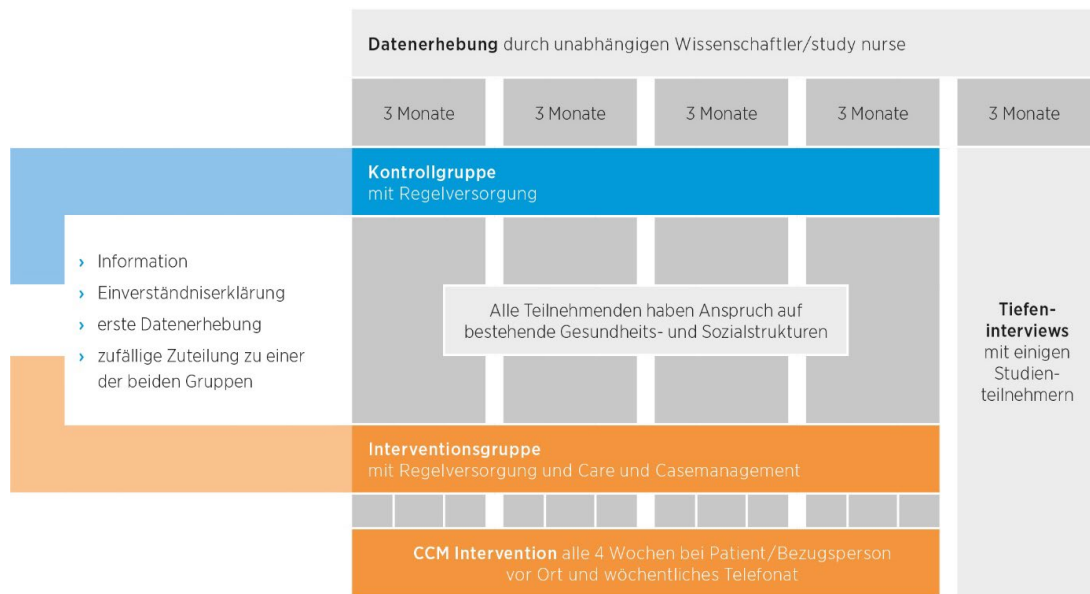

**Abbildung 1:** Flussdiagramm Studienverlauf, Abkürzungen: Care und Case Management (CCM)

Alle Patienten bzw. ihre gesetzlichen Vertreter und teilnehmenden Bezugspersonen, unabhängig davon, ob der von Ihnen vertretende Patient in der Kontroll- oder in der Interventionsgruppe ist, werden alle 3 Monate von einem geschulten Mitarbeiter dort, wo Sie sich befinden (z.B. zu Hause) aufgesucht. Er füllt mit Ihnen zusammen die verschiedenen Fragebögen aus (alle auf den Seiten 3 und 4 genannten, bis auf zwei, die nur einmalig zu Beginn erhoben werden). Insgesamt erfolgen nach der Basiserhebung also noch 5 weitere persönliche Treffen zwischen den Studienteilnehmern und dem geschulten Mitarbeiter aus dem Studienteam. Das letzte Treffen dient der Nachbeobachtung (sogenanntes „Follow-up“).

Wir möchten die Belastung für Sie und die Bezugsperson des von Ihnen vertretenden Patienten durch die Studie möglichst geringhalten. Daher brauchen Sie wegen der Studie nicht extra in die Klinik zu kommen, sondern alle Studientermine werden dort stattfinden, wo Sie und der von Ihnen vertretene Patient sich zu der Zeit befinden.

Ca. 12 Monate nach Einschluss des ersten Patienten werden wir jeweils 9-12 Patienten und 9-12 Bezugspersonen aus der Interventionsgruppe bitten, zusätzlich an einem persönlichen Interview teilzunehmen. Gegebenenfalls würden wir Sie zu einem späteren Zeitpunkt noch einmal kontaktieren, um mit Ihnen einen Termin für ein persönliches Interview zu vereinbaren. In diesen Interviews haben Sie stellvertretend für den Patienten oder auch aus der Sicht einer Bezugsperson die Gelegenheit, ihre ganz individuellen Erfahrungen mit dem neuen Case und Care Management Dienst zu vertiefen. Dieses Interview wird jeweils dort stattfinden, wo Sie sich befinden. Zu Analysezwecken wird das Interview auf Tonband aufgezeichnet und wörtlich in einen Text überführt (Transkription) werden.

Nach Studienende oder auch bei freiwilligem Rücktritt von der Studienteilnahme steht dem von Ihnen vertretenen Patienten weiterhin die Regelversorgung durch bestehende Gesundheits- und Sozialstrukturen zur Verfügung.

## Datenverarbeitung und Datenschutz

Während der klinischen Studie werden medizinische Befunde und persönliche Informationen von dem von Ihnen vertretenen Patienten und Ihnen (z.B. Ihre Telefonnummer) erhoben und im Studienzentrum in einer Akte niedergeschrieben oder elektronisch gespeichert. Die für die klinische Studie wichtigen Daten werden in pseudonymisierter Form gespeichert und nach Good Scientific Practice wissenschaftlich ausgewertet.

Pseudonymisieren bedeutet, dass die personenbezogenen Daten (in dem Fall des von Ihnen vertretenen Patienten) wie der Name und das Geburtsdatum ohne Hinzuziehung einer Codeliste nicht mehr einer konkreten Person zugeordnet werden können. Die personenbezogenen Daten werden durch einen Nummern- und/oder Buchstabencode ersetzt. Im Studienzentrum ist eine Liste hinterlegt (elektronisch und in Papierform), auf der die Namen den Nummern- und/oder Buchstabencodes zugeordnet sind. Diese Liste wird im Studienzentrum gesondert und unter Verschluss bzw. zugriffsbeschränkt aufbewahrt und unterliegt dort technischen und organisatorischen Maßnahmen, die gewährleisten, dass die personenbezogenen Daten Ihnen durch unbefugte Personen nicht zugeordnet werden können. Eine Entschlüsselung erfolgt nur unter den vom Gesetz vorgeschriebenen Voraussetzungen. Zugriff auf diese Listen haben nur zuständige und zur Verschwiegenheit verpflichtete Mitarbeiter des Studienzentrums.

Die Rechtsgrundlage für die Datenverarbeitung ist Ihre freiwillige, schriftliche Einwilligung.

Die im Rahmen der Studie erhobenen Daten werden von einem elektronischen Datensystem erfasst und statistisch ausgewertet. Nach Beendigung der Studie werden alle Daten über einen Zeitraum von 10 Jahren gemäß wissenschaftlichem Standard in einem sicheren System gespeichert und archiviert. Im Anschluss werden die Daten gelöscht oder anonymisiert. Anonymisiert heißt, dass der Zuordnungscode gelöscht wird und die Daten ggf. so weiter verändert werden, dass sie in keiner Weise Ihrer Person oder dem von Ihnen vertretenen Patienten zugeordnet werden können.

Die Verarbeitung der erhobenen Daten erfolgt in Verantwortung der Studienleitung (s. Seite 1).

Sie haben das Recht auf Auskunft sowie Einsichtnahme über die Sie und die des von Ihnen vertretenen Patienten betreffenden personenbezogenen Daten, die im Rahmen der Studie erhoben, verarbeitet oder ggf. an Dritte übermittelt werden.

Sollten Sie dabei Fehler in Ihren Daten oder den Daten des von Ihnen vertretenen Patienten feststellen, so haben Sie das Recht, diese berichtigen zu lassen. Ferner haben Sie das Recht eine kostenfreie Kopie dieser Daten zu erhalten.

Sie haben auch das Recht, eine Löschung der über Sie gespeicherten Daten und den Daten des von Ihnen vertretenen Patienten zu verlangen.

Die Daten werden zu jeder Zeit vertraulich behandelt. Die pseudonymisierten Daten werden der Studienleitung in pseudonymisierter Form bzw. von ihr beauftragten Stellen zum Zweck des Datenmanagements (Zentrum für klinische Studien der Universität zu Köln) bzw. der



wissenschaftlichen Auswertung (Institut für Medizinische Statistik und Bioinformatik der Universität zu Köln, Institut für Gesundheitsökonomie und Klinische Epidemiologie der Universität zu Köln) zur Verfügung gestellt. Zugriff auf die personenbezogenen und -identifizierenden Daten haben nur die zuständigen Personen im Studienzentrum. Diese unterliegen der ärztlichen Schweigepflicht (§ 203 StGB) und sind an die Wahrung des Datengeheimnisses (§6 DSGVO NRW) gebunden.

Wissenschaftliche Veröffentlichungen von Ergebnissen erfolgen ausschließlich anonymisiert, also in einer Form, die keine Rückschlüsse auf den von Ihnen vertretenen Patienten zulässt.

Die ordnungsgemäße Durchführung der Studie, insbesondere die ordnungsgemäße Erhebung der Daten sowie deren Zuordnung zu bestimmten Teilnehmern, können von Beauftragten der Studienleitung, Hilfspersonal der Prüfer und Beauftragten des Sponsors (Monitore, Auditoren) und Inspektoren auch durch direkte Einsicht in Ihre beim Studienarzt vorliegenden personenbezogenen (d.h. in Verbindung mit Ihrem Namen genannten) Daten sowie die Daten des von Ihnen vertretenen Patienten überprüft werden. Diese sind zur Verschwiegenheit verpflichtet und dürfen Ihre Daten und die Daten des von Ihnen vertretenen Patienten nur in pseudonymisierter Form weitergeben und keine Kopien oder Abschriften von diesen Unterlagen erstellen.

### **Sind mit der Datenverarbeitung Risiken verbunden?**

Bei jeder Erhebung, Speicherung, Nutzung und Übermittlung von Daten bestehen Vertraulichkeitsrisiken (z.B. die Möglichkeit, die betreffende Person zu identifizieren). Diese Risiken lassen sich nicht völlig ausschließen und steigen, je mehr Daten miteinander verknüpft werden können. Die Studienleitung versichert Ihnen, alles nach dem Stand der Technik Mögliche zum Schutz Ihrer Privatsphäre und der Privatsphäre des von Ihnen vertretenden Patienten zu tun und Daten nur an Stellen weiterzugeben, die ein geeignetes Datenschutzkonzept vorweisen können. Medizinische Risiken sind mit der Datenverarbeitung nicht verbunden.

Betrifft nur das Interview: Wir erstellen eine Tonbandaufnahme vom Gespräch und lassen es anschließend wörtlich verschriftlichen (Transkription). Dabei werden die Aufzeichnungen mit einem Ersatznamen versehen, damit die Inhalte nicht mit Ihrer Person oder dem von Ihnen vertretenen Patienten in Verbindung gebracht werden können. Wir weisen Sie jedoch darauf hin, dass insbesondere aufgrund Ihrer Stimme und ggf. der ausgesprochenen Inhalte eine Re-Identifizierung nicht ausgeschlossen werden kann. Die Tonaufnahme des Interviews ist lediglich projektinternen Mitarbeitern des Studienzentrums zugänglich sowie der professionell transkribierenden Person, die vor Erhalt der Tonbandaufnahme eine Vertraulichkeitserklärung unterschreibt und das Transkript nach Erstellung an das Forschungsteam, ohne eine Vervielfältigung vorgenommen zu haben, zurückgibt. Die Tonbandaufnahmen sowie die Transkripte werden nur für die Auswertung der Untersuchung genutzt. Sie werden ebenfalls mit einer zufälligen Kennnummer (Pseudonymisierung) gespeichert. Alle Personen-, Orts- und Straßennamen werden durch die Bezeichnung „Ort X“ oder „Straße XY“ unkenntlich genannt. Einzelne Zitate werden möglicherweise in wissenschaftlichen Arbeiten veröffentlicht, dabei ist nicht erkennbar, von welcher Person diese stammen.

Für die Sicherheit und Instandhaltung der elektronischen Infrastruktur am Studienzentrum ist IT-Abteilung der UKK (UK-IT) zuständig.

### **Kann ich meine Einwilligung widerrufen?**

Sie können Ihre jeweilige Einwilligung jederzeit ohne Angabe von Gründen schriftlich oder mündlich widerrufen, ohne dass Ihnen oder dem von Ihnen vertretenden Patienten daraus ein Nachteil entsteht. Wenn Sie Ihre Einwilligung widerrufen, werden keine weiteren Daten mehr erhoben.

### **Welche weiteren Rechte habe ich bezogen auf den Datenschutz?**

Bei Anliegen zur Datenverarbeitung und zur Einhaltung der datenschutzrechtlichen Anforderungen sollten Sie sich in erster Linie an die Studienleitung (siehe Seite 1) wenden. Sie können Sie sich auch an folgende Datenschutzbeauftragte wenden:

Datenschutzbeauftragter der Universität zu Köln  
dsb@verw.uni-koeln.de  
0221-470-0

Datenschutzbeauftragter der Uniklinik Köln  
datenschutz@uk-koeln.de  
0221-478-39046

Sie haben außerdem ein Beschwerderecht bei jeder Aufsichtsbehörde für den Datenschutz. Eine Liste der Aufsichtsbehörden in Deutschland finden Sie unter

[https://www.bfdi.bund.de/DE/Infothek/Anschriften\\_Links/anschriften\\_links-node.html](https://www.bfdi.bund.de/DE/Infothek/Anschriften_Links/anschriften_links-node.html)

Die für die Studienleitung zuständige Datenschutzaufsichtsbehörde ist:

Landesbeauftragte für Datenschutz und Informationsfreiheit Nordrhein-Westfalen  
Postfach 20 04 44, 40102 Düsseldorf  
Kavalleriestraße 2-4, 40213 Düsseldorf  
Tel.: 0211-384-24-0  
Fax: 0211-384-24-10  
E-Mail: poststelle@ldi.nrw.de

### **Probandenversicherung**

Da weder studienbedingte Risiken für die Gesundheit bestehen, noch studienbedingte Wege anfallen (diese Studie wird bei Ihnen vor Ort bzw. telefonisch erfolgen), wurden für die Studie keine Probandenversicherung und keine Wegeunfallversicherung abgeschlossen.

### **Mögliche Gründe für ein vorzeitiges Studienende**

Der Sponsor hat das Recht, die Studie vorzeitig abzubrechen, wenn es relevante medizinische oder ethische Bedenken gibt oder wenn der Abschluss der Studie nicht mehr praktikabel ist.

Wenn eine solche Maßnahme ergriffen wird, werden die Gründe für den Abbruch der Studie dokumentiert.

Ein vorzeitiger Abbruch der Studie wird in Betracht gezogen, wenn:

- sich das Nutzen-Risiko-Verhältnis für die Studienteilnehmer deutlich ändert
- es nicht mehr ethisch vertretbar ist, die Studie weiter fortzusetzen
- es nicht mehr praktikabel ist, die Studie abzuschließen
- identische Studien bessere Ergebnisse hinsichtlich einer Care und Case Management Intervention oder der Standardversorgung für schwer betroffene MS Patienten und deren Bezugspersonen zeigen

Der Sponsor entscheidet in Absprache mit der Studienleitung, der stellvertretenden Studienleitung und dem Studienstatistiker über den Abbruch der Studie.

### **Aufwandsentschädigung und Kostenerstattung**

Eine Aufwandsentschädigung wird Ihnen für Ihre Teilnahme an der Studie nicht gezahlt.

Es entstehen Ihnen, dem von Ihnen vertretenen Patienten und den Krankenkassen keinerlei Kosten durch die Teilnahme an der Studie.

### **Information über neue Erkenntnisse**

Ihr Studienarzt wird Sie in einer angemessenen Frist auch über jede Änderung und weitere wichtige, während der Studie bekanntwerdende Informationen in Kenntnis setzen, die Ihre Einwilligung, stellvertretend für den von Ihnen vertretenen Patienten, zur weiteren Teilnahme beeinflussen könnte.

### **Haben Sie weitere Fragen?**

Sollten Sie noch weitere Fragen zum Ablauf der Studie, zum Datenschutz, zu Ihren Rechten oder den Rechten des von Ihnen vertretenen Patienten, usw. haben, wenden Sie sich bitte an die studienbedingte Ansprechpartnerin. Die Kontaktdaten finden Sie auf der ersten Seite.

**Wir freuen uns sehr über Ihre Unterstützung und bedanken uns bereits jetzt für Ihre Zeit dieses Schreiben zu lesen.**

---

Frau PD Dr. Heidrun Golla  
Zentrum für Palliativmedizin  
Uniklinik Köln

Herr PD Dr. Clemens Warnke  
Klinik und Poliklinik für Neurologie  
Uniklinik Köln

**UNIKLINIK  
KÖLN**Zentrum für  
Palliativmedizin**UNIKLINIK  
KÖLN**Klinik und Poliklinik  
für Neurologie**Studienleitung:**

PD Dr. Heidrun Golla  
Zentrum für Palliativmedizin  
Uniklinik Köln

**Stellvertretende Studienleitung:**

PD Dr. Clemens Warnke  
Klinik und Poliklinik für Neurologie  
Uniklinik Köln

**Ansprechpartnerin:**

Dr. Veronika Dunkl  
Zentrum für Palliativmedizin  
Uniklinik Köln  
Tel.: 0221-478-50989  
E-Mail: veronika.dunkl@uk-koeln.de

## Einwilligungserklärung

- Ich habe die Information erhalten und wurde über Wesen, Bedeutung, Tragweite und Risiken des geplanten Vorhabens informiert. Mir wurde ausreichend Gelegenheit gegeben, alle offenen Fragen zu klären. Ich habe jederzeit das Recht, weitere Informationen zur Studie zu erfragen.
- Ich erkläre mich freiwillig bereit, stellvertretend für den von mir vertretenen Patienten, an der Studie teilzunehmen.
- Ich habe jederzeit das Recht, ohne Angabe von Gründen von der Studie zurückzutreten, ohne dass für mich oder den von mir vertretenen Patienten Nachteile in der medizinischen Behandlung daraus entstehen.

## Einwilligungserklärung zum Datenschutz

Bei dieser wissenschaftlichen Studie werden personenbezogene Daten über Sie und den von Ihnen vertretenen Patienten erhoben und zugriffsbeschränkt am Studienzentrum aufbewahrt und die elektronisch erfassten Daten pseudonymisiert auf dem zentralen Studien-Datenserver am Zentrum für Klinische Studien (ZKS) der Medizinischen Fakultät der Universität zu Köln gespeichert werden. Die Speicherung, Weitergabe und Auswertung dieser Daten erfolgt gemäß gesetzlichen Bestimmungen und setzt vor Teilnahme an der Studie die folgende freiwillige Einwilligung voraus:

1. Ich erkläre mich damit einverstanden, dass im Rahmen dieser Studie erhobene Daten (auf Fragebögen und elektronischen Datenträgern) in pseudonymisierter Form (ohne Namensnennung) aufgezeichnet und weitergegeben werden an:

- die Studienleitung oder eine von dieser beauftragten Stelle zum Zweck der wissenschaftlichen Auswertung
- im Falle von möglichen Aspekten, die den von Ihnen vertretenen Patienten belasten könnten: die Studienärzte, die Studienleitung sowie involvierte Primärbehandler (z.B. Hausarzt, Fachärzte, Therapeuten), damit diese die Möglichkeit haben, auf diese Aspekte reagieren zu können (in diesem Fall werden Ihre personenbezogenen Daten, d.h. mit Namensnennung, weitergegeben)

2. Außerdem erkläre ich mich damit einverstanden, dass autorisierte und zur Verschwiegenheit verpflichtete Beauftragte der Studienleitung, Hilfspersonal der Prüfer und Beauftragte des Sponsors (Monitore, Auditoren) und Inspektoren in die beim Studienarzt vorhandenen personenbezogenen Daten Einsicht nehmen können, soweit dies zur Überprüfung der Studie

**notwendig ist. Für diese Maßnahme entbinde ich den Studienarzt von der ärztlichen Schweigepflicht.**

**3. Ich erkläre mich damit einverstanden, dass meine Daten und die Daten des von mir vertretenen Patienten nach Beendigung oder Abbruch der Studie mindestens zehn Jahre nach Ende der Studie gemäß wissenschaftlichem Standard aufbewahrt werden. Danach werden meine personenbezogenen Daten und dies von mir vertretenen Patienten gelöscht oder anonymisiert.**

**4. Ich bin darüber aufgeklärt worden, dass ich jederzeit die Teilnahme an der Studie, stellvertretend für den von mir vertretenen Patienten, beenden kann. In diesem Falle werden bereits erhobene Daten gelöscht oder vollständig anonymisiert.**

**5. Ich habe die Informationen zum Datenschutz zur Kenntnis genommen und willige in die Datenverarbeitung ein.**

**6. Ich bin damit einverstanden, dass Gesundheitsdaten von mitbehandelnden Ärzten erhoben werden, soweit dies für die ordnungsgemäße Durchführung und Überwachung der Studie notwendig ist. Insoweit entbinde ich diese Ärzte von der Schweigepflicht. (Falls nicht gewünscht, bitte streichen.)**

**7. Ich bin darüber informiert und damit einverstanden, dass im Rahmen der Studienteilnahme das Studienpersonal in seiner jeweils spezifischen Funktion zur Sicherung der adäquaten Durchführung der Studie sowie im Falle von identifizierten Bedürfnissen und/oder möglichen Aspekten, die den von mir vertretenen Patienten belasten könnten, mit den Primärbehandlern des von mir vertretenen Patienten, z.B. Hausarzt, Fachärzten, Therapeuten Kontakt aufnehmen wird.**

.....  
Name/n des/r Primärbehandler/s

**Ja**                       **Nein**

Ich habe die vollständige Probandeninformation zur Studie sowie ein unterschriebenes Exemplar dieser Einwilligungserklärung erhalten.

.....  
Vor- und Nachname des gesetzlichen Vertreters (in Druckbuchstaben)

.....  
Ort und Datum (persönlich auszufüllen)

.....  
Unterschrift des gesetzlichen Vertreters



**UNIKLINIK  
KÖLN****Zentrum für  
Palliativmedizin****UNIKLINIK  
KÖLN****Klinik und Poliklinik  
für Neurologie****Studienleitung:**

PD Dr. Heidrun Golla  
Zentrum für Palliativmedizin  
Uniklinik Köln

**Stellvertretende Studienleitung:**

PD Dr. Clemens Warnke  
Klinik und Poliklinik für Neurologie  
Uniklinik Köln

**Ansprechpartnerin:**

Dr. Veronika Dunkl  
Zentrum für Palliativmedizin  
Uniklinik Köln  
Tel.: 0221-478-50989  
E-Mail: veronika.dunkl@uk-koeln.de

**Einwilligungserklärung (zum qualitativen Teil der Studie)**

- Ich habe die Information erhalten und wurde über Wesen, Bedeutung, Tragweite und Risiken des geplanten Vorhabens informiert. Mir wurde ausreichend Gelegenheit gegeben, alle offenen Fragen zu klären. Ich habe jederzeit das Recht, weitere Informationen zur Studie zu erfragen.
- Ich erkläre mich freiwillig bereit, stellvertretend für den von mir vertretenen Patienten, an der Studie teilzunehmen.
- Ich habe jederzeit das Recht, ohne Angabe von Gründen von der Studie zurückzutreten, ohne dass für mich oder den von mir vertretenen Patienten Nachteile in der medizinischen Behandlung daraus entstehen.

**Einwilligungserklärung zum Datenschutz**

Bei dieser wissenschaftlichen Studie werden personenbezogene Daten über Sie und den von Ihnen vertretenen Patienten erhoben und zugriffsbeschränkt am Studienzentrum aufbewahrt und die elektronisch erfassten Daten pseudonymisiert auf dem zentralen Studien-Datenserver am Zentrum für Klinische Studien (ZKS) der Medizinischen Fakultät der Universität zu Köln gespeichert werden. Die Speicherung, Weitergabe und Auswertung dieser Daten erfolgt gemäß gesetzlichen Bestimmungen und setzt vor Teilnahme an der Studie die folgende freiwillige Einwilligung voraus:

1. Ich erkläre mich damit einverstanden, dass im Rahmen dieser Studie erhobene Daten (auf Fragebögen und elektronischen Datenträgern) in pseudonymisierter Form (ohne Namensnennung) aufgezeichnet und weitergegeben werden an:

- die Studienleitung oder eine von dieser beauftragten Stelle zum Zweck der wissenschaftlichen Auswertung
- im Falle von möglichen Aspekten, die den von Ihnen vertretenen Patienten belasten könnten: die Studienärzte, die Studienleitung sowie involvierte Primärbehandler (z.B. Hausarzt, Fachärzte, Therapeuten), damit diese die Möglichkeit haben, auf diese Aspekte reagieren zu können (in diesem Fall werden Ihre personenbezogenen Daten, d.h. mit Namensnennung, weitergegeben)

2. Außerdem erkläre ich mich damit einverstanden, dass autorisierte und zur Verschwiegenheit verpflichtete Beauftragte der Studienleitung, Hilfspersonal der Prüfer und Beauftragte des Sponsors (Monitore, Auditoren) und Inspektoren in die beim Studienarzt vorhandenen personenbezogenen Daten Einsicht nehmen können, soweit dies zur Überprüfung der Studie

**notwendig ist. Für diese Maßnahme entbinde ich den Studienarzt von der ärztlichen Schweigepflicht.**

**3. Ich erkläre mich damit einverstanden, dass meine Daten und die Daten des von mir vertretenen Patienten nach Beendigung oder Abbruch der Studie mindestens zehn Jahre nach Ende der Studie gemäß wissenschaftlichem Standard aufbewahrt werden. Danach werden meine personenbezogenen Daten und die des von mir vertretenen Patienten gelöscht oder anonymisiert.**

**4. Ich bin darüber aufgeklärt worden, dass ich jederzeit die Teilnahme an der Studie, stellvertretend für den von mir vertretenen Patienten, beenden kann. In diesem Falle werden bereits erhobene Daten gelöscht oder vollständig anonymisiert.**

**5. Ich habe die Informationen zum Datenschutz zur Kenntnis genommen und willige in die Datenverarbeitung ein.**

**6. Ich bin damit einverstanden, dass Gesundheitsdaten von mitbehandelnden Ärzten erhoben werden, soweit dies für die ordnungsgemäße Durchführung und Überwachung der Studie notwendig ist. Insoweit entbinde ich diese Ärzte von der Schweigepflicht. (Falls nicht gewünscht, bitte streichen.)**

**7. Ich bin darüber informiert und damit einverstanden, dass im Rahmen der Studienteilnahme das Studienpersonal in seiner jeweils spezifischen Funktion zur Sicherung der adäquaten Durchführung der Studie sowie im Falle von identifizierten Bedürfnissen und/oder möglichen Aspekten, die den von mir vertretenen Patienten belasten könnten, mit den Primärbehandlern des von mir vertretenen Patienten, z.B. Hausarzt, Fachärzten, Therapeuten Kontakt aufnehmen wird.**

.....  
Name/n des/r Primärbehandler/s

**8. Ich bin ich damit einverstanden, dass das Interview auf Tonband aufgezeichnet wird und die Daten in pseudonymisierter Form (ohne Namensnennung) im Rahmen der Studie verwendet werden.**

**Ja**                       **Nein**

Ich habe die vollständige Probandeninformation zur Studie sowie ein unterschriebenes Exemplar dieser Einwilligungserklärung erhalten.

.....  
Vor- und Nachname des gesetzlichen Vertreters (in Druckbuchstaben)

.....  
Ort und Datum (persönlich auszufüllen)

.....  
Unterschrift des gesetzlichen Vertreters





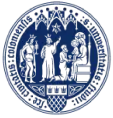**UNIKLINIK  
KÖLN****Zentrum für  
Palliativmedizin****Studienleitung:**

PD Dr. Heidrun Golla  
Zentrum für Palliativmedizin  
Uniklinik Köln

**Ansprechpartnerin:**

Dr. Veronika Dunkl  
Zentrum für Palliativmedizin  
Uniklinik Köln  
Tel.: 0221-478-50989  
E-Mail: veronika.dunkl@uk-koeln.de

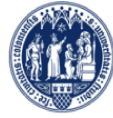**UNIKLINIK  
KÖLN****Klinik und Poliklinik  
für Neurologie****Stellvertretende Studienleitung:**

PD Dr. Clemens Warnke  
Klinik und Poliklinik für Neurologie  
Uniklinik Köln

**Die Verantwortung für die Studie liegt bei:**

PD Dr. Heidrun Golla  
Zentrum für Palliativmedizin  
Uniklinik Köln  
Kerpener Str. 62, 50937 Köln  
Tel.: 0221-478-3368  
E-Mail: heidrun.golla@uk-koeln.de

**Lokal verantwortliche Studienärzte<sup>1</sup> am Studienzentrum (jeweils am Zentrum für Palliativmedizin und der Klinik und Poliklinik für Neurologie):**

PD Dr. Heidrun Golla  
Zentrum für Palliativmedizin  
Uniklinik Köln  
Kerpener Str. 62, 50937 Köln  
Tel.: 0221-478-3368  
E-Mail: heidrun.golla@uk-koeln.de

PD Dr. Clemens Warnke  
Klinik und Poliklinik für Neurologie  
Uniklinik Köln  
Kerpener Str. 62, 50937 Köln  
Tel.: 0221-478-6188  
E-Mail: clemens.warnke@uk-koeln.de

**Information über die Teilnahme an der Studie**

Sehr geehrte Dame, sehr geehrter Herr,

wir freuen uns, dass Sie an unserer Studie zur „Kommunikation, Koordination und Sicherheit für Menschen mit Multipler Sklerose (KOKOS-MS)“ interessiert sind und uns eventuell durch Ihre Teilnahme hierbei unterstützen möchten. Im Folgenden möchten wir Sie über die Ziele und den Verlauf der Studie informieren und Ihnen erklären, warum Ihre Mitarbeit im Falle einer Studienteilnahme wichtig ist. Die Studie wird zu Forschungszwecken durchgeführt.

<sup>1</sup> Im Interesse einer besseren Lesbarkeit wird nicht ausdrücklich in geschlechtsspezifischen Personenbezeichnungen differenziert. Die gewählte männliche Form schließt eine adäquate weibliche Form gleichberechtigt ein.

Wir bitten Sie, diese Information sorgfältig zu lesen und anschließend zu entscheiden, ob Sie an dieser Studie teilnehmen möchten oder nicht.

Ihre Teilnahme an dieser Studie ist freiwillig. Sie werden in diese Studie also nur dann einbezogen, wenn Sie dazu schriftlich Ihre Einwilligung erklären. Sofern Sie nicht an der Studie teilnehmen oder später Ihre Einwilligung widerrufen, entstehen Ihnen daraus keine Nachteile.

Der Studienarzt hat Ihnen bereits eine Reihe von Informationen zu der geplanten Studie gegeben. Der nachfolgende Text soll Sie über die wichtigen Aspekte der Studie, insbesondere die Ziele und den Ablauf informieren. Lesen Sie die Teilnehmerinformation bitte sorgfältig und gewissenhaft. Anschließend wird ein Studienarzt das Aufklärungsgespräch mit Ihnen führen. Bitte zögern Sie nicht, alle Punkte anzusprechen, die Ihnen unklar sind. Sie werden danach ausreichend Bedenkzeit erhalten, um über Ihre Teilnahme zu entscheiden.

### Ziel der Studie

Studien und eigene klinische Erfahrungen zeigen, dass schwer betroffene MS Patienten und ihre An-/Zugehörigen (im Folgenden als Bezugspersonen bezeichnet) oftmals einen kontinuierlichen koordinierenden Ansprechpartner vermissen, der gemeinsam mit ihnen ihre Bedarfe definiert und ordnet, sich für ihre Belange einsetzt und verschiedene Abläufe koordiniert, im Sinne einer „Prozesskoordination“. Solche Aufgaben können durch einen sogenannten „Fallmanager“ übernommen werden. Seine Tätigkeit wird auch als „Care und Case Management“ bezeichnet und konnte bereits für verschiedene Patientengruppen die Koordinationsabläufe vereinfachen, Lebensqualität verbessern und Sozial- und Gesundheitskosten senken. Bislang fehlt der Nachweis dieser positiven Effekte jedoch für schwer betroffene MS Patienten sowie für deren Bezugspersonen. Ziel dieser Studie ist die Evaluation eines solchen Care und Case Management Dienstes bei schwerer MS, der die Patienten und deren Bezugspersonen über einen längeren Zeitraum (in dieser Studie über 12 Monate) in Gesundheits- und Sozialversorgungsbelangen begleitet. Hierbei sollen Anliegen der Patienten aber auch der Bezugspersonen Berücksichtigung finden. Dies erfolgt sektorenübergreifend, d.h. unabhängig davon, ob sich Patienten gerade ambulant oder stationär in Behandlung befinden. Von der Durchführung dieser Studie erhoffen wir uns, die Versorgung der MS Patienten und deren Bezugspersonen zukünftig verbessern zu können.

### Art der Studie

Bei der Studie handelt es sich um eine sogenannte „randomisierte kontrollierte Phase II klinische Studie“ im Sinne einer komplexen Intervention mit parallelen Armen. Dies bedeutet, dass Sie, gekoppelt mit dem Patienten, computergestützt zufällig entweder der Kontroll- oder der Interventionsgruppe (s. unten für eine genauere Beschreibung beider Gruppen) zugewiesen werden. Dieses Verfahren wird **Randomisierung** genannt und ist vergleichbar mit dem Werfen einer Münze (Wahrscheinlichkeit von 50%). Das Studienteam hat keinen Einfluss darauf, ob Sie der Interventionsgruppe oder der Kontrollgruppe zugeordnet werden.

In der **Kontrollgruppe** erhalten die Patienten die Regelversorgung innerhalb der bestehenden Gesundheits- und Sozialstrukturen.

In der **Interventionsgruppe** erhalten die Patienten gemeinsam mit den Bezugspersonen – falls teilnehmend- zusätzlich zur Regelversorgung regulär strukturierte Kontakte mit einem kontinuierlich über die Studie begleitendem Fallmanager.

Sie und der Patient sowie die Behandler sind darüber informiert, in welcher Gruppe (Kontroll- oder Interventionsgruppe) Sie sich befinden. Der geschulte Studienmitarbeiter, der sich regelmäßig mit Ihnen und Ihrer Bezugsperson treffen wird, um sich mit Hilfe von Fragebögen nach Ihrem Befinden zu erkundigen, ist jedoch „verblindet“ (**Beobachter-blinde Studie**). Das heißt, der Studienmitarbeiter weiß nicht, ob Sie sich in der Interventions- oder in der Kontrollgruppe befinden. Es ist wichtig, dass der Studienmitarbeiter zu jedem Zeitpunkt der Studie verblindet bleibt, d.h., Sie dürfen ihm also nicht mitteilen, ob Sie in der Kontrollgruppe oder in der Interventionsgruppe sind. Das bedeutet auch, dass in seiner Anwesenheit nicht über den Kontakt mit dem Fallmanager berichtet werden darf. Sie werden vor jedem Termin darauf hingewiesen und erinnert werden.

Der Studienablauf ist in Abbildung 1 unter „geplante Maßnahmen und Ablauf der Teilnahme“ dargestellt und genauer beschrieben.

Die Studie wird unter dem Förderkennzeichen 01VSF19029 vom Innovationsausschuss beim Gemeinsamen Bundesausschuss (GBA) gefördert.

Die Ethikkommission der Medizinischen Fakultät zu Köln hat die vorliegende Studie am 19.11.2020 beraten und zustimmend bewertet.

### Wer kann an der Studie teilnehmen?

An dieser wissenschaftlichen Studie können Bezugspersonen teilnehmen, die die in der Tabelle gelisteten Einschlusskriterien erfüllen und ihr schriftliches Einverständnis zur Teilnahme an der Studie geben.

Nicht teilnehmen können Patienten mit den in der Tabelle gelisteten Ausschlusskriterien.

Die geplante Laufzeit dieses Vorhabens beträgt für die einzelnen Patienten und deren Bezugspersonen insgesamt 15 Monate. Insgesamt erstreckt sich die Studienlänge über 40 Monate und wird voraussichtlich Ende 2023 abgeschlossen sein. Es sollen insgesamt 80 Patienten mit schwerer MS sowie deren Bezugspersonen (sofern vorhanden und einverstanden) in die Studie eingeschlossen werden.

#### **Einschlusskriterien**

- Bezugsperson, die sich hauptverantwortlich um den Patienten sorgt
- Alter  $\geq$  18 Jahre
- Der deutschen Sprache mächtig (verstehen, lesen, antworten)
- In der Lage zur informierten, schriftlichen Einwilligung

#### **Ausschlusskriterien**

- Fehlendes Einverständnis, sich an das Studienprotokoll zu halten
- Geschäftsunfähigkeit

- Bestehender Drogenmissbrauch, Alkoholmissbrauch oder eine psychiatrische Erkrankung, die nach Ansicht des aufklärenden Arztes die Bezugsperson für die Teilnahme an einer Studie ungeeignet macht.
- Jede Art von Abhängigkeit vom Prüfer oder vom Sponsor oder Prüfer (einschließlich dort angestellt zu sein).

### **Mögliche Risiken/Belastungen/Nebenwirkungen, die mit der Teilnahme verbunden sind**

Unerwünschte Nebenwirkungen sind unter Beachtung der Ausschlusskriterien, welche durch den einschließenden Studienarzt geprüft werden, nicht zu erwarten.

Die Teilnahme an der Studie ist mit einem Zeitaufwand für Sie verbunden. Insgesamt schätzen wir den zeitlichen Gesamtaufwand für Sie als zumutbar ein. Er beträgt ca. 20-30 Minuten pro Erhebung der Sie betreffenden Fragebögen (Baseline; Monate 3, 6, 9, 12, 15 in Form von Kontakten im persönlichen Gegenüber bei Ihnen / bei dem Patienten vor Ort). Da Sie auch bei der Erhebung der Fragebögen der Patienten mithelfen dürfen, kann sich die Dauer der Datenerhebung auf ca. 1,5 Stunden verlängern. Falls der Patient sich gar nicht dazu in der Lage sieht die Fragebögen auszufüllen, ist es möglich, dass ein Stellvertreter, der den Patienten gut kennt (z.B. Sie oder eine Pflegekraft) anstelle des Patienten die Fragebögen so gut wie möglich aus Sicht des Patienten ausfüllt. Die Care und Case Management Intervention erfolgt bei dem Patienten und Ihnen vor Ort bzw. telefonisch. Für keinen der studienbedingten Termine ist eine zusätzliche Anreise von Ihnen erforderlich. Die Treffen / Telefonate mit dem Fallmanager werden jedoch - je nach Bedürfnislage - jeweils auch 0,5-2 Stunden in Anspruch nehmen. Eine mögliche Teilnahme an einem persönlichen Interview zur Vertiefung ihrer individuellen Erfahrungen mit dem Care und Case Management Dienst wird ungefähr 30-60 Minuten dauern.

### **Möglicher Nutzen durch die Teilnahme**

Die Care und Case Management Intervention ist darauf ausgerichtet, den Bedürfnissen von Ihnen und dem Patienten so gut wie möglich zu begegnen und engmaschigen Kontakt zu den Behandlern des Patienten zu halten. Unsere Erwartung ist, dass es für die Patienten und deren Bezugspersonen durch die gezielte Begegnung der Gesundheits- und Sozialversorgungsbelange mit Übernahme der Koordinationsabläufe, zu einer Verbesserung der Lebensqualität, Linderung der Symptomlast, besseren Risikowahrnehmung im Falle von Immuntherapien und nicht zuletzt durch eine gezieltere Nutzung von Angeboten der Gesundheits- und Sozialversorgung auch zu einer Verminderung von Sozial- und Gesundheitskosten kommt oder beispielsweise auch zu einer Reduktion Ihrer eigenen Belastung. Dies ist jedoch für schwer betroffene MS Patienten und deren Bezugspersonen noch nicht bewiesen. Daher ist es auch möglich, dass sich der erhoffte Nutzen für Sie und den Patienten nicht einstellt. Durch die Teilnahme an der Studie sind Sie jedoch keinem Risiko ausgesetzt.

In jedem Falle kann Ihre Teilnahme an der Studie dazu beitragen, dass neue und wichtige Erkenntnisse über den Nutzen einer Care und Case Management Intervention gewonnen werden. Diese Erkenntnisse können Ihnen und anderen Bezugspersonen sowie den Patienten perspektivisch helfen.

## Geplante Maßnahmen und Ablauf der Teilnahme

Der Studieneinschluss erfolgt nach einer ausführlichen Bereitstellung von Informationen und der Aufklärung durch einen Studienarzt der Klinik und Poliklinik für Neurologie oder des Zentrums für Palliativmedizin der Uniklinik Köln. Hierzu wird einer der Studienärzte Sie dort aufsuchen, wo Sie sich gerade befinden (z.B. wenn Sie den Patienten in die Klinik begleiten (ambulant/stationär), zu Hause).

Nach dem schriftlichen Einverständnis (s. Abschnitt „Wer kann an der Studie teilnehmen?“) erfolgt die Basisuntersuchung (Baseline) durch einen geschulten Studienmitarbeiter. Die Basisuntersuchung findet dort statt, wo Sie sich im günstigsten Fall mit dem ebenfalls an der Studie teilnehmenden Patienten befinden, z.B. bei Ihnen oder bei dem Patienten zu Hause und besteht aus der Beantwortung verschiedener Fragebögen zu folgenden Bereichen: soziodemographische Daten, Lebensqualität, Belastung.

Im Anschluss erfolgt die Randomisierung in die Kontroll- oder Interventionsgruppe (s. Abschnitt „Art der Studie“).

In der **Interventionsgruppe** findet der erste Kontakt mit dem Fallmanager zur Vorstellung und Erfassung der Sozial-/Gesundheitsbedarfe findet sobald als möglich nach der Basiserhebung statt. Zwischen Studieneinschluss und erstem Kontakt mit dem Fallmanager sollte so wenig Zeit wie möglich, maximal jedoch 2 Wochen vergehen. Nach dem ersten persönlichen Kontakt findet anschließend jede Woche ein Kontakt per Telefon bzw. ein persönlicher Kontakt alle 4 Wochen ( $\pm$  3 Tage) durch einen Besuch am Standort von Ihnen / dem Patienten statt. Ziel der Intervention ist es, einen auf die Patienten und ihre Bezugspersonen individuell abgestimmten Handlungs- und Maßnahmenplan zu erstellen, der auf Gesundheits- und Sozialversorgungsbelangen abzielt. Hierzu zählen z.B. folgende Maßnahmen: Herstellung und Koordination von Kontakten zu professionellen Helfern des Gesundheitssystems, Hilfe bei Klärung von Fragen mit der Kranken-/Rentenversicherung, Koordination von z.B. immuntherapeutischen Behandlungen. Die Dauer der Intervention beträgt 12 Monate.

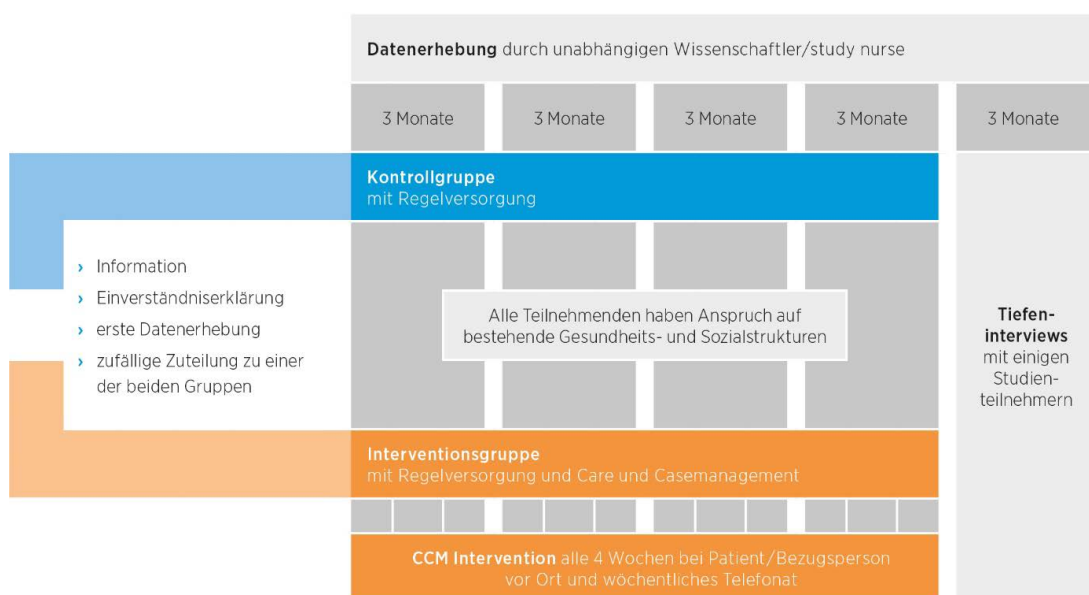

**Abbildung 1:** Flussdiagramm Studienverlauf, Abkürzungen: Care und Case Management (CCM)

Alle Patienten und teilnehmenden Bezugspersonen -unabhängig davon, ob Sie in der Kontroll- oder in der Interventionsgruppe sind- werden alle 3 Monate von einem geschulten Studienmitarbeiter dort, wo Sie sich befinden (z.B. zu Hause), aufgesucht. Er füllt mit Ihnen zusammen die verschiedenen Fragebögen aus (alle unter „Geplante Maßnahmen und Ablauf der Teilnahme“ genannten, bis auf zwei, die nur einmalig zu Beginn erhoben werden). Insgesamt erfolgen nach der Basiserhebung also noch 5 weitere persönliche Treffen zwischen Ihnen und dem geschulten Studienmitarbeiter. Das letzte Treffen dient der Nachbeobachtung (sogenanntes „Follow-up“).

Wir möchten die Belastung für Sie und den Patienten durch die Studie möglichst geringhalten. Daher brauchen Sie und der Patient nicht wegen der Studie extra in die Klinik kommen, sondern alle Studientermine werden dort stattfinden, wo Sie und der Patient sich zu der Zeit befinden. Falls der Allgemeinzustand des Patienten die Beantwortung der Fragen nicht zulassen sollte, können die Fragebögen, die den Patienten betreffen, stellvertretend durch Sie beantwortet werden.

Ca. 12 Monate nach Einschluss des ersten Patienten werden wir jeweils 9-12 Bezugspersonen und Patienten aus der Interventionsgruppe bitten, zusätzlich an einem persönlichen Interview teilzunehmen. Gegebenenfalls würden wir Sie zu einem späteren Zeitpunkt noch einmal kontaktieren, um mit Ihnen einen Termin für ein persönliches Interview zu vereinbaren. In diesen Interviews haben die Patienten und ihre Bezugsperson die Gelegenheit, ihre ganz individuellen Erfahrungen mit dem neuen Care und Case Management Dienst zu vertiefen. Dieses Interview wird jeweils dort stattfinden, wo sich die Patienten und die Bezugspersonen befinden. Zu Analysezwecken wird das Interview auf Tonband aufgezeichnet und wörtlich in einen Text überführt (Transkription) werden.

Nach Studienende oder auch bei freiwilligem Rücktritt von der Studienteilnahme steht dem Patienten weiterhin die Regelversorgung durch bestehende Gesundheits- und Sozialstrukturen zur Verfügung.

### **Datenverarbeitung und Datenschutz**

Während der klinischen Studie werden persönliche Informationen (Geschlecht, Alter, Familienstand, Kinder, Patchwork Familie, Wohnsituation, Höchster Schulabschluss, PLZ des Wohnortes, Relation zum Patienten) von Ihnen erhoben und am Studienzentrum in Ihrer persönlichen Akte niedergeschrieben oder elektronisch gespeichert. Die für die klinische Studie wichtigen Daten werden in pseudonymisierter Form gespeichert und wissenschaftlich nach Good Scientific Practice ausgewertet.

Pseudonymisieren bedeutet, dass die personenbezogenen Daten wie der Name und das Geburtsdatum ohne Hinzuziehung einer Codeliste nicht mehr einer konkreten Person zugeordnet werden können. Die personenbezogenen Daten werden durch einen Nummern- und/oder Buchstabencode ersetzt. Im Studienzentrum ist eine Liste hinterlegt (elektronisch und in Papierform), auf der die Namen den Nummern- und/oder Buchstabencodes zugeordnet sind. Diese Liste wird im Studienzentrum gesondert und unter Verschluss bzw. zugriffsbeschränkt aufbewahrt und unterliegt dort technischen und organisatorischen Maßnahmen, die gewährleisten, dass die personenbezogenen Daten Ihnen durch unbefugte Personen nicht zugeordnet werden können. Eine Entschlüsselung erfolgt nur unter den vom

Gesetz vorgeschriebenen Voraussetzungen. Zugriff auf diese Listen haben nur zuständige und zur Verschwiegenheit verpflichtete Mitarbeiter des Studienzentrums.

Die Rechtsgrundlage für die Datenverarbeitung ist Ihre freiwillige, schriftliche Einwilligung.

Die im Rahmen der Studie erhobenen Daten werden von einem elektronischen Datensystem erfasst und statistisch ausgewertet. Nach Beendigung der Studie werden alle Daten über einen Zeitraum von 10 Jahren gemäß wissenschaftlichem Standard in einem sicheren System gespeichert und archiviert. Im Anschluss werden Ihre Daten gelöscht oder anonymisiert. Anonymisiert heißt, dass der Zuordnungscode gelöscht wird und die Daten ggf. so weiter verändert werden, dass sie in keiner Weise Ihrer Person zugeordnet werden können.

Die Verarbeitung der erhobenen Daten erfolgt in Verantwortung der Studienleitung (s. Seite 1).

Sie haben das Recht auf Auskunft sowie Einsichtnahme über die Sie betreffenden personenbezogenen Daten, die im Rahmen der Studie erhoben, verarbeitet oder ggf. an Dritte übermittelt werden.

Sollten Sie dabei Fehler in Ihren Daten feststellen, so haben Sie das Recht, diese berichtigen zu lassen. Ferner haben Sie das Recht eine kostenfreie Kopie dieser Daten zu erhalten.

Sie haben auch das Recht, eine Löschung der über Sie gespeicherten Daten zu verlangen.

Die Daten werden zu jeder Zeit vertraulich behandelt. Die pseudonymisierten Daten werden der Studienleitung in pseudonymisierter Form bzw. von ihr beauftragten Stellen zum Zweck des Datenmanagements (Zentrum für klinische Studien der Universität zu Köln) bzw. der wissenschaftlichen Auswertung (Institut für Medizinische Statistik und Bioinformatik der Universität zu Köln, Institut für Gesundheitsökonomie und Klinische Epidemiologie der Universität zu Köln) zur Verfügung gestellt. Zugriff auf die personenbezogenen und -identifizierenden Daten haben nur die zuständigen Personen im Studienzentrum. Diese unterliegen der ärztlichen Schweigepflicht (§ 203 StGB) und sind an die Wahrung des Datengeheimnisses (§6 DSGVO NRW) gebunden.

Wissenschaftliche Veröffentlichungen von Ergebnissen erfolgen ausschließlich anonymisiert, also in einer Form, die keine Rückschlüsse auf Ihre Person zulässt.

Die ordnungsgemäße Durchführung der Studie, insbesondere die ordnungsgemäße Erhebung der Daten sowie deren Zuordnung zu bestimmten Teilnehmer, können von Beauftragten der Studienleitung, Hilfspersonal der Prüfer und Beauftragten des Sponsors (Monitore, Auditoren) und Inspektoren auch durch direkte Einsicht in Ihre beim Studienarzt vorliegenden personenbezogenen (d.h. in Verbindung mit Ihrem Namen genannten) Daten überprüft werden. Diese sind zur Verschwiegenheit verpflichtet und dürfen Ihre Daten nur in pseudonymisierter Form weitergeben und keine Kopien oder Abschriften von Ihren Unterlagen erstellen.

### **Sind mit der Datenverarbeitung Risiken verbunden?**



Bei jeder Erhebung, Speicherung, Nutzung und Übermittlung von Daten bestehen Vertraulichkeitsrisiken (z.B. die Möglichkeit, die betreffende Person zu identifizieren). Diese Risiken lassen sich nicht völlig ausschließen und steigen, je mehr Daten miteinander verknüpft werden können. Die Studienleitung versichert Ihnen, alles nach dem Stand der Technik Mögliche zum Schutz Ihrer Privatsphäre zu tun und Daten nur an Stellen weiterzugeben, die ein geeignetes Datenschutzkonzept vorweisen können. Medizinische Risiken sind mit der Datenverarbeitung nicht verbunden.

Betrifft nur das Interview: Wir erstellen eine Tonbandaufnahme vom Gespräch und lassen es anschließend wörtlich verschriftlichen (Transkription). Dabei werden die Aufzeichnungen mit einem Ersatznamen versehen, damit die Inhalte nicht mit Ihrer Person in Verbindung gebracht werden können. Wir weisen Sie jedoch darauf hin, dass insbesondere aufgrund Ihrer Stimme und ggf. der ausgesprochenen Inhalte eine Re-Identifizierung nicht ausgeschlossen werden kann. Die Tonaufnahme des Interviews ist lediglich projektinternen Mitarbeitern des Studienzentrums zugänglich sowie der professionell transkribierenden Person, die vor Erhalt der Tonbandaufnahme eine Vertraulichkeitserklärung unterschreibt und das Transkript nach Erstellung an das Forschungsteam, ohne eine Vervielfältigung vorgenommen zu haben, zurückgibt. Die Tonbandaufnahmen sowie die Transkripte werden nur für die Auswertung der Untersuchung genutzt. Sie werden ebenfalls mit einer zufälligen Kennnummer (Pseudonymisierung) gespeichert. Alle Personen-, Orts- und Straßennamen werden durch die Bezeichnung „Ort X“ oder „Straße XY“ unkenntlich genannt. Einzelne Zitate werden möglicherweise in wissenschaftlichen Arbeiten veröffentlicht, dabei ist nicht erkennbar, von welcher Person diese stammen.

Für die Sicherheit und Instandhaltung der elektronischen Infrastruktur am Studienzentrum ist IT-Abteilung der UKK (UK-IT) zuständig.

### **Kann ich meine Einwilligung widerrufen?**

Sie können Ihre jeweilige Einwilligung jederzeit ohne Angabe von Gründen schriftlich oder mündlich widerrufen, ohne dass Ihnen daraus ein Nachteil entsteht. Wenn Sie Ihre Einwilligung widerrufen, werden keine weiteren Daten mehr erhoben.

### **Welche weiteren Rechte habe ich bezogen auf den Datenschutz?**

Bei Anliegen zur Datenverarbeitung und zur Einhaltung der datenschutzrechtlichen Anforderungen sollten Sie sich in erster Linie an die Studienleitung (siehe Seite 1) wenden. Sie können Sie sich auch an folgende Datenschutzbeauftragte wenden:

Datenschutzbeauftragter der Universität zu Köln  
dsb@verw.uni-koeln.de  
0221-470-0

Datenschutzbeauftragter der Uniklinik Köln  
datenschutz@uk-koeln.de  
0221-478-39046

Sie haben außerdem ein Beschwerderecht bei jeder Aufsichtsbehörde für den Datenschutz. Eine Liste der Aufsichtsbehörden in Deutschland finden Sie unter

[https://www.bfdi.bund.de/DE/Infothek/Anschriften\\_Links/anschriften\\_links-node.html](https://www.bfdi.bund.de/DE/Infothek/Anschriften_Links/anschriften_links-node.html)

Die für die Studienleitung zuständige Datenschutzaufsichtsbehörde ist:

Landesbeauftragte für Datenschutz und Informationsfreiheit Nordrhein-Westfalen  
Postfach 20 04 44, 40102 Düsseldorf  
Kavalleriestraße 2-4, 40213 Düsseldorf  
Tel.: 0211-384-24-0  
Fax: 0211-384-24-10  
E-Mail: [poststelle@ldi.nrw.de](mailto:poststelle@ldi.nrw.de)

### **Probandenversicherung**

Da weder studienbedingte Risiken für die Gesundheit bestehen, noch studienbedingte Wege anfallen (diese Studie wird bei Ihnen vor Ort bzw. telefonisch erfolgen), wurden für die Studie keine Probandenversicherung und keine Wegeunfallversicherung abgeschlossen.

### **Mögliche Gründe für ein vorzeitiges Studienende**

Der Sponsor hat das Recht, die Studie vorzeitig abzubrechen, wenn es relevante medizinische oder ethische Bedenken gibt oder wenn der Abschluss der Studie nicht mehr praktikabel ist. Wenn eine solche Maßnahme ergriffen wird, werden die Gründe für den Abbruch der Studie dokumentiert.

Ein vorzeitiger Abbruch der Studie wird in Betracht gezogen, wenn:

- sich das Nutzen-Risiko-Verhältnis für die Studienteilnehmer deutlich ändert
- es nicht mehr ethisch vertretbar ist, die Studie weiter fortzusetzen
- es nicht mehr praktikabel ist, die Studie abzuschließen
- identische Studien bessere Ergebnisse hinsichtlich einer Care und Case Management Intervention oder der Standardversorgung für schwer betroffene MS Patienten und deren Bezugspersonen zeigen

Der Sponsor entscheidet in Absprache mit der Studienleitung, der stellvertretenden Studienleitung und dem Studienstatistiker über den Abbruch der Studie.

### **Aufwandsentschädigung und Kostenerstattung**

Eine Aufwandsentschädigung wird Ihnen für Ihre Teilnahme an der Studie nicht gezahlt.

Es entstehen Ihnen und Ihrer Krankenkasse keinerlei Kosten durch die Teilnahme an der Studie.

### **Information über neue Erkenntnisse**

Ihr Studienarzt wird Sie in einer angemessenen Frist auch über jede Änderung und weitere wichtige, während der Studie bekanntwerdende Informationen in Kenntnis setzen, die Ihre Einwilligung zur weiteren Teilnahme beeinflussen könnte.

**Haben Sie weitere Fragen?**

Sollten Sie noch weitere Fragen zum Ablauf der Studie, zum Datenschutz, zu Ihren Rechten, usw. haben, wenden Sie sich bitte an die studienbedingte Ansprechpartnerin. Die Kontaktdaten finden Sie auf der ersten Seite.

**Wir freuen uns sehr über Ihre Unterstützung und bedanken uns bereits jetzt für Ihre Zeit dieses Schreiben zu lesen.**

---

Frau PD Dr. Heidrun Golla  
Zentrum für Palliativmedizin  
Uniklinik Köln

Herr PD Dr. Clemens Warnke  
Klinik und Poliklinik für Neurologie  
Uniklinik Köln

**UNIKLINIK  
KÖLN****Zentrum für  
Palliativmedizin****UNIKLINIK  
KÖLN****Klinik und Poliklinik  
für Neurologie****Studienleitung:**

PD Dr. Heidrun Golla  
Zentrum für Palliativmedizin  
Uniklinik Köln

**Stellvertretende Studienleitung:**

PD Dr. Clemens Warnke  
Klinik und Poliklinik für Neurologie  
Uniklinik Köln

**Ansprechpartnerin:**

Dr. Veronika Dunkl  
Zentrum für Palliativmedizin  
Uniklinik Köln  
Tel.: 0221-478-50989  
E-Mail: veronika.dunkl@uk-koeln.de

## Einwilligungserklärung

- Ich habe die Information erhalten und wurde über Wesen, Bedeutung, Tragweite und Risiken des geplanten Vorhabens informiert. Mir wurde ausreichend Gelegenheit gegeben, alle offenen Fragen zu klären. Ich habe jederzeit das Recht, weitere Informationen zur Studie zu erfragen.
- Ich erkläre mich freiwillig bereit, an der Studie teilzunehmen.
- Ich habe jederzeit das Recht, ohne Angabe von Gründen von der Studie zurückzutreten, ohne dass für mich Nachteile in der medizinischen Behandlung daraus entstehen.

## Einwilligungserklärung zum Datenschutz

Bei dieser wissenschaftlichen Studie werden personenbezogene Daten über Sie erhoben und zugriffsbeschränkt am Studienzentrum aufbewahrt und die elektronisch erfassten Daten pseudonymisiert auf dem zentralen Studien-Datenserver am Zentrum für Klinische Studien (ZKS) der Medizinischen Fakultät der Universität zu Köln gespeichert werden. Die Speicherung, Weitergabe und Auswertung dieser Daten erfolgt gemäß gesetzlichen Bestimmungen und setzt vor Teilnahme an der Studie die folgende freiwillige Einwilligung voraus:

1. Ich erkläre mich damit einverstanden, dass im Rahmen dieser Studie erhobene Daten (auf Fragebögen und elektronischen Datenträgern) in pseudonymisierter Form (ohne Namensnennung) aufgezeichnet und weitergegeben werden an:

- die Studienleitung oder eine von dieser beauftragten Stelle zum Zweck der wissenschaftlichen Auswertung
- im Falle unerwünschter Ereignisse: die Studienleitung

2. Außerdem erkläre ich mich damit einverstanden, dass autorisierte und zur Verschwiegenheit verpflichtete Beauftragte der Studienleitung, Hilfspersonal der Prüfer und Beauftragte des Sponsors (Monitore, Auditoren) und Inspektoren in meine beim Studienarzt vorhandenen personenbezogenen Daten Einsicht nehmen können, soweit dies zur Überprüfung der Studie notwendig ist. Für diese Maßnahme entbinde ich den Studienarzt von der ärztlichen Schweigepflicht.

3. Ich erkläre mich damit einverstanden, dass meine Daten nach Beendigung oder Abbruch der Studie mindestens zehn Jahre nach Ende der Studie gemäß wissenschaftlichem Standard

**aufbewahrt werden. Danach werden meine personenbezogenen Daten gelöscht oder anonymisiert.**

**4. Ich bin darüber aufgeklärt worden, dass ich jederzeit die Teilnahme an der Studie beenden kann. In diesem Falle werden bereits erhobene Daten gelöscht oder vollständig anonymisiert.**

**5. Ich habe die Informationen zum Datenschutz zur Kenntnis genommen und willige in die Datenverarbeitung ein.**

**Ja**                       **Nein**

Ich habe die vollständige Probandeninformation zur Studie sowie ein unterschriebenes Exemplar dieser Einwilligungserklärung erhalten.

.....  
Vor- und Nachname des Studienteilnehmers (in Druckbuchstaben)

.....  
Ort und Datum (persönlich auszufüllen)

.....  
Unterschrift des Studienteilnehmers

Ich habe das Aufklärungsgespräch geführt und die Einwilligung des Studienteilnehmers eingeholt.

.....  
Vor- und Nachname des Studienarztes (in Druckbuchstaben)

.....  
Ort und Datum (persönlich auszufüllen)

.....  
Unterschrift des Studienarztes

**UNIKLINIK  
KÖLN****Zentrum für  
Palliativmedizin****UNIKLINIK  
KÖLN****Klinik und Poliklinik  
für Neurologie****Studienleitung:**

PD Dr. Heidrun Golla  
Zentrum für Palliativmedizin  
Uniklinik Köln

**Stellvertretende Studienleitung:**

PD Dr. Clemens Warnke  
Klinik und Poliklinik für Neurologie  
Uniklinik Köln

**Ansprechpartnerin:**

Dr. Veronika Dunkl  
Zentrum für Palliativmedizin  
Uniklinik Köln  
Tel.: 0221-478-50989  
E-Mail: veronika.dunkl@uk-koeln.de

**Einwilligungserklärung (zum qualitativen Teil der Studie)**

- Ich habe die Information erhalten und wurde über Wesen, Bedeutung, Tragweite und Risiken des geplanten Vorhabens informiert. Mir wurde ausreichend Gelegenheit gegeben, alle offenen Fragen zu klären. Ich habe jederzeit das Recht, weitere Informationen zur Studie zu erfragen.
- Ich erkläre mich freiwillig bereit, an der Studie teilzunehmen.
- Ich habe jederzeit das Recht, ohne Angabe von Gründen von der Studie zurückzutreten, ohne dass für mich Nachteile in der medizinischen Behandlung daraus entstehen.

**Einwilligungserklärung zum Datenschutz**

Bei dieser wissenschaftlichen Studie werden personenbezogene Daten über Sie erhoben und zugriffsbeschränkt am Studienzentrum aufbewahrt und die elektronisch erfassten Daten pseudonymisiert auf dem zentralen Studien-Datenserver am Zentrum für Klinische Studien (ZKS) der Medizinischen Fakultät der Universität zu Köln gespeichert werden. Die Speicherung, Weitergabe und Auswertung dieser Daten erfolgt gemäß gesetzlichen Bestimmungen und setzt vor Teilnahme an der Studie die folgende freiwillige Einwilligung voraus:

1. Ich erkläre mich damit einverstanden, dass im Rahmen dieser Studie erhobene Daten (auf Fragebögen und elektronischen Datenträgern) in pseudonymisierter Form (ohne Namensnennung) aufgezeichnet und weitergeben werden an:

- die Studienleitung oder eine von dieser beauftragten Stelle zum Zweck der wissenschaftlichen Auswertung
- im Falle unerwünschter Ereignisse: die Studienleitung

2. Außerdem erkläre ich mich damit einverstanden, dass autorisierte und zur Verschwiegenheit verpflichtete Beauftragte der Studienleitung, Hilfspersonal der Prüfer und Beauftragte des Sponsors (Monitore, Auditoren) und Inspektoren in meine beim Studienarzt vorhandenen personenbezogenen Daten Einsicht nehmen können, soweit dies zur Überprüfung der Studie notwendig ist. Für diese Maßnahme entbinde ich den Studienarzt von der ärztlichen Schweigepflicht.

3. Ich erkläre mich damit einverstanden, dass meine Daten nach Beendigung oder Abbruch der Studie mindestens zehn Jahre nach Ende der Studie gemäß wissenschaftlichem Standard

**aufbewahrt werden. Danach werden meine personenbezogenen Daten gelöscht oder anonymisiert.**

**4. Ich bin darüber aufgeklärt worden, dass ich jederzeit die Teilnahme an der Studie beenden kann. In diesem Falle werden bereits erhobene Daten gelöscht oder vollständig anonymisiert.**

**5. Ich habe die Informationen zum Datenschutz zur Kenntnis genommen und willige in die Datenverarbeitung ein.**

**6. Ich bin ich damit einverstanden, dass das Interview auf Tonband aufgezeichnet wird und die Daten in pseudonymisierter Form (ohne Namensnennung) im Rahmen der Studie verwendet werden.**

**Ja**                       **Nein**

Ich habe die vollständige Probandeninformation zur Studie sowie ein unterschriebenes Exemplar dieser Einwilligungserklärung erhalten.

.....  
Vor- und Nachname des Studienteilnehmers (in Druckbuchstaben)

.....  
Ort und Datum (persönlich auszufüllen)

.....  
Unterschrift des Studienteilnehmers

Ich habe das Aufklärungsgespräch geführt und die Einwilligung des Studienteilnehmers eingeholt.

.....  
Vor- und Nachname des Studienarztes (in Druckbuchstaben)

.....  
Ort und Datum (persönlich auszufüllen)

.....  
Unterschrift des Studienarztes

**UNIKLINIK  
KÖLN****Zentrum für  
Palliativmedizin****Studienleitung:**

PD Dr. Heidrun Golla  
Zentrum für Palliativmedizin  
Uniklinik Köln

**Ansprechpartnerin:**

Dr. Veronika Dunkl  
Zentrum für Palliativmedizin  
Uniklinik Köln  
Tel.: 0221-478-50989  
E-Mail: veronika.dunkl@uk-koeln.de

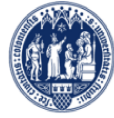**UNIKLINIK  
KÖLN****Klinik und Poliklinik  
für Neurologie****Stellvertretende Studienleitung:**

PD Dr. Clemens Warnke  
Klinik und Poliklinik für Neurologie  
Uniklinik Köln

**Die Verantwortung für die Studie liegt bei:**

PD Dr. Heidrun Golla  
Zentrum für Palliativmedizin  
Uniklinik Köln  
Kerpener Str. 62, 50937 Köln  
Tel.: 0221-478-3368  
E-Mail: heidrun.golla@uk-koeln.de

**Lokal verantwortliche Studienärzte<sup>1</sup> am Studienzentrum (jeweils am Zentrum für Palliativmedizin und der Klinik und Poliklinik für Neurologie):**

PD Dr. Heidrun Golla  
Zentrum für Palliativmedizin  
Uniklinik Köln  
Kerpener Str. 62, 50937 Köln  
Tel.: 0221-478-3368  
E-Mail: heidrun.golla@uk-koeln.de

PD Dr. Clemens Warnke  
Klinik und Poliklinik für Neurologie  
Uniklinik Köln  
Kerpener Str. 62, 50937 Köln  
Tel.: 0221-478-6188  
E-Mail: clemens.warnke@uk-koeln.de

**Information über die Teilnahme an der Studie**

Sehr geehrte Dame, sehr geehrter Herr,

wir freuen uns, dass Sie an unserer Studie zur „Kommunikation, Koordination und Sicherheit für Menschen mit Multipler Sklerose (KOKOS-MS)“ interessiert sind und uns eventuell durch Ihre Teilnahme hierbei unterstützen möchten. Im Folgenden möchten wir Sie über die Ziele und den Verlauf der Studie informieren und Ihnen erklären, warum Ihre Mitarbeit im Falle einer Studienteilnahme wichtig ist. Die Studie wird zu Forschungszwecken durchgeführt.

<sup>1</sup> Im Interesse einer besseren Lesbarkeit wird nicht ausdrücklich in geschlechtsspezifischen Personenbezeichnungen differenziert. Die gewählte männliche Form schließt eine adäquate weibliche Form gleichberechtigt ein.



Wir bitten Sie, diese Information sorgfältig zu lesen und anschließend zu entscheiden, ob Sie an dieser Studie teilnehmen möchten oder nicht.

Ihre Teilnahme an dieser Studie ist freiwillig. Sie werden in diese Studie also nur dann einbezogen, wenn Sie dazu schriftlich Ihre Einwilligung erklären. Sofern Sie nicht an der Studie teilnehmen oder später Ihre Einwilligung widerrufen, entstehen Ihnen daraus keine Nachteile.

Ein geschulter Studienmitarbeiter hat Ihnen bereits eine Reihe von Informationen zu der geplanten Studie gegeben. Der nachfolgende Text soll Sie über die wichtigen Aspekte der Studie, insbesondere die Ziele und den Ablauf informieren. Lesen Sie die Teilnehmerinformation bitte sorgfältig und gewissenhaft. Anschließend wird ein geschulter Studienmitarbeiter das Aufklärungsgespräch mit Ihnen führen. Bitte zögern Sie nicht, alle Punkte anzusprechen, die Ihnen unklar sind. Sie werden danach ausreichend Bedenkzeit erhalten, um über Ihre Teilnahme zu entscheiden.

### **Ziel der Studie**

Studien und eigene klinische Erfahrungen zeigen, dass schwer betroffene MS Patienten und ihre An-/Zugehörigen (im Folgenden als Bezugspersonen bezeichnet) oftmals einen kontinuierlichen koordinierenden Ansprechpartner vermissen, der gemeinsam mit ihnen ihre Bedarfe definiert und ordnet, sich für ihre Belange einsetzt und verschiedene Abläufe koordiniert, im Sinne einer „Prozesskoordination“. Solche Aufgaben können durch einen sogenannten „Fallmanager“ übernommen werden. Seine Tätigkeit wird auch als „Care und Case Management“ bezeichnet und konnte bereits für verschiedene Patientengruppen die Koordinationsabläufe vereinfachen, Lebensqualität verbessern und Sozial- und Gesundheitskosten senken. Bislang fehlt der Nachweis dieser positiven Effekte jedoch noch für schwer betroffene MS Patienten sowie für deren Bezugspersonen. Ziel dieser Studie ist die Evaluation eines solchen Care und Case Management Dienstes bei schwerer MS, der die insgesamt 80 Patienten und deren Bezugspersonen über einen längeren Zeitraum (in dieser Studie über 12 Monate) in Gesundheits- und Sozialversorgungsbelangen begleitet. Hierbei sollen Anliegen der Patienten aber auch der Bezugspersonen Berücksichtigung finden. Dies erfolgt sektorenübergreifend, d.h. unabhängig davon, ob sich Patienten gerade ambulant oder stationär in Behandlung befinden. Von der Durchführung dieser Studie erhoffen wir uns, die Versorgung der MS Patienten und deren Bezugspersonen zukünftig verbessern zu können.

### **Art der Studie**

Bei der Studie handelt es sich um eine sogenannte „qualitative“ Datenerhebung durch Gruppendiskussionen und ggfls. Einzelinterviews. Die qualitative Forschung beschreibt eine Methode in der Wissenschaft, um detaillierte, ausführliche Informationen zu erheben und interpretativ auszuwerten. Es wird viel mit offenen Fragestellungen und nicht standardisierten Verfahren gearbeitet.

Die Studie wird unter dem Förderkennzeichen 01VSF19029 vom Innovationsausschuss beim Gemeinsamen Bundesausschuss (GBA) gefördert.

Die Ethikkommission der Medizinischen Fakultät zu Köln hat die vorliegende Studie am 19.11.2020 beraten und zustimmend bewertet.

## Wer kann an der Studie teilnehmen?

An dieser wissenschaftlichen Studie können volljährige Fachkräfte aus dem Gesundheitswesen (z.B. Neurologen, Hausärzte, Ko-Therapeuten, Pflegekräfte) teilnehmen, die ihr schriftliches Einverständnis zur Teilnahme an der Studie gegeben haben.

Nicht teilnehmen können solche Fachkräfte, die keine ausreichenden Deutschkenntnisse besitzen oder die nicht schriftlich eingewilligt haben.

Insgesamt beträgt die geplante Laufzeit 40 Monate und wird voraussichtlich Ende 2023 abgeschlossen sein. Die **Gruppendiskussionen** (und ggfls. Einzelinterviews) werden höchstwahrscheinlich im Zeitraum April 2022 – April 2023 stattfinden.

## Mögliche Risiken/Belastungen/Nebenwirkungen, die mit der Teilnahme verbunden sind

Die Teilnahme an der Studie ist für Sie mit keinen medizinischen Risiken verbunden.

Die Teilnahme an der Studie ist mit einem Zeitaufwand für Sie verbunden. Insgesamt schätzen wir den zeitlichen Gesamtaufwand einer Gruppendiskussion mit ca. 1,5 Stunden für Sie als zumutbar ein. Ein eventuelles Einzelinterview wird voraussichtlich 30-60 Minuten Ihrer Zeit in Anspruch nehmen.

## Möglicher Nutzen durch die Teilnahme

Sie werden durch die Teilnahme an dieser Studie voraussichtlich keinen persönlichen Nutzen haben. Mit Ihrer Teilnahme helfen Sie jedoch mit, die Versorgung der MS Patienten und deren Bezugspersonen zukünftig zu verbessern.

## Geplante Maßnahmen und Ablauf der Teilnahme

Um Patienten und deren Bezugspersonen eine bedürfnisorientierte Versorgung und Begleitung zu ermöglichen, ist es notwendig, alle daran beteiligten Berufsgruppen einzubeziehen und zu befragen. Dazu werden wir insgesamt fünf Gruppendiskussionen mit Fachkräften aus dem Gesundheitswesen durchführen. **Wir möchten Sie herzlich einladen an einer dieser Gruppendiskussion teilzunehmen.** Die Teilnehmerzahl pro Gruppendiskussion beläuft sich auf drei bis zwölf Personen. Damit erfüllen wir die Kriterien qualitativer Sozialforschung für Fokusgruppen. Eigene Studien zeigen zudem, dass diese Gruppengröße gut durchführbar ist. Wir streben also eine Gesamtstudienteilnehmerzahl von n=15-60 für die Gruppendiskussionen an. Die Dauer einer Fokusgruppe erstreckt sich auf circa 1,5 Stunden. Durchgeführt werden die Fokusgruppen von geschulten Studienmitarbeitern. Zu Analyse Zwecken wird das Interview auf Tonband aufgezeichnet und wörtlich in einen Text überführt (Transkription) werden. Die Gruppendiskussionen finden entweder in Ihren Räumlichkeiten oder in den Räumen der Uniklinik Köln statt. Etwaige Reisekosten übernehmen wir selbstverständlich gerne.

Sollten Sie es zeitlich nicht einrichten können an einer der Gruppendiskussionen teilzunehmen, möchten Ihre Erfahrungen aber dennoch mit uns teilen, so besteht gegebenenfalls die Möglichkeit einen Termin für ein persönliches Einzelinterview mit Ihnen zu vereinbaren.

## Datenverarbeitung und Datenschutz

Im Rahmen der Studie werden Ihre Daten einschließlich der Daten über Geschlecht, Alter, Beruf, Arbeitsstelle, Berufserfahrung, PLZ des Arbeitsorts pseudonymisiert, das heißt, dass die personenbezogenen Daten wie der Name und das Geburtsdatum ohne Hinzuziehung einer Codeliste nicht mehr einer konkreten Person zugeordnet werden können. Die personenbezogenen Daten werden durch einen Nummern- und/oder Buchstabencode ersetzt. Im Studienzentrum ist eine Liste hinterlegt (elektronisch und in Papierform), auf der die Namen den Nummern- und/oder Buchstabencodes zugeordnet sind. Diese Liste wird im Studienzentrum gesondert und unter Verschluss bzw. zugriffsbeschränkt aufbewahrt und unterliegt dort technischen und organisatorischen Maßnahmen, die gewährleisten, dass die personenbezogenen Daten Ihnen durch unbefugte Personen nicht zugeordnet werden können. Eine Entschlüsselung erfolgt nur unter den vom Gesetz vorgeschriebenen Voraussetzungen. Zugriff auf diese Listen haben nur zuständige und zur Verschwiegenheit verpflichtete Mitarbeiter des Studienzentrums.

Die Rechtsgrundlage für die Datenverarbeitung ist Ihre freiwillige, schriftliche Einwilligung.

Die im Rahmen der Studie erhobenen Daten werden von einem elektronischen Datensystem erfasst und statistisch ausgewertet. Nach Beendigung der Studie werden alle Daten über einen Zeitraum von 10 Jahren gemäß wissenschaftlichem Standard in einem sicheren System gespeichert und archiviert. Im Anschluss werden Ihre Daten gelöscht oder anonymisiert. Anonymisiert heißt, dass der Zuordnungscode gelöscht wird und die Daten ggf. so weiter verändert werden, dass sie in keiner Weise Ihrer Person zugeordnet werden können.

Die Verarbeitung der erhobenen Daten erfolgt in Verantwortung der Studienleitung (s. Seite 1).

Sie haben das Recht auf Auskunft sowie Einsichtnahme über die Sie betreffenden personenbezogenen Daten, die im Rahmen der Studie erhoben, verarbeitet oder ggf. an Dritte übermittelt werden.

Sollten Sie dabei Fehler in Ihren Daten feststellen, so haben Sie das Recht, diese berichtigen zu lassen. Ferner haben Sie das Recht eine kostenfreie Kopie dieser Daten zu erhalten.

Sie haben auch das Recht, eine Löschung der über Sie gespeicherten Daten zu verlangen.

Die Daten werden zu jeder Zeit vertraulich behandelt. Die pseudonymisierten Daten werden der Studienleitung zur Verfügung gestellt. Zugriff auf die personenbezogenen und -identifizierenden Daten haben nur die zuständigen Personen im jeweiligen Studienzentrum. Diese unterliegen der ärztlichen Schweigepflicht (§ 203 StGB) und sind an die Wahrung des Datengeheimnisses (§6 DSGVO NRW) gebunden.

Wissenschaftliche Veröffentlichungen von Ergebnissen erfolgen ausschließlich anonymisiert, also in einer Form, die keine Rückschlüsse auf Ihre Person zulässt.

Die ordnungsgemäße Durchführung der Studie, insbesondere die ordnungsgemäße Erhebung der Daten sowie deren Zuordnung zu bestimmten Teilnehmer, können von Beauftragten der

Studienleitung, Hilfspersonal der Prüfer und Beauftragen des Sponsors (Monitore, Auditoren) und Inspektoren auch durch direkte Einsicht in die beim Studienarzt vorliegenden personenbezogenen (d.h. in Verbindung mit Ihrem Namen genannten) Daten überprüft werden. Diese sind zur Verschwiegenheit verpflichtet und dürfen Ihre Daten nur in pseudonymisierter Form weitergeben und keine Kopien oder Abschriften von Ihren Unterlagen erstellen.

### **Sind mit der Datenverarbeitung Risiken verbunden?**

Bei jeder Erhebung, Speicherung, Nutzung und Übermittlung von Daten bestehen Vertraulichkeitsrisiken (z.B. die Möglichkeit, die betreffende Person zu identifizieren). Diese Risiken lassen sich nicht völlig ausschließen und steigen, je mehr Daten miteinander verknüpft werden können. Die Studienleitung versichert Ihnen, alles nach dem Stand der Technik Mögliche zum Schutz Ihrer Privatsphäre zu tun und Daten nur an Stellen weiterzugeben, die ein geeignetes Datenschutzkonzept vorweisen können. Medizinische Risiken sind mit der Datenverarbeitung nicht verbunden.

Im Rahmen der Gruppendiskussionen (und ggfls. persönlichen Einzelinterviews) erstellen wir eine Tonbandaufnahme und lassen es anschließend wörtlich verschriftlichen (Transkription). Dabei werden die Aufzeichnungen mit einem Ersatznamen versehen, damit die Inhalte nicht mit Ihrer Person in Verbindung gebracht werden können. Wir weisen jedoch darauf hin, dass insbesondere aufgrund Ihrer Stimme und ggf. der ausgesprochenen Inhalte eine Re-Identifizierung nicht ausgeschlossen werden kann. Die Tonaufnahme ist lediglich projektinternen Mitarbeitern zugänglich sowie der professionell transkribierenden Person, die vor Erhalt der Tonbandaufnahme eine Vertraulichkeitserklärung unterschreibt und das Transkript nach Erstellung an das Forschungsteam, ohne eine Vervielfältigung vorgenommen zu haben, zurückgibt. Die Tonbandaufnahmen sowie die Transkripte werden nur für die Auswertung der Untersuchung genutzt. Sie werden ebenfalls mit einer zufälligen Kennnummer (Pseudonymisierung) gespeichert. Alle Personen-, Orts- und Straßennamen werden durch die Bezeichnung „Ort X“ oder „Straße XY“ unkenntlich genannt. Einzelne Zitate werden möglicherweise in wissenschaftlichen Arbeiten veröffentlicht, dabei ist nicht erkennbar, von welcher Person diese stammen.

Für die Sicherheit und Instandhaltung der elektronischen Infrastruktur am Studienzentrum ist IT-Abteilung der UKK (UK-IT) zuständig.

### **Kann ich meine Einwilligung widerrufen?**

Sie können Ihre jeweilige Einwilligung jederzeit ohne Angabe von Gründen schriftlich oder mündlich widerrufen, ohne dass Ihnen daraus ein Nachteil entsteht. Wenn Sie Ihre Einwilligung widerrufen, werden keine weiteren Daten mehr erhoben.

### **Welche weiteren Rechte habe ich bezogen auf den Datenschutz?**

Bei Anliegen zur Datenverarbeitung und zur Einhaltung der datenschutzrechtlichen Anforderungen sollten Sie sich in erster Linie an die Studienleitung (siehe Seite 1) wenden. Sie können Sie sich auch an folgende Datenschutzbeauftragte wenden:

Datenschutzbeauftragter der Universität zu Köln  
dsb@verw.uni-koeln.de  
0221-470-0

Datenschutzbeauftragter der Uniklinik Köln  
datenschutz@uk-koeln.de  
0221-478-39046

Sie haben außerdem ein Beschwerderecht bei jeder Aufsichtsbehörde für den Datenschutz. Eine Liste der Aufsichtsbehörden in Deutschland finden Sie unter

[https://www.bfdi.bund.de/DE/Infothek/Anschriften\\_Links/anschriften\\_links-node.html](https://www.bfdi.bund.de/DE/Infothek/Anschriften_Links/anschriften_links-node.html)

Die für die Studienleitung zuständige Datenschutzaufsichtsbehörde ist:

Landesbeauftragte für Datenschutz und Informationsfreiheit Nordrhein-Westfalen  
Postfach 20 04 44, 40102 Düsseldorf  
Kavalleriestraße 2-4, 40213 Düsseldorf  
Tel.: 0211-384-24-0  
Fax: 0211-384-24-10  
E-Mail: [poststelle@ldi.nrw.de](mailto:poststelle@ldi.nrw.de)

### **Wege-Unfallversicherung**

Falls die Gruppendiskussion in den Räumen der Uniklinik stattfindet, ist eine Wege-Unfallversicherung bereitgestellt, die sich auf Unfälle auf dem direkten Weg von Ihrem Wohnort zur Uniklinik bezieht. Die Ersatzleistung bei Invalidität beträgt **XXX** Euro; im Todesfall **XXX** Euro.

#### **Name und Anschrift des Versicherers:**

**Telefon:**

**Fax:**

**Versicherungsscheinnummer:**

Der genaue Umfang des Versicherungsschutzes ergibt sich aus den Ihnen bei Studieneinschluss ausgehändigten Versicherungsunterlagen.

Wir möchten Sie bitten, in den Allgemeinen Versicherungsbedingungen insbesondere folgende Abschnitte zu beachten:

**XXX** Umfang der Versicherungsleistungen

**XXX** Information zu den Versicherungsausschlüssen

**XXX** Ihre Obliegenheiten und Verhalten beim Eintreten eines Versicherungsfalls

Sie erhalten ein Exemplar der Versicherungsbestätigung einschließlich der Allgemeinen Versicherungsbedingungen.

Falls für Sie anstelle der Gruppendiskussion nur ein persönliches Einzelinterview in Frage kommt, wird dieses dort stattfinden, wo Sie sich befinden (z.B. bei Ihnen auf der Arbeitsstelle), wodurch keine studienbedingten Wege anfallen, so dass in diesem Fall keine Wege-Unfallversicherung notwendig ist.

### **Mögliche Gründe für ein vorzeitiges Studienende**

Der Sponsor hat das Recht, die Studie vorzeitig abzubrechen, wenn es relevante medizinische oder ethische Bedenken gibt oder wenn der Abschluss der Studie nicht mehr praktikabel ist. Wenn eine solche Maßnahme ergriffen wird, werden die Gründe für den Abbruch der Studie dokumentiert.

Ein vorzeitiger Abbruch der Studie wird in Betracht gezogen, wenn:

- sich das Nutzen-Risiko-Verhältnis für die Studienteilnehmer deutlich ändert
- es nicht mehr ethisch vertretbar ist, die Studie weiter fortzusetzen
- es nicht mehr praktikabel ist, die Studie abzuschließen
- identische Studien bessere Ergebnisse hinsichtlich einer Care und Case Management Intervention oder der Standardversorgung für schwer betroffene MS Patienten und deren Bezugspersonen zeigen

Der Sponsor entscheidet in Absprache mit der Studienleitung, der stellvertretenden Studienleitung und dem Studienstatistiker über den Abbruch der Studie.

### **Aufwandsentschädigung und Kostenerstattung**

Es entstehen Ihnen und Ihrer Krankenkasse keinerlei Kosten durch die Teilnahme an der Studie. Für Ihre Teilnahme an der Gruppendiskussion (bzw. gegebenenfalls an einem persönlichen Einzelinterview) erhalten Sie eine kleine Aufwandsentschädigung. Eventuelle Fahrtkosten werden Ihnen in Höhe der UKK-üblichen Kilometerpauschale erstattet oder nach entsprechender Vorlage der Fahrscheine erstattet.

### **Information über neue Erkenntnisse**

Der geschulte Studienmitarbeiter wird Sie in einer angemessenen Frist auch über jede Änderung und weitere wichtige, während der Studie bekanntwerdende Informationen in Kenntnis setzen, die Ihre Einwilligung zur weiteren Teilnahme beeinflussen könnte.

### **Haben Sie weitere Fragen?**

Sollten Sie noch weitere Fragen zum Ablauf der Studie, zum Datenschutz, zu Ihren Rechten, usw. haben, wenden Sie sich bitte an die studienbedingte Ansprechpartnerin. Die Kontaktdaten finden Sie auf der ersten Seite.

**Wir freuen uns sehr über Ihre Unterstützung und bedanken uns bereits jetzt für Ihre Zeit dieses Schreiben zu lesen.**

---

Frau PD Dr. Heidrun Golla  
Zentrum für Palliativmedizin  
Uniklinik Köln

Herr PD Dr. Clemens Warnke  
Klinik und Poliklinik für Neurologie  
Uniklinik Köln

**UNIKLINIK  
KÖLN****Zentrum für  
Palliativmedizin****UNIKLINIK  
KÖLN****Klinik und Poliklinik  
für Neurologie****Studienleitung:**

PD Dr. Heidrun Golla  
Zentrum für Palliativmedizin  
Uniklinik Köln

**Stellvertretende Studienleitung:**

PD Dr. Clemens Warnke  
Klinik und Poliklinik für Neurologie  
Uniklinik Köln

**Ansprechpartnerin:**

Dr. Veronika Dunkl  
Zentrum für Palliativmedizin  
Uniklinik Köln  
Tel.: 0221-478-50989  
E-Mail: veronika.dunkl@uk-koeln.de

## Einwilligungserklärung

- Ich habe die Information erhalten und wurde über Wesen, Bedeutung, Tragweite und Risiken des geplanten Vorhabens informiert. Mir wurde ausreichend Gelegenheit gegeben, alle offenen Fragen zu klären. Ich habe jederzeit das Recht, weitere Informationen zur Studie zu erfragen.
- Ich erkläre mich freiwillig bereit, an der Studie teilzunehmen.
- Ich habe jederzeit das Recht, ohne Angabe von Gründen von der Studie zurückzutreten, ohne dass für mich Nachteile daraus entstehen.

## Einwilligungserklärung zum Datenschutz

Bei dieser wissenschaftlichen Studie werden personenbezogene Daten über Sie erhoben und zugriffsbeschränkt am Studienzentrum aufbewahrt und die elektronisch erfassten Daten pseudonymisiert auf dem zentralen Studien-Datenserver am Studienzentrum gespeichert werden. Die Speicherung, Weitergabe und Auswertung dieser Daten erfolgt gemäß gesetzlichen Bestimmungen und setzt vor Teilnahme an der Studie die folgende freiwillige Einwilligung voraus:

1. Ich erkläre mich damit einverstanden, dass im Rahmen dieser Studie erhobene Daten (auf Fragebögen und elektronischen Datenträgern) in pseudonymisierter Form (ohne Namensnennung) aufgezeichnet und weitergeben werden an:

- die Studienleitung oder eine von dieser beauftragten Stelle zum Zweck der wissenschaftlichen Auswertung
- im Falle unerwünschter Ereignisse: die Studienleitung

2. Außerdem erkläre ich mich damit einverstanden, dass autorisierte und zur Verschwiegenheit verpflichtete Beauftragte der Studienleitung, Hilfspersonal der Prüfer und Beauftragte des Sponsors (Monitore, Auditoren) und Inspektoren in meine beim Studienarzt vorhandenen personenbezogenen Daten Einsicht nehmen können, soweit dies zur Überprüfung der Studie notwendig ist. Für diese Maßnahme entbinde ich den Studienarzt von der ärztlichen Schweigepflicht.

3. Ich erkläre mich damit einverstanden, dass meine Daten nach Beendigung oder Abbruch der Studie mindestens zehn Jahre nach Ende der Studie gemäß wissenschaftlichem Standard aufbewahrt werden. Danach werden meine personenbezogenen Daten gelöscht oder anonymisiert.



**4. Ich bin darüber aufgeklärt worden, dass ich jederzeit die Teilnahme an der Studie beenden kann. In diesem Falle werden bereits erhobene Daten gelöscht oder vollständig anonymisiert.**

**5. Ich habe die Informationen zum Datenschutz zur Kenntnis genommen und willige in die Datenverarbeitung ein.**

**6. Ich bin ich damit einverstanden, dass die Gruppendiskussion (bzw. gegebenenfalls das persönliche Einzelinterview) auf Tonband aufgezeichnet wird und die Daten in pseudonymisierter Form (ohne Namensnennung) im Rahmen der Studie verwendet werden.**

**Ja**

**Nein**

Ich habe die vollständige Probandeninformation zur Studie sowie ein unterschriebenes Exemplar dieser Einwilligungserklärung erhalten. Die Versicherungsbestätigung und die Allgemeinen Versicherungsbedingungen zur Wege-Unfallversicherung wurden mir ausgehändigt.

.....  
Vor- und Nachname des Studienteilnehmers (in Druckbuchstaben)

.....  
Ort und Datum (persönlich auszufüllen)

.....  
Unterschrift des Studienteilnehmers

Ich habe das Aufklärungsgespräch geführt und die Einwilligung des Studienteilnehmers eingeholt.

.....  
Vor- und Nachname des Studienmitarbeiters (in Druckbuchstaben)

.....  
Ort und Datum (persönlich auszufüllen)

.....  
Unterschrift des Studienmitarbeiters
