# Supplementary material for: Communication, Coordination, and Security for People with Multiple Sclerosis (COCOS-MS): a randomised phase II clinical trial protocol
Source: HighWire-hosted journal article supplement (doi:10.1136/bmjopen-2021-049300), 2022-01-01
Supplement: bmjopen-2021-049300supp002_data_supplement.pdf [file bmjopen-2021-049300supp002_data_supplement.pdf]

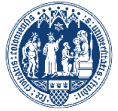

**UNIKLINIK  
KÖLN**

# Care & Case Management Manual – COCOS-MS

Communication, Coordination und Security for people with Multiple Sclerosis

## Content

|                                                                                                                       |    |
|-----------------------------------------------------------------------------------------------------------------------|----|
| Monthly overview.....                                                                                                 | 4  |
| 1. Month 1: Personal data/first assessment/action plan/care plan/cooperation plan/telephone contacts/monitoring ..... | 7  |
| 1.1 Personal data .....                                                                                               | 7  |
| 1.1.1 Patient .....                                                                                                   | 7  |
| 1.1.2 Caregiver .....                                                                                                 | 9  |
| 1.1.3 Crises and emergency contacts .....                                                                             | 10 |
| 1.2. First assessment .....                                                                                           | 11 |
| 1.2.1 Current treatment .....                                                                                         | 11 |
| 1.2.2 Medication.....                                                                                                 | 12 |
| 1.2.3 Assessment .....                                                                                                | 14 |
| 1.3. Action plan/care plan/cooperation plan .....                                                                     | 35 |
| 1.3.1 Action plan.....                                                                                                | 35 |
| 1.3.2 Care plan.....                                                                                                  | 37 |
| 1.3.3 Cooperation plan .....                                                                                          | 40 |
| 1.4 Telephone contacts and monitoring .....                                                                           | 41 |
| 1.4.1 First telephone contact and monitoring.....                                                                     | 41 |
| 1.4.2 Second telephone contact and monitoring.....                                                                    | 43 |
| 1.4.3 Third telephone contact and monitoring .....                                                                    | 44 |
| 2. Month 2: Brief assessment/process control (monitoring, update care plan)/telephone contacts .....                  | 45 |

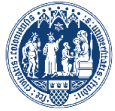

**UNIKLINIK  
KÖLN**

## Care & Case Management Manual – COCOS-MS

Communication, Coordination und Security for people with Multiple Sclerosis

|                                                                                                                                      |    |
|--------------------------------------------------------------------------------------------------------------------------------------|----|
| 2.1 Brief assessment.....                                                                                                            | 45 |
| 2.1.1 Patient .....                                                                                                                  | 46 |
| 2.1.2 Caregiver.....                                                                                                                 | 49 |
| 2.2 Monitoring.....                                                                                                                  | 52 |
| 2.3 Telephone contacts and monitoring .....                                                                                          | 54 |
| 2.3.1 First telephone contact and monitoring.....                                                                                    | 54 |
| 2.3.2 Second telephone contact and monitoring.....                                                                                   | 55 |
| 2.3.3 Third telephone contact and monitoring .....                                                                                   | 56 |
| 3. Month 3: Follow-up assessment/evaluation of participation/process control (monitoring, update care plan)/telephone contacts ..... | 57 |
| 3.1 Follow-up assessment .....                                                                                                       | 57 |
| 3.1.1 Prescribed medication and pro re nata medication.....                                                                          | 57 |
| 3.1.2 Patient .....                                                                                                                  | 59 |
| 3.1.3. Caregiver.....                                                                                                                | 75 |
| 3.2 Evaluation of participation .....                                                                                                | 80 |
| 3.3 Monitoring.....                                                                                                                  | 81 |
| 3.4 Telephone contacts and monitoring .....                                                                                          | 82 |
| 3.4.1 First telephone contact and monitoring.....                                                                                    | 82 |
| 3.4.2 Second telephone contact and monitoring.....                                                                                   | 83 |
| 3.4.3 Third telephone contact and monitoring .....                                                                                   | 84 |
| 4. Month 4: Brief assessment/process control (monitoring, update care plan)/telephone contacts .....                                 | 85 |
| 5. Month 5: Brief assessment/process control (monitoring, update care plan)/telephone contacts .....                                 | 86 |



**UNIKLINIK  
KÖLN**

## Care & Case Management Manual – COCOS-MS

Communication, Coordination und Security for people with Multiple Sclerosis

|                                                                                                                                                             |     |
|-------------------------------------------------------------------------------------------------------------------------------------------------------------|-----|
| 6. Month 6: Follow-up assessment/evaluation of participation/process control (monitoring, update care plan)/telephone contacts .....                        | 87  |
| 7. Month 7: Brief assessment/process control (monitoring, update care plan) /telephone contacts .....                                                       | 88  |
| 8. Month 8: Follow-up assessment/evaluation of participation/process control (monitoring, update care plan)/telephone contacts .....                        | 89  |
| 9. Month 9: Brief assessment/process control (monitoring, update care plan)/telephone contacts .....                                                        | 90  |
| 10. Month 10: Brief assessment/process control (monitoring, update care plan)/telephone contacts .....                                                      | 91  |
| 11. Month 11: Follow-up assessment/evaluation of participation/process control (monitoring, update care plan)/telephone contacts .....                      | 92  |
| 12. Month 12: Brief assessment/process control (monitoring, update care plan) /telephone contacts/final assessment/evaluation participation/dispensation... | 93  |
| 12.1 Brief assessment.....                                                                                                                                  | 93  |
| 12.2 Monitoring.....                                                                                                                                        | 94  |
| 12.3 Telephone contacts und monitoring .....                                                                                                                | 95  |
| 12.3.1 First telephone contact und monitoring .....                                                                                                         | 95  |
| 12.3.2 Second telephone contact und monitoring.....                                                                                                         | 96  |
| 12.3.3 Third telephone contact und monitoring .....                                                                                                         | 97  |
| 12.4.1 Final assessment.....                                                                                                                                | 98  |
| 12.4.1.1 Patient .....                                                                                                                                      | 98  |
| 12.4.1.2 Caregiver.....                                                                                                                                     | 114 |
| 12.5 Evaluation of participation .....                                                                                                                      | 118 |
| 12.6 Reasons for deviation from goal achievement.....                                                                                                       | 120 |
| 12.7 Dispensation .....                                                                                                                                     | 122 |
| 12.7.1 Lasting cooperation partner .....                                                                                                                    | 122 |



**UNIKLINIK  
KÖLN**

## Care & Case Management Manual – COCOS-MS

Communication, Coordination und Security for people with Multiple Sclerosis

### Monthly overview

The monthly overview is intended to provide an overview of the structure of the study CCM.

Terminology: First assessment, follow-up assessment, brief assessment, final assessment, data collection research

| Week | Month | Content                                                                                           | Research |
|------|-------|---------------------------------------------------------------------------------------------------|----------|
| 0    | 0     | Baseline assessment                                                                               | T0       |
| 1    | 1     | Personal data / first assessment / action plan / care plan / cooperation plan                     |          |
| 2    | 1     | Telephone contact und monitoring                                                                  |          |
| 3    | 1     | Telephone contact und monitoring                                                                  |          |
| 4    | 1     | Telephone contact und monitoring                                                                  |          |
| 5    | 2     | Brief assessment/ process control (monitoring / update care plan)                                 |          |
| 6    | 2     | Telephone contact und monitoring                                                                  |          |
| 7    | 2     | Telephone contact und monitoring                                                                  |          |
| 8    | 2     | Telephone contact und monitoring                                                                  |          |
| 9    | 3     | Follow-up assessment / evaluation participation / process control (monitoring / update care plan) |          |
| 10   | 3     | Telephone contact und monitoring                                                                  |          |
| 11   | 3     | Telephone contact und monitoring                                                                  |          |
| 12   | 3     | Telephone contact und monitoring                                                                  |          |
| 13   | 3     | Follow-up assessment                                                                              | T1       |
| 14   | 4     | Brief assessment / process control (monitoring / update care plan)                                |          |
| 15   | 4     | Telephone contact und monitoring                                                                  |          |
| 16   | 4     | Telephone contact und monitoring                                                                  |          |
| 17   | 4     | Telephone contact und monitoring                                                                  |          |
| 18   | 5     | Brief assessment / process control (monitoring / update care plan)                                |          |
| 19   | 5     | Telephone contact und monitoring                                                                  |          |
| 20   | 5     | Telephone contact und monitoring                                                                  |          |
| 21   | 5     | Telephone contact und monitoring                                                                  |          |
| 22   | 6     | Follow-up assessment / evaluation participation / process control (monitoring / update care plan) |          |



**UNIKLINIK  
KÖLN**

## Care & Case Management Manual – COCOS-MS

Communication, Coordination und Security for people with Multiple Sclerosis

| Week | Month | Content                                                                                           | Research |
|------|-------|---------------------------------------------------------------------------------------------------|----------|
| 23   | 6     | Telephone contact und monitoring                                                                  |          |
| 24   | 6     | Telephone contact und monitoring                                                                  |          |
| 25   | 6     | Telephone contact und monitoring                                                                  |          |
| 26   | 6     | Follow-up assessment                                                                              | T2       |
| 27   | 7     | Brief assessment / process control (monitoring / update care plan)                                |          |
| 28   | 7     | Telephone contact und monitoring                                                                  |          |
| 29   | 7     | Telephone contact und monitoring                                                                  |          |
| 30   | 7     | Telephone contact und monitoring                                                                  |          |
| 31   | 8     | Follow-up assessment / evaluation participation / process control (monitoring / update care plan) |          |
| 32   | 8     | Telephone contact und monitoring                                                                  |          |
| 33   | 8     | Telephone contact und monitoring                                                                  |          |
| 34   | 8     | Telephone contact und monitoring                                                                  |          |
| 35   | 9     | Brief assessment / process control (monitoring / update care plan)                                |          |
| 36   | 9     | Telephone contact und monitoring                                                                  |          |
| 37   | 9     | Telephone contact und monitoring                                                                  |          |
| 38   | 9     | Telephone contact und monitoring                                                                  |          |
| 39   | 9     | Follow-up assessment                                                                              | T3       |
| 40   | 10    | Brief assessment / process control (monitoring / update care plan)                                |          |
| 41   | 10    | Telephone contact und monitoring                                                                  |          |
| 42   | 10    | Telephone contact und monitoring                                                                  |          |
| 43   | 10    | Telephone contact und monitoring                                                                  |          |
| 44   | 11    | Follow-up assessment / evaluation participation / process control (monitoring / update care plan) |          |
| 45   | 11    | Telephone contact und monitoring                                                                  |          |
| 46   | 11    | Telephone contact und monitoring                                                                  |          |
| 47   | 11    | Telephone contact und monitoring                                                                  |          |
| 48   | 12    | Brief assessment / process control (monitoring / update care plan)                                |          |
| 49   | 12    | Telephone contact und monitoring                                                                  |          |
| 50   | 12    | Telephone contact und monitoring                                                                  |          |



UNIKLINIK  
KÖLN

## Care & Case Management Manual – COCOS-MS

Communication, Coordination und Security for people with Multiple Sclerosis

| Week  | Month | Content                                                                           | Research |
|-------|-------|-----------------------------------------------------------------------------------|----------|
| 51    | 12    | Telephone contact und monitoring                                                  |          |
| 52 52 | 12 12 | Final assessment / evaluation participation / dispensation – Follow-up assessment | T4       |

**Important:** The final interview (final assessment/evaluation participation/dispensation) should always be conducted at the end of the CCM process, if possible, even in the event of premature CCM termination. Similarly, a final outcome assessment should be conducted, if possible, should the study be terminated prematurely.



**UNIKLINIK  
KÖLN**

## Care & Case Management Manual – COCOS-MS

Communication, Coordination und Security for people with Multiple Sclerosis

### 1. Month 1: Personal data/first assessment/action plan/care plan/cooperation plan/telephone contacts/monitoring

#### 1.1 Personal data

##### 1.1.1 Patient

Date: |\_\_|\_|\_| |\_\_|\_|\_|\_|\_|\_|

Duration: \_\_\_\_\_

Patient-Code: \_\_\_\_\_

Name: \_\_\_\_\_

Age: \_\_\_\_\_ Gender:  female |  male |  diverse: \_\_\_\_\_

Address: \_\_\_\_\_  
\_\_\_\_\_

#### patient group:

Subgroup 1: highly active MS with indication for & treatment with escalating immunotherapeutic agent

Subgroup 2: primary or secondary chronic progressive MS

with immunotherapeutic treatment options

without immunotherapeutic treatment options

Inpatient facility?  yes |  no

Tel No.: \_\_\_\_\_

E-mail address: \_\_\_\_\_

EDSS score: \_\_\_\_\_ Degree of disability: \_\_\_\_\_

Treatment:  inpatient |  outpatient |  other: \_\_\_\_\_

Native language: \_\_\_\_\_

Occupation:  yes |  no

Working days: \_\_\_\_\_  Mo |  Tu |  We |  Th |  Fr |  Sa |  Su

Weekly hours: \_\_\_\_\_



**UNIKLINIK  
KÖLN**

## Care & Case Management Manual – COCOS-MS

Communication, Coordination und Security for people with Multiple Sclerosis

Informed consent given by:

Patient

Legal guardian or healthcare agent

Name Legal guardian/healthcare agent: \_\_\_\_\_

Address \_\_\_\_\_

Tel No. / E-Mail address: \_\_\_\_\_

Native language: \_\_\_\_\_

Comments on 1.1





**UNIKLINIK  
KÖLN**

## Care & Case Management Manual – COCOS-MS

Communication, Coordination und Security for people with Multiple Sclerosis

### 1.1.3 Crises and emergency contacts

Please enter here which (quickly deployable) actions and contacts (including telephone numbers) are intended for crises and emergency contacts.

| Crisis and emergency situation | Action | Contact |
|--------------------------------|--------|---------|
|                                |        |         |
|                                |        |         |
|                                |        |         |
|                                |        |         |
|                                |        |         |

Notes on 1.3:



**UNIKLINIK  
KÖLN**

## Care & Case Management Manual – COCOS-MS

Communication, Coordination und Security for people with Multiple Sclerosis

### 1.2. First assessment

#### 1.2.1 Current treatment

Date: |\_\_|\_|\_\_|\_|\_\_|\_|\_\_|\_| Duration: \_\_\_\_\_

| Inpatient treatment                                | Outpatient treatment                                     |                                                           |
|----------------------------------------------------|----------------------------------------------------------|-----------------------------------------------------------|
| <input type="checkbox"/> Hospital: neurology       | <input type="checkbox"/> General physician               | <input type="checkbox"/> Psychotherapy                    |
| <input type="checkbox"/> Hospital: palliative care | <input type="checkbox"/> Neurologist                     | <input type="checkbox"/> Outpatient care                  |
| <input type="checkbox"/> Hospital: other ward      | <input type="checkbox"/> Internal physician              | <input type="checkbox"/> Palliative care / consultation   |
| <input type="checkbox"/> Rehabilitation clinic     | <input type="checkbox"/> Urologist                       | <input type="checkbox"/> MS nurse                         |
| <input type="checkbox"/> Hospice                   | <input type="checkbox"/> Palliative care physician       | <input type="checkbox"/> Voluntary service / hospice care |
| <input type="checkbox"/> Psychiatry                | <input type="checkbox"/> Psychiatrist                    | <input type="checkbox"/> Outpatient rehabilitation        |
| <input type="checkbox"/> Other:                    | <input type="checkbox"/> Other specialist                | <input type="checkbox"/> Physiotherapy                    |
|                                                    | <input type="checkbox"/> Specialist palliative home care | <input type="checkbox"/> Speech therapy                   |
|                                                    | <input type="checkbox"/> MS special outpatient clinic    | <input type="checkbox"/> Occupational therapy             |
|                                                    | <input type="checkbox"/> Other:                          |                                                           |







**UNIKLINIK  
KÖLN**

## Care & Case Management Manual – COCOS-MS

Communication, Coordination und Security for people with Multiple Sclerosis

### 1.2.3 Assessment

**Date:** |\_\_| |\_\_| |\_\_| |\_\_| |\_\_| |\_\_| **Duration:** \_\_\_\_\_

#### 1.2.3.1 Patient

Please enter here the assessment from the patient's perspective. His or her goals are to be written down with codes. The comments column can be used for details. The codes used can be found in the legend.

The assessment should be made according to the following criteria. If assessment is not possible, code "99" = unknown needs to be entered.

#### Severity of the problem

- 0 = none: Patient experiences the situation as unproblematic and not stressful.
- 1 = moderate: The situation causes limitations that are sometimes experienced as problematic and slightly stressful by the patient.
- 2 = significant: The situation causes limitations that are often experienced as problematic and clearly stressful by the patient.
- 3 = high: The situation causes limitations that are predominantly experienced as problematic and highly stressful by the patient.
- 4 = very high: The situation causes limitations that are consistently experienced as problematic and extremely stressful by the patient.

#### Resources

- 0 = none: Patient does not identify own abilities, strengths or capabilities within themselves and/or their environment that could contribute to problem-solving.
- 1 = marginal: Patient identifies individual abilities, strengths or capabilities within themselves and/or their environment which may still need to be developed and could contribute to problem-solving.
- 2 = sufficient: Patient identifies general abilities, strengths or capabilities within themselves and/or their environment which can contribute to problem-solving and can probably be accessed.
- 3 = good: Patient recognizes many abilities, strengths or capabilities within themselves and/or their environment which can contribute to problem-solving and which - if not already been done - are highly likely to be accessed.
- 4 = very good: Patient recognizes a great number of abilities, strengths or capabilities within themselves and/or their environment which can make a specific contribution to problem-solving and can be used quickly.



## Care & Case Management Manual – COCOS-MS

Communication, Coordination und Security for people with Multiple Sclerosis

*Need: The Case Manager will assess the needs for an intervention which results from comparing and weighing the problem and resources, without determining them mathematically. This assessment can also be made throughout the follow-up assessment.*

- 0 = No need: There is no need for an intervention as no problem has been identified or the problem can be solved by means of existing resources.*
- 1 = Need for monitoring: There is a problem that can widely be overcome with existing resources. It should regularly be checked for changes as external support may be useful or necessary at times.*
- 2 = Need for action: There is a problem that requires additional resources to be (re)developed in order to deal with it. External intervention is necessary.*
- 3 = Need for intervention: There is a problem which basically requires resources to deal with it. External intervention is necessary, otherwise there is a high risk for the situation to worsen.*
- 4 = Crisis intervention: Immediate intervention is required to prevent or respond to an escalation of the situation. The assessment must be discontinued and can only be continued once the situation has stabilized.*



## Care & Case Management Manual – COCOS-MS

Communication, Coordination und Security for people with Multiple Sclerosis

### Section health

<sup>1</sup>Enter a value from 0 to 4 to indicate the *severity of the problem*, where 0 = ‚none‘, 1 = ‚moderate‘, 2 = ‚significant‘, 3 = ‚high‘ and 4 = ‚very high‘; 99 = ‚unknown‘.

<sup>2</sup>Enter a value from 0 to 4 to indicate the *manifestation of the resource*, where 0 = ‚none‘, 1 = ‚marginal‘, 2 = ‚sufficient‘, 3 = ‚good‘ and 4 = ‚very good‘; 99 = ‚unknown‘.

<sup>3</sup>Enter a value from 0 to 4 to indicate the *need*, where 0 = ‚no need‘, 1 = ‚need for monitoring‘, 2 = ‚need for action‘, 3 = ‚need for intervention‘ and 4 = ‚Crisis intervention‘; 99 = ‚unknown‘.

| Physical health patient (brief) |                      |                       |                   |      |         |
|---------------------------------|----------------------|-----------------------|-------------------|------|---------|
| Content                         | Problem <sup>1</sup> | Resource <sup>2</sup> | Need <sup>3</sup> | Goal | Comment |
| BKK 01 of MS (physical)         |                      |                       |                   |      |         |
| BKK 02 Other physical diseases  |                      |                       |                   |      |         |
| BKK 03 Medication               |                      |                       |                   |      |         |

| Physical health patient (long)                                |                      |                       |                   |      |         |
|---------------------------------------------------------------|----------------------|-----------------------|-------------------|------|---------|
| Content                                                       | Problem <sup>1</sup> | Resource <sup>2</sup> | Need <sup>3</sup> | Goal | Comment |
| BGK 01 Spasticity, paralysis, numbness, misperceptions (etc.) |                      |                       |                   |      |         |
| BGK 02 Pain                                                   |                      |                       |                   |      |         |
| BGK 03 Coordination, fine motor skills                        |                      |                       |                   |      |         |
| BGK 04 Swallowing, speech and language disorders              |                      |                       |                   |      |         |





**UNIKLINIK  
KÖLN**

## Care & Case Management Manual – COCOS-MS

Communication, Coordination und Security for people with Multiple Sclerosis

| Physical health patient (long)                                                                       |                      |                       |                   |      |         |
|------------------------------------------------------------------------------------------------------|----------------------|-----------------------|-------------------|------|---------|
| Content                                                                                              | Problem <sup>1</sup> | Resource <sup>2</sup> | Need <sup>3</sup> | Goal | Comment |
| <b>BGK 05</b> Vision (including double vision etc.)...                                               |                      |                       |                   |      |         |
| <b>BGK 06</b> Hearing, smell, taste                                                                  |                      |                       |                   |      |         |
| <b>BGK 07</b> Disease progression (MS)                                                               |                      |                       |                   |      |         |
| <b>BGK 08</b> Difficulty breathing                                                                   |                      |                       |                   |      |         |
| <b>BGK 09</b> Skin (including wounds)                                                                |                      |                       |                   |      |         |
| <b>BGK 10</b> Urogenital tract (urinary retention, incontinence, menstruation, erectile dysfunction) |                      |                       |                   |      |         |
| <b>BGK 11</b> Gastrointestinal tract (nausea, vomiting, constipation, fecal incontinence)            |                      |                       |                   |      |         |
| <b>BGK 12</b> Other internal diseases (cardiovascular, diabetes, hypertension, lipometabolism)       |                      |                       |                   |      |         |
| <b>BGK 13</b> Weight                                                                                 |                      |                       |                   |      |         |
| <b>BGK 14</b> Access to routine health screenings                                                    |                      |                       |                   |      |         |
| <b>BGK 15</b> Dealing with immunotherapeutic agents                                                  |                      |                       |                   |      |         |
| <b>BGK 16</b> Dealing with other medication                                                          |                      |                       |                   |      |         |



**UNIKLINIK  
KÖLN**

## Care & Case Management Manual – COCOS-MS

Communication, Coordination und Security for people with Multiple Sclerosis

| Mental health patient (brief) |                      |                       |                   |      |         |
|-------------------------------|----------------------|-----------------------|-------------------|------|---------|
| Content                       | Problem <sup>1</sup> | Resource <sup>2</sup> | Need <sup>3</sup> | Goal | Comment |
| BPK 01 Mental situation       |                      |                       |                   |      |         |

| Mental health patient (long)                    |                      |                       |                   |      |         |
|-------------------------------------------------|----------------------|-----------------------|-------------------|------|---------|
| Content                                         | Problem <sup>1</sup> | Resource <sup>2</sup> | Need <sup>3</sup> | Goal | Comment |
| BGP 01 Dealing with stress/stressful situations |                      |                       |                   |      |         |
| BGP 02 Concentration                            |                      |                       |                   |      |         |
| BGP 03 Cognition                                |                      |                       |                   |      |         |
| BGP 04 Disorientation                           |                      |                       |                   |      |         |
| BGP 05 Personality changes                      |                      |                       |                   |      |         |
| BGP 06 Fatigue                                  |                      |                       |                   |      |         |
| BGP 07 Depression                               |                      |                       |                   |      |         |
| BGP 08 Depressive mood                          |                      |                       |                   |      |         |
| BGP 09 Suicidal thoughts                        |                      |                       |                   |      |         |
| BGP 10 Anxiety/inner restlessness               |                      |                       |                   |      |         |
| BGP 11 Anxiety/panic attacks                    |                      |                       |                   |      |         |

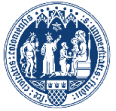

**UNIKLINIK  
KÖLN**

## Care & Case Management Manual – COCOS-MS

Communication, Coordination und Security for people with Multiple Sclerosis

| Mental health patient (long)                 |                      |                       |                   |      |         |
|----------------------------------------------|----------------------|-----------------------|-------------------|------|---------|
| Content                                      | Problem <sup>1</sup> | Resource <sup>2</sup> | Need <sup>3</sup> | Goal | Comment |
| <b>BGP 12</b> Grief                          |                      |                       |                   |      |         |
| <b>BGP 13</b> Being able to express emotions |                      |                       |                   |      |         |
| <b>BGP 14</b> Biographical disruption        |                      |                       |                   |      |         |
| <b>BGP 15</b> Autonomy                       |                      |                       |                   |      |         |
| <b>BGP 16</b> Smoking                        |                      |                       |                   |      |         |
| <b>BGP 17</b> Alcohol and drug consumption   |                      |                       |                   |      |         |

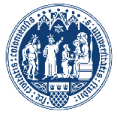

**UNIKLINIK  
KÖLN**

## Care & Case Management Manual – COCOS-MS

Communication, Coordination und Security for people with Multiple Sclerosis

### Section autarky

<sup>1</sup>Enter a value from 0 to 4 to indicate the *severity of the problem*, where 0 = ‚none‘, 1 = ‚moderate‘, 2 = ‚significant‘, 3 = ‚high‘ and 4 = ‚very high‘; 99 = ‚unknown‘.

<sup>2</sup>Enter a value from 0 to 4 to indicate the *manifestation of the resource*, where 0 = ‚none‘, 1 = ‚marginal‘, 2 = ‚sufficient‘, 3 = ‚good‘ and 4 = ‚very good‘; 99 = ‚unknown‘.

<sup>3</sup>Enter a value from 0 to 4 to indicate the *need*, where 0 = ‚no need‘, 1 = ‚need for monitoring‘, 2 = ‚need for action‘, 3 = ‚need for intervention‘ and 4 = ‚Crisis intervention‘; 99 = ‚unknown‘.

| Autarky patient (brief)                                   |                      |                       |                   |      |         |
|-----------------------------------------------------------|----------------------|-----------------------|-------------------|------|---------|
| Content                                                   | Problem <sup>1</sup> | Resource <sup>2</sup> | Need <sup>3</sup> | Goal | Comment |
| <b>BAP 01</b> Self-sufficiency care                       |                      |                       |                   |      |         |
| <b>BAP 02</b> Self-sufficiency household and organization |                      |                       |                   |      |         |
| <b>BAP 03</b> Medical, nursing, therapeutic care          |                      |                       |                   |      |         |
| <b>BAP 04</b> Mobility                                    |                      |                       |                   |      |         |
| <b>BAP 05</b> Living                                      |                      |                       |                   |      |         |
| <b>BAP 06</b> Work and employment (e.g. voluntary work)   |                      |                       |                   |      |         |
| <b>BAP 07</b> Financial and social situation              |                      |                       |                   |      |         |



**UNIKLINIK  
KÖLN**

## Care & Case Management Manual – COCOS-MS

Communication, Coordination und Security for people with Multiple Sclerosis

| Self-sufficiency patient                  |                      |                       |                   |      |         |
|-------------------------------------------|----------------------|-----------------------|-------------------|------|---------|
| Content                                   | Problem <sup>1</sup> | Resource <sup>2</sup> | Need <sup>3</sup> | Goal | Comment |
| BSV 01 Satisfaction with outer appearance |                      |                       |                   |      |         |
| BSV 02 Washing upper body                 |                      |                       |                   |      |         |
| BSV 03 Washing lower body                 |                      |                       |                   |      |         |
| BSV 04 Incontinence care                  |                      |                       |                   |      |         |
| BSV 05 Showering/taking a bath            |                      |                       |                   |      |         |
| BSV 06 Dental care                        |                      |                       |                   |      |         |
| BSV 07 Hair/nail care                     |                      |                       |                   |      |         |
| BSV 08 Putting on clothes incl. shoes     |                      |                       |                   |      |         |
| BSV 09 Cleaning the apartment             |                      |                       |                   |      |         |
| BSV 10 Eating independently               |                      |                       |                   |      |         |
| BSV 11 Drinking independently             |                      |                       |                   |      |         |
| BSV 12 Preparing food                     |                      |                       |                   |      |         |
| BSV 13 Shopping                           |                      |                       |                   |      |         |
| BSV 14 Preparing medication               |                      |                       |                   |      |         |



**UNIKLINIK  
KÖLN**

## Care & Case Management Manual – COCOS-MS

Communication, Coordination und Security for people with Multiple Sclerosis

| Self-sufficiency patient                          |                      |                       |                   |      |         |
|---------------------------------------------------|----------------------|-----------------------|-------------------|------|---------|
| Content                                           | Problem <sup>1</sup> | Resource <sup>2</sup> | Need <sup>3</sup> | Goal | Comment |
| <b>BSV 15</b> Procurement of medication           |                      |                       |                   |      |         |
| <b>BSV 16</b> Own organization of daily structure |                      |                       |                   |      |         |
| <b>BSV 17</b> Coordinating appointments           |                      |                       |                   |      |         |

| Medical, nursing und therapeutic care patient |                      |                       |                   |      |         |
|-----------------------------------------------|----------------------|-----------------------|-------------------|------|---------|
| Content                                       | Problem <sup>1</sup> | Resource <sup>2</sup> | Need <sup>3</sup> | Goal | Comment |
| <b>BMP 01</b> General medical care            |                      |                       |                   |      |         |
| <b>BMP 02</b> Neurological care               |                      |                       |                   |      |         |
| <b>BMP 03</b> Other specialist care           |                      |                       |                   |      |         |
| <b>BMP 04</b> Nursing care                    |                      |                       |                   |      |         |
| <b>BMP 05</b> Physiotherapy                   |                      |                       |                   |      |         |
| <b>BMP 06</b> Occupational therapy            |                      |                       |                   |      |         |
| <b>BMP 07</b> Speech therapy                  |                      |                       |                   |      |         |
| <b>BMP 08</b> Psychotherapy                   |                      |                       |                   |      |         |



**UNIKLINIK  
KÖLN**

## Care & Case Management Manual – COCOS-MS

Communication, Coordination und Security for people with Multiple Sclerosis

| Medical, nursing und therapeutic care patient                               |                      |                       |                   |      |         |
|-----------------------------------------------------------------------------|----------------------|-----------------------|-------------------|------|---------|
| Content                                                                     | Problem <sup>1</sup> | Resource <sup>2</sup> | Need <sup>3</sup> | Goal | Comment |
| <b>BMP 09</b> Information about MS (Follow-up, therapy, self-help services) |                      |                       |                   |      |         |

| Mobility patient                                                                          |                      |                       |                   |      |         |
|-------------------------------------------------------------------------------------------|----------------------|-----------------------|-------------------|------|---------|
| Content                                                                                   | Problem <sup>1</sup> | Resource <sup>2</sup> | Need <sup>3</sup> | Goal | Comment |
| <b>BMO 01</b> Walking within the apartment                                                |                      |                       |                   |      |         |
| <b>BMO 02</b> Walking outside the apartment                                               |                      |                       |                   |      |         |
| <b>BMO 03</b> Going up stairs                                                             |                      |                       |                   |      |         |
| <b>BMO 04</b> Standing securely                                                           |                      |                       |                   |      |         |
| <b>BMO 05</b> Access to individual means of transport (car, bicycle, scooter, motorcycle) |                      |                       |                   |      |         |
| <b>BMO 06</b> Use of individual means of transport                                        |                      |                       |                   |      |         |
| <b>BMO 07</b> Access to public transport                                                  |                      |                       |                   |      |         |
| <b>BMO 08</b> Use of public transport                                                     |                      |                       |                   |      |         |



**UNIKLINIK  
KÖLN**

## Care & Case Management Manual – COCOS-MS

Communication, Coordination und Security for people with Multiple Sclerosis

| Living patient                                             |                      |                       |                   |      |         |
|------------------------------------------------------------|----------------------|-----------------------|-------------------|------|---------|
| Content                                                    | Problem <sup>1</sup> | Resource <sup>2</sup> | Need <sup>3</sup> | Goal | Comment |
| <b>BWO 01</b> Place of residence                           |                      |                       |                   |      |         |
| <b>BWO 02</b> Type of apartment / house / apartment / room |                      |                       |                   |      |         |
| <b>BWO 03</b> Access to apartment / house etc.             |                      |                       |                   |      |         |
| <b>BWO 04</b> Accessibility living and sleeping rooms      |                      |                       |                   |      |         |
| <b>BWO 05</b> Accessibility bathroom                       |                      |                       |                   |      |         |
| <b>BWO 06</b> Accessibility kitchen and other premises     |                      |                       |                   |      |         |
| <b>BWO 07</b> Accessibility balcony / terrace / garden     |                      |                       |                   |      |         |

| Work and employment patient         |                      |                       |                   |      |         |
|-------------------------------------|----------------------|-----------------------|-------------------|------|---------|
| Content                             | Problem <sup>1</sup> | Resource <sup>2</sup> | Need <sup>3</sup> | Goal | Comment |
| <b>BAB 01</b> Employability         |                      |                       |                   |      |         |
| <b>BAB 02</b> Work ability          |                      |                       |                   |      |         |
| <b>BAB 03</b> Working hours         |                      |                       |                   |      |         |
| <b>BAB 04</b> Workplace arrangement |                      |                       |                   |      |         |





**UNIKLINIK  
KÖLN**

## Care & Case Management Manual – COCOS-MS

Communication, Coordination und Security for people with Multiple Sclerosis

| Work and employment patient                        |                      |                       |                   |      |         |
|----------------------------------------------------|----------------------|-----------------------|-------------------|------|---------|
| Content                                            | Problem <sup>1</sup> | Resource <sup>2</sup> | Need <sup>3</sup> | Goal | Comment |
| BAB 05 Meaningful activities (e.g. volunteer work) |                      |                       |                   |      |         |

| Financial and social law situation patient                |                      |                       |                   |      |         |
|-----------------------------------------------------------|----------------------|-----------------------|-------------------|------|---------|
| Content                                                   | Problem <sup>1</sup> | Resource <sup>2</sup> | Need <sup>3</sup> | Goal | Comment |
| BFS 01 Financial security of subsistence                  |                      |                       |                   |      |         |
| BFS 02 Financial security of care                         |                      |                       |                   |      |         |
| BFS 03 Financing of housing adaptation                    |                      |                       |                   |      |         |
| BFS 04 Financing of medical aids                          |                      |                       |                   |      |         |
| BFS 05 Social insurance agency (e.g. health insurance)    |                      |                       |                   |      |         |
| BFS 06 Debts                                              |                      |                       |                   |      |         |
| BFS 07 Old-age provision                                  |                      |                       |                   |      |         |
| BFS 08 Being able to represent legal interests themselves |                      |                       |                   |      |         |
| BFS 09 Recognition of (severe) disability                 |                      |                       |                   |      |         |
| BFS 10 Other social law needs (e.g. custody)              |                      |                       |                   |      |         |

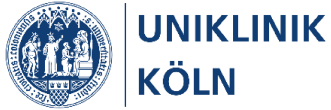

## Care & Case Management Manual – COCOS-MS

Communication, Coordination und Security for people with Multiple Sclerosis

### Section social situation and participation

<sup>1</sup>Enter a value from 0 to 4 to indicate the *severity of the problem*, where 0 = ,none', 1 = ,moderate', 2 = ,significant', 3 = ,high' and 4 = ,very high'; 99 = ,unknown'.

<sup>2</sup>Enter a value from 0 to 4 to indicate the *manifestation of the resource*, where 0 = ,none', 1 = ,marginal', 2 = ,sufficient', 3 = ,good' and 4 = ,very good'; 99 = ,unknown'.

<sup>3</sup>Enter a value from 0 to 4 to indicate the *need*, where 0 = ,no need', 1 = ,need for monitoring', 2 = ,need for action', 3 = ,need for intervention' and 4 = ,Crisis intervention'; 99 = ,unknown'.

| Social situation und participation patient (brief) |                      |                       |                   |      |         |
|----------------------------------------------------|----------------------|-----------------------|-------------------|------|---------|
| Content                                            | Problem <sup>1</sup> | Resource <sup>2</sup> | Need <sup>3</sup> | Goal | Comment |
| BSP 01 Involvement of family and friends           |                      |                       |                   |      |         |
| BSP 02 Role as e.g. partner, child, parent, friend |                      |                       |                   |      |         |
| BSP 03 Pursuing hobbies/interests                  |                      |                       |                   |      |         |
| BSP 04 Cultural/social/political participation     |                      |                       |                   |      |         |
| BSP 05 Spiritual/pastoral support                  |                      |                       |                   |      |         |

| Communication patient                    |                      |                       |                   |      |         |
|------------------------------------------|----------------------|-----------------------|-------------------|------|---------|
| Content                                  | Problem <sup>1</sup> | Resource <sup>2</sup> | Need <sup>3</sup> | Goal | Comment |
| BKO 01 Use of computer/tablet/smartphone |                      |                       |                   |      |         |
| BKO 02 Use of mobile/telephone           |                      |                       |                   |      |         |



**UNIKLINIK  
KÖLN**

## Care & Case Management Manual – COCOS-MS

Communication, Coordination und Security for people with Multiple Sclerosis

| Communication patient                                                        |                      |                       |                   |      |         |
|------------------------------------------------------------------------------|----------------------|-----------------------|-------------------|------|---------|
| Content                                                                      | Problem <sup>1</sup> | Resource <sup>2</sup> | Need <sup>3</sup> | Goal | Comment |
| <b>BKO 03</b> Access to information media (internet, television, newspapers) |                      |                       |                   |      |         |
| <b>BKO 04</b> Writing, reading, listening                                    |                      |                       |                   |      |         |

| Social inclusion patient                                  |                      |                       |                   |      |         |
|-----------------------------------------------------------|----------------------|-----------------------|-------------------|------|---------|
| Content                                                   | Problem <sup>1</sup> | Resource <sup>2</sup> | Need <sup>3</sup> | Goal | Comment |
| <b>BSE 01</b> Feeling like they belong                    |                      |                       |                   |      |         |
| <b>BSE 02</b> Concern for family/relatives                |                      |                       |                   |      |         |
| <b>BSE 03</b> Maintaining friendships                     |                      |                       |                   |      |         |
| <b>BSE 04</b> Participation in events with family/friends |                      |                       |                   |      |         |
| <b>BSE 05</b> Being a parent, son, daughter, friend       |                      |                       |                   |      |         |
| <b>BSE 06</b> Being a partner                             |                      |                       |                   |      |         |
| <b>BSE 07</b> Love and sex life                           |                      |                       |                   |      |         |
| <b>BSE 08</b> Family planning, access to contraceptives   |                      |                       |                   |      |         |



**UNIKLINIK  
KÖLN**

## Care & Case Management Manual – COCOS-MS

Communication, Coordination und Security for people with Multiple Sclerosis

| Social and political participation patient                                            |                      |                       |                   |      |         |
|---------------------------------------------------------------------------------------|----------------------|-----------------------|-------------------|------|---------|
| Content                                                                               | Problem <sup>1</sup> | Resource <sup>2</sup> | Need <sup>3</sup> | Goal | Comment |
| <b>BGP 01</b> Participation in neighborhood/club life                                 |                      |                       |                   |      |         |
| <b>BGP 02</b> Access to educational opportunities (e.g. adult education center “VHS”) |                      |                       |                   |      |         |
| <b>BGP 03</b> Political participation (right to vote, demonstrations)                 |                      |                       |                   |      |         |

| Recreational activities patient                                  |                      |                       |                   |      |         |
|------------------------------------------------------------------|----------------------|-----------------------|-------------------|------|---------|
| Content                                                          | Problem <sup>1</sup> | Resource <sup>2</sup> | Need <sup>3</sup> | Goal | Comment |
| <b>BFG 01</b> Sufficient leisure time                            |                      |                       |                   |      |         |
| <b>BFG 02</b> Pursuing hobbies/interests                         |                      |                       |                   |      |         |
| <b>BFG 03</b> Doing sports                                       |                      |                       |                   |      |         |
| <b>BFG 04</b> Use of cultural events (cinema, theatre, concerts) |                      |                       |                   |      |         |
| <b>BFG 05</b> Going on vacation                                  |                      |                       |                   |      |         |

| Religion and spirituality patient                          |                      |                       |                   |      |         |
|------------------------------------------------------------|----------------------|-----------------------|-------------------|------|---------|
| Content                                                    | Problem <sup>1</sup> | Resource <sup>2</sup> | Need <sup>3</sup> | Goal | Comment |
| <b>BRS 01</b> Opportunity to express religion/spirituality |                      |                       |                   |      |         |



**UNIKLINIK  
KÖLN**

## Care & Case Management Manual – COCOS-MS

Communication, Coordination und Security for people with Multiple Sclerosis

| Religion and spirituality patient              |                      |                       |                   |      |         |
|------------------------------------------------|----------------------|-----------------------|-------------------|------|---------|
| Content                                        | Problem <sup>1</sup> | Resource <sup>2</sup> | Need <sup>3</sup> | Goal | Comment |
| BRS 02 Contact with spiritual/pastoral support |                      |                       |                   |      |         |
| BRS 03 Finding own spirituality/religion       |                      |                       |                   |      |         |

Comments:



UNIKLINIK  
KÖLN

## Care & Case Management Manual – COCOS-MS

Communication, Coordination und Security for people with Multiple Sclerosis

### 1.2.3.2 Caregiver

Date: |\_\_|\_|\_\_|\_|\_|\_|\_|\_| Duration: \_\_\_\_\_

Please enter here the assessment from the caregiver's perspective. His or her goals are to be written down with codes. The comments column can be used for details. The codes used can be found in the legend.

The assessment should be made according to the following criteria. If assessment is not possible, code "99" = unknown needs to be entered.

#### Severity of the problem

- 0 = none: Caregiver experiences the situation as unproblematic and not stressful.
- 1 = moderate: The situation causes limitations that are sometimes experienced as problematic and slightly stressful by the caregiver.
- 2 = significant: The situation causes limitations that are often experienced as problematic and clearly stressful by the caregiver.
- 3 = high: The situation causes limitations that are predominantly experienced as problematic and highly stressful by the caregiver.
- 4 = very high: The situation causes limitations that are consistently experienced as problematic and extremely stressful by the caregiver.

#### Resources

- 0 = none: Caregiver does not identify own abilities, strengths or capabilities within themselves and/or their environment that could contribute to problem-solving.
- 1 = marginal: Caregiver identifies individual abilities, strengths or capabilities within themselves and/or their environment which may still need to be developed and could contribute to problem-solving.
- 2 = sufficient: Caregiver identifies general abilities, strengths or capabilities within themselves and/or their environment which can contribute to problem-solving and can probably be accessed.
- 3 = good: Caregiver recognizes many abilities, strengths or capabilities within themselves and/or their environment which can contribute to problem-solving and which - if not already been done - are highly likely to be accessed.



UNIKLINIK  
KÖLN

## Care & Case Management Manual – COCOS-MS

Communication, Coordination und Security for people with Multiple Sclerosis

*4 = very good: Caregiver recognizes a great number of abilities, strengths or capabilities within themselves and/or their environment which can make a specific contribution to problem-solving and can be used quickly.*

*Need: The Case Manager will assess the needs for an intervention which results from comparing and weighing the problem and resources, without determining them mathematically. This assessment can also be made throughout the follow-up assessment.*

*0 = No need: There is no need for an intervention as no problem has been identified or the problem can be solved by means of existing resources.*

*1 = Need for monitoring: There is a problem that can widely be overcome with existing resources. It should regularly be checked for changes as external support may be useful or necessary at times.*

*2 = Need for action: There is a problem that requires additional resources to be (re)developed in order to deal with it. External intervention is necessary.*

*3 = Need for intervention: There is a problem which basically requires resources to deal with it. External intervention is necessary, otherwise there is a high risk for the situation to worsen.*

*4 = Crisis intervention: Immediate intervention is required to prevent or respond to an escalation of the situation. The assessment must be discontinued and can only be continued once the situation has stabilized.*



**UNIKLINIK  
KÖLN**

## Care & Case Management Manual – COCOS-MS

Communication, Coordination und Security for people with Multiple Sclerosis

<sup>1</sup>Enter a value from 0 to 4 to indicate the *severity of the problem*, where 0 = ,none', 1 = ,moderate', 2 = ,significant', 3 = ,high' and 4 = ,very high'; 99 = ,unknown'.

<sup>2</sup>Enter a value from 0 to 4 to indicate the *manifestation of the resource*, where 0 = ,none', 1 = ,marginal', 2 = ,sufficient', 3 = ,good' and 4 = ,very good'; 99 = ,unknown'.

<sup>3</sup>Enter a value from 0 to 4 to indicate the *need*, where 0 = ,no need', 1 = ,need for monitoring', 2 = ,need for action', 3 = ,need for intervention' and 4 = ,Crisis intervention'; 99 = ,unknown'.

| Physical health caregiver          |                      |                       |                   |      |         |
|------------------------------------|----------------------|-----------------------|-------------------|------|---------|
| Content                            | Problem <sup>1</sup> | Resource <sup>2</sup> | Need <sup>3</sup> | Goal | Comment |
| BKB 01 Physical diseases           |                      |                       |                   |      |         |
| BKB 02 Physical burden due to care |                      |                       |                   |      |         |

| Mental health caregiver              |                      |                       |                   |      |         |
|--------------------------------------|----------------------|-----------------------|-------------------|------|---------|
| Content                              | Problem <sup>1</sup> | Resource <sup>2</sup> | Need <sup>3</sup> | Goal | Comment |
| BPB 01 Emotional burden as caregiver |                      |                       |                   |      |         |
| BPB 02 Mental diseases               |                      |                       |                   |      |         |

| Autarky caregiver                              |                      |                       |                   |      |         |
|------------------------------------------------|----------------------|-----------------------|-------------------|------|---------|
| Content                                        | Problem <sup>1</sup> | Resource <sup>2</sup> | Need <sup>3</sup> | Goal | Comment |
| BBS 01 Housekeeping (shopping, cleaning, etc.) |                      |                       |                   |      |         |
| BBS 02 Organization (e.g. appointments)        |                      |                       |                   |      |         |
| BBS 03 Mobility                                |                      |                       |                   |      |         |





## Care & Case Management Manual – COCOS-MS

Communication, Coordination und Security for people with Multiple Sclerosis

| Autarky caregiver           |                      |                       |                   |      |         |
|-----------------------------|----------------------|-----------------------|-------------------|------|---------|
| Content                     | Problem <sup>1</sup> | Resource <sup>2</sup> | Need <sup>3</sup> | Goal | Comment |
| BBS 04 Living               |                      |                       |                   |      |         |
| BBS 05 Work                 |                      |                       |                   |      |         |
| BBS 06 Financial protection |                      |                       |                   |      |         |

| Social involvement and participation caregiver     |                      |                       |                   |      |         |
|----------------------------------------------------|----------------------|-----------------------|-------------------|------|---------|
| Content                                            | Problem <sup>1</sup> | Resource <sup>2</sup> | Need <sup>3</sup> | Goal | Comment |
| BBE 01 Family involvement                          |                      |                       |                   |      |         |
| BBE 02 Maintaining friendships                     |                      |                       |                   |      |         |
| BBE 03 Role as e.g. partner, child, parent, friend |                      |                       |                   |      |         |
| BBE 04 Pursuing hobbies/interests                  |                      |                       |                   |      |         |
| BBE 05 Cultural/social/political participation     |                      |                       |                   |      |         |
| BBE 06 Spiritual/pastoral support                  |                      |                       |                   |      |         |

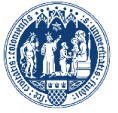

UNIKLINIK  
KÖLN

## Care & Case Management Manual – COCOS-MS

Communication, Coordination und Security for people with Multiple Sclerosis

Comments:



**UNIKLINIK  
KÖLN**

## Care & Case Management Manual – COCOS-MS

Communication, Coordination und Security for people with Multiple Sclerosis

### 1.3. Action plan/care plan/cooperation plan

#### 1.3.1 Action plan

**Date:** |\_\_| |\_\_| |\_\_| |\_\_| |\_\_| |\_\_| **Duration:** \_\_\_\_\_

Using the manual codes (see legend), please enter here which action you would like to suggest to achieve the patient's goals and keep track of whether the suggestion was agreed upon or rejected. If there is not enough space in the table, you can additionally use the supplementary sheet 'action plan' (see appendix).

<sup>1</sup>please specify the proposed action here.

| Goal | Suggestive action |                          | Patient decision |                          |                          |                          | Comment |
|------|-------------------|--------------------------|------------------|--------------------------|--------------------------|--------------------------|---------|
|      | Code              | Translation <sup>1</sup> | Date             | Agreement                | Undecided                | Rejection                |         |
|      |                   |                          |                  | <input type="checkbox"/> | <input type="checkbox"/> | <input type="checkbox"/> |         |
|      |                   |                          |                  | <input type="checkbox"/> | <input type="checkbox"/> | <input type="checkbox"/> |         |
|      |                   |                          |                  | <input type="checkbox"/> | <input type="checkbox"/> | <input type="checkbox"/> |         |
|      |                   |                          |                  | <input type="checkbox"/> | <input type="checkbox"/> | <input type="checkbox"/> |         |
|      |                   |                          |                  | <input type="checkbox"/> | <input type="checkbox"/> | <input type="checkbox"/> |         |
|      |                   |                          |                  | <input type="checkbox"/> | <input type="checkbox"/> | <input type="checkbox"/> |         |
|      |                   |                          |                  | <input type="checkbox"/> | <input type="checkbox"/> | <input type="checkbox"/> |         |
|      |                   |                          |                  | <input type="checkbox"/> | <input type="checkbox"/> | <input type="checkbox"/> |         |
|      |                   |                          |                  | <input type="checkbox"/> | <input type="checkbox"/> | <input type="checkbox"/> |         |
|      |                   |                          |                  | <input type="checkbox"/> | <input type="checkbox"/> | <input type="checkbox"/> |         |
|      |                   |                          |                  | <input type="checkbox"/> | <input type="checkbox"/> | <input type="checkbox"/> |         |
|      |                   |                          |                  | <input type="checkbox"/> | <input type="checkbox"/> | <input type="checkbox"/> |         |



**UNIKLINIK  
KÖLN**

## Care & Case Management Manual – COCOS-MS

Communication, Coordination und Security for people with Multiple Sclerosis

| Goal | Suggestive action |                          | Patient decision |                          |                          |                          | Comment |
|------|-------------------|--------------------------|------------------|--------------------------|--------------------------|--------------------------|---------|
|      | Code              | Translation <sup>1</sup> | Date             | Agreement                | Undecided                | Rejection                |         |
|      |                   |                          |                  | <input type="checkbox"/> | <input type="checkbox"/> | <input type="checkbox"/> |         |
|      |                   |                          |                  | <input type="checkbox"/> | <input type="checkbox"/> | <input type="checkbox"/> |         |
|      |                   |                          |                  | <input type="checkbox"/> | <input type="checkbox"/> | <input type="checkbox"/> |         |
|      |                   |                          |                  | <input type="checkbox"/> | <input type="checkbox"/> | <input type="checkbox"/> |         |
|      |                   |                          |                  | <input type="checkbox"/> | <input type="checkbox"/> | <input type="checkbox"/> |         |
|      |                   |                          |                  | <input type="checkbox"/> | <input type="checkbox"/> | <input type="checkbox"/> |         |
|      |                   |                          |                  | <input type="checkbox"/> | <input type="checkbox"/> | <input type="checkbox"/> |         |
|      |                   |                          |                  | <input type="checkbox"/> | <input type="checkbox"/> | <input type="checkbox"/> |         |
|      |                   |                          |                  | <input type="checkbox"/> | <input type="checkbox"/> | <input type="checkbox"/> |         |
|      |                   |                          |                  | <input type="checkbox"/> | <input type="checkbox"/> | <input type="checkbox"/> |         |
|      |                   |                          |                  | <input type="checkbox"/> | <input type="checkbox"/> | <input type="checkbox"/> |         |
|      |                   |                          |                  | <input type="checkbox"/> | <input type="checkbox"/> | <input type="checkbox"/> |         |
|      |                   |                          |                  | <input type="checkbox"/> | <input type="checkbox"/> | <input type="checkbox"/> |         |
|      |                   |                          |                  | <input type="checkbox"/> | <input type="checkbox"/> | <input type="checkbox"/> |         |
|      |                   |                          |                  | <input type="checkbox"/> | <input type="checkbox"/> | <input type="checkbox"/> |         |
|      |                   |                          |                  | <input type="checkbox"/> | <input type="checkbox"/> | <input type="checkbox"/> |         |
|      |                   |                          |                  | <input type="checkbox"/> | <input type="checkbox"/> | <input type="checkbox"/> |         |
|      |                   |                          |                  | <input type="checkbox"/> | <input type="checkbox"/> | <input type="checkbox"/> |         |



**UNIKLINIK  
KÖLN**

## Care & Case Management Manual – COCOS-MS

Communication, Coordination und Security for people with Multiple Sclerosis

### 1.3.2 Care plan

|                 |                               |                 |
|-----------------|-------------------------------|-----------------|
| <b>1. Plan:</b> | Date:  __   __   __   __   __ | Duration: _____ |
| Revised:        | Date:  __   __   __   __   __ | Duration: _____ |
| Revised:        | Date:  __   __   __   __   __ | Duration: _____ |
| Revised:        | Date:  __   __   __   __   __ | Duration: _____ |
| Revised:        | Date:  __   __   __   __   __ | Duration: _____ |
| Revised:        | Date:  __   __   __   __   __ | Duration: _____ |
| Revised:        | Date:  __   __   __   __   __ | Duration: _____ |
| Revised:        | Date:  __   __   __   __   __ | Duration: _____ |
| Revised:        | Date:  __   __   __   __   __ | Duration: _____ |
| Revised:        | Date:  __   __   __   __   __ | Duration: _____ |
| Revised:        | Date:  __   __   __   __   __ | Duration: _____ |
| Revised:        | Date:  __   __   __   __   __ | Duration: _____ |
| Revised:        | Date:  __   __   __   __   __ | Duration: _____ |
| Revised:        | Date:  __   __   __   __   __ | Duration: _____ |

*Using the manual codes (see 'KOKOS-MS CM manual legend'), please enter here which action you have planned to achieve the patient's goals and keep track of whether the goals have been achieved or not. The plan should be revised as part of the regular follow-up assessment. If there is not enough space in the table, you can additionally use the supplementary sheet 'care plan' (see appendix).*



**UNIKLINIK  
KÖLN**

## Care & Case Management Manual – COCOS-MS

Communication, Coordination und Security for people with Multiple Sclerosis

The goal achievement is to be assessed from the patient's perspective and evaluated as follows:

- |                         |                                                                                            |
|-------------------------|--------------------------------------------------------------------------------------------|
| 0 = not achieved:       | The goal has not been achieved in any way or appears just as far as when the goal was set. |
| 1 = hardly achieved:    | The goal has moved a little closer than when the goal was set.                             |
| 2 = partially achieved: | The goal has moved significantly closer than when the goal was set.                        |
| 3 = achieved:           | The current situation corresponds to the set goal.                                         |
| 4 = more than achieved: | The current situation is considered better than the set goal.                              |

<sup>1</sup>Please document the goal achievement according to the following scale: 0= not achieved, 1= hardly achieved, 2= partially achieved, 3= achieved, 4= more than achieved.

| No. | Section | Goal | Action |             |          | Cooperation partner | Goal achievement <sup>1</sup> | Comment |
|-----|---------|------|--------|-------------|----------|---------------------|-------------------------------|---------|
|     |         |      | Code   | Appointment | Location |                     |                               |         |
|     |         |      |        |             |          |                     |                               |         |
|     |         |      |        |             |          |                     |                               |         |
|     |         |      |        |             |          |                     |                               |         |
|     |         |      |        |             |          |                     |                               |         |
|     |         |      |        |             |          |                     |                               |         |
|     |         |      |        |             |          |                     |                               |         |
|     |         |      |        |             |          |                     |                               |         |
|     |         |      |        |             |          |                     |                               |         |
|     |         |      |        |             |          |                     |                               |         |



**UNIKLINIK  
KÖLN**

## Care & Case Management Manual – COCOS-MS

Communication, Coordination und Security for people with Multiple Sclerosis

| No. | Section | Goal | Action |             |          | Cooperation partner | Goal achievement <sup>1</sup> | Comment |
|-----|---------|------|--------|-------------|----------|---------------------|-------------------------------|---------|
|     |         |      | Code   | Appointment | Location |                     |                               |         |
|     |         |      |        |             |          |                     |                               |         |
|     |         |      |        |             |          |                     |                               |         |
|     |         |      |        |             |          |                     |                               |         |
|     |         |      |        |             |          |                     |                               |         |
|     |         |      |        |             |          |                     |                               |         |
|     |         |      |        |             |          |                     |                               |         |
|     |         |      |        |             |          |                     |                               |         |
|     |         |      |        |             |          |                     |                               |         |
|     |         |      |        |             |          |                     |                               |         |







**UNIKLINIK  
KÖLN**

## Care & Case Management Manual – COCOS-MS

Communication, Coordination und Security for people with Multiple Sclerosis

### 1.4 Telephone contacts und monitoring

*Documentation of the weekly telephone contacts. Please document content, topics and patient satisfaction.*

#### 1.4.1 First telephone contact und monitoring

|                                                                                                                                                                                                                                                                                                                                                                                                                    |                                                                                                                                                                                                                                                                                                                                                                                                                |
|--------------------------------------------------------------------------------------------------------------------------------------------------------------------------------------------------------------------------------------------------------------------------------------------------------------------------------------------------------------------------------------------------------------------|----------------------------------------------------------------------------------------------------------------------------------------------------------------------------------------------------------------------------------------------------------------------------------------------------------------------------------------------------------------------------------------------------------------|
| Date: _____ Duration (in minutes): _____ conducted with: <input type="checkbox"/> patient <input type="checkbox"/> caregiver <input type="checkbox"/> both                                                                                                                                                                                                                                                         |                                                                                                                                                                                                                                                                                                                                                                                                                |
| <p>Topics (following the sections of the brief assessments in key points):</p> <p><input type="checkbox"/> Section physical health<br/>_____</p> <p><input type="checkbox"/> Section mental health<br/>_____</p> <p><input type="checkbox"/> Section autarky<br/>_____</p> <p><input type="checkbox"/> Section social involvement and participation<br/>_____</p> <p><input type="checkbox"/> Other:<br/>_____</p> | <p>CCM-services:</p> <p><input type="checkbox"/> Information</p> <p><input type="checkbox"/> Training/instruction</p> <p><input type="checkbox"/> Consultation</p> <p><input type="checkbox"/> Coordination</p> <p><input type="checkbox"/> Linking</p> <p><input type="checkbox"/> Planning (appointments)</p> <p><input type="checkbox"/> Monitoring</p> <p><input type="checkbox"/> Other (text entry):</p> |
|                                                                                                                                                                                                                                                                                                                                                                                                                    |                                                                                                                                                                                                                                                                                                                                                                                                                |



**UNIKLINIK  
KÖLN**

## Care & Case Management Manual – COCOS-MS

Communication, Coordination und Security for people with Multiple Sclerosis

<sup>1</sup>Enter a value from 0 to 4 here to indicate satisfaction with the CCM actions, where 0 = 'very dissatisfied', 1 = 'dissatisfied', 2 = 'neither satisfied nor dissatisfied', 3 = 'satisfied' and 4 = 'very satisfied'; 99 = 'unknown'.

| Action | Initiated                | Continued                | Finished                 | Satisfaction <sup>1</sup> | Comment |
|--------|--------------------------|--------------------------|--------------------------|---------------------------|---------|
| 1.     | <input type="checkbox"/> | <input type="checkbox"/> | <input type="checkbox"/> |                           |         |
| 2.     | <input type="checkbox"/> | <input type="checkbox"/> | <input type="checkbox"/> |                           |         |
| 3.     | <input type="checkbox"/> | <input type="checkbox"/> | <input type="checkbox"/> |                           |         |
| 4.     | <input type="checkbox"/> | <input type="checkbox"/> | <input type="checkbox"/> |                           |         |
| 5.     | <input type="checkbox"/> | <input type="checkbox"/> | <input type="checkbox"/> |                           |         |
| 6.     | <input type="checkbox"/> | <input type="checkbox"/> | <input type="checkbox"/> |                           |         |
| 7.     | <input type="checkbox"/> | <input type="checkbox"/> | <input type="checkbox"/> |                           |         |
| 8.     | <input type="checkbox"/> | <input type="checkbox"/> | <input type="checkbox"/> |                           |         |
| 9.     | <input type="checkbox"/> | <input type="checkbox"/> | <input type="checkbox"/> |                           |         |
| 10.    | <input type="checkbox"/> | <input type="checkbox"/> | <input type="checkbox"/> |                           |         |



UNIKLINIK  
KÖLN

## Care & Case Management Manual – COCOS-MS

Communication, Coordination und Security for people with Multiple Sclerosis

### 1.4.2 Second telephone contact und monitoring

*Please insert here "Telephone contact and monitoring" (see 1.4.1) from the appendix.*



UNIKLINIK  
KÖLN

## Care & Case Management Manual – COCOS-MS

Communication, Coordination und Security for people with Multiple Sclerosis

### 1.4.3 Third telephone contact und monitoring

*Please insert here "Telephone contact and monitoring" (see 1.4.1) from the appendix.*



UNIKLINIK  
KÖLN

## Care & Case Management Manual – COCOS-MS

Communication, Coordination und Security for people with Multiple Sclerosis

### 2. Month 2: Brief assessment/process control (monitoring, update care plan)/telephone contacts

#### 2.1 Brief assessment

*In the brief assessment, a new assessment and clarification of needs is conducted with the patient and caregiver following the superordinate sections to identify and eventually initiate a follow-up assessment, if necessary. For this purpose, the **care plan** (see chapter 3) will also be revised.*

|                                                                                       |                     |                                  |                        |
|---------------------------------------------------------------------------------------|---------------------|----------------------------------|------------------------|
| <b>Brief assessment</b>                                                               | <b>Month:</b> _____ | <b>Date:</b>  __ _   __ _   __ _ | <b>Duration:</b> _____ |
| Brief assessment conducted <input type="checkbox"/> yes   <input type="checkbox"/> no |                     |                                  |                        |
| Persons involved: _____                                                               |                     |                                  |                        |
| If „no“, reason: _____                                                                |                     |                                  |                        |



**UNIKLINIK  
KÖLN**

## Care & Case Management Manual – COCOS-MS

Communication, Coordination und Security for people with Multiple Sclerosis

### 2.1.1 Patient

Please enter here the assessment from the patient's perspective. His or her goals are to be written down with codes (see legend). The comments column can be used for details.

Date: |\_\_|\_|\_|\_|\_|\_| | Duration: \_\_\_\_\_

<sup>1</sup>Enter a value from 0 to 4 to indicate the *severity of the problem*, where 0 = ‚none‘, 1 = ‚moderate‘, 2 = ‚significant‘, 3 = ‚high‘ and 4 = ‚very high‘; 99 = ‚unknown‘.

<sup>2</sup>Enter a value from 0 to 4 to indicate the *manifestation of the resource*, where 0 = ‚none‘, 1 = ‚marginal‘, 2 = ‚sufficient‘, 3 = ‚good‘ and 4 = ‚very good‘; 99 = ‚unknown‘.

<sup>3</sup>Enter a value from 0 to 4 to indicate the *need*, where 0 = ‚no need‘, 1 = ‚need for monitoring‘, 2 = ‚need for action‘, 3 = ‚need for intervention‘ and 4 = ‚Crisis intervention‘; 99 = ‚unknown‘.

| Physical health patient (brief) |                      |                       |                   |      |         |
|---------------------------------|----------------------|-----------------------|-------------------|------|---------|
| Content                         | Problem <sup>1</sup> | Resource <sup>2</sup> | Need <sup>3</sup> | Goal | Comment |
| BKK 01 of MS (physical)         |                      |                       |                   |      |         |
| BKK 02 Other physical diseases  |                      |                       |                   |      |         |
| BKK 03 Medication               |                      |                       |                   |      |         |

| Mental health patient (brief) |                      |                       |                   |      |         |
|-------------------------------|----------------------|-----------------------|-------------------|------|---------|
| Content                       | Problem <sup>1</sup> | Resource <sup>2</sup> | Need <sup>3</sup> | Goal | Comment |
| BPK 01 Mental situation       |                      |                       |                   |      |         |



**UNIKLINIK  
KÖLN**

## Care & Case Management Manual – COCOS-MS

Communication, Coordination und Security for people with Multiple Sclerosis

| Autarky patient (brief)                                   |                      |                       |                   |      |         |
|-----------------------------------------------------------|----------------------|-----------------------|-------------------|------|---------|
| Content                                                   | Problem <sup>1</sup> | Resource <sup>2</sup> | Need <sup>3</sup> | Goal | Comment |
| <b>BAP 01</b> Self-sufficiency care                       |                      |                       |                   |      |         |
| <b>BAP 02</b> Self-sufficiency household and organization |                      |                       |                   |      |         |
| <b>BAP 03</b> Medical, nursing, therapeutic care          |                      |                       |                   |      |         |
| <b>BAP 04</b> Mobility                                    |                      |                       |                   |      |         |
| <b>BAP 05</b> Living                                      |                      |                       |                   |      |         |
| <b>BAP 06</b> Work and employment (e.g. voluntary work)   |                      |                       |                   |      |         |
| <b>BAP 07</b> Financial and social situation              |                      |                       |                   |      |         |

| Social Situation und participation patient (brief)        |                      |                       |                   |      |         |
|-----------------------------------------------------------|----------------------|-----------------------|-------------------|------|---------|
| Content                                                   | Problem <sup>1</sup> | Resource <sup>2</sup> | Need <sup>3</sup> | Goal | Comment |
| <b>BSP 01</b> Involvement of family and friends           |                      |                       |                   |      |         |
| <b>BSP 02</b> Role as e.g. partner, child, parent, friend |                      |                       |                   |      |         |
| <b>BSP 03</b> Pursuing hobbies/interests                  |                      |                       |                   |      |         |
| <b>BSP 04</b> Cultural/social/political participation     |                      |                       |                   |      |         |
| <b>BSP 05</b> Spiritual/pastoral support                  |                      |                       |                   |      |         |



UNIKLINIK  
KÖLN

## Care & Case Management Manual – COCOS-MS

Communication, Coordination und Security for people with Multiple Sclerosis

Comments:





**UNIKLINIK  
KÖLN**

## Care & Case Management Manual – COCOS-MS

Communication, Coordination und Security for people with Multiple Sclerosis

### 2.1.2 Caregiver

Please enter here the caregiver's needs. His or her goals are to be written down with codes (see legend). The comments column can be used for details.

Date: |\_\_|\_|\_\_|\_|\_|\_|\_|      Duration: \_\_\_\_\_

<sup>1</sup>Enter a value from 0 to 4 to indicate the *severity of the problem*, where 0 = ,none', 1 = ,moderate', 2 = ,significant', 3 = ,high' and 4 = ,very high'; 99 = ,unknown'.

<sup>2</sup>Enter a value from 0 to 4 to indicate the *manifestation of the resource*, where 0 = ,none', 1 = ,marginal', 2 = ,sufficient', 3 = ,good' and 4 = ,very good'; 99 = ,unknown'.

<sup>3</sup>Enter a value from 0 to 4 to indicate the *need*, where 0 = ,no need', 1 = ,need for monitoring', 2 = ,need for action', 3 = ,need for intervention' and 4 = ,Crisis intervention'; 99 = ,unknown'.

‘

| Physical health caregiver          |                      |                       |                   |      |         |
|------------------------------------|----------------------|-----------------------|-------------------|------|---------|
| Content                            | Problem <sup>1</sup> | Resource <sup>2</sup> | Need <sup>3</sup> | Goal | Comment |
| BKB 01 Physical diseases           |                      |                       |                   |      |         |
| BKB 02 Physical burden due to care |                      |                       |                   |      |         |

| Mental health caregiver              |                      |                       |                   |      |         |
|--------------------------------------|----------------------|-----------------------|-------------------|------|---------|
| Content                              | Problem <sup>1</sup> | Resource <sup>2</sup> | Need <sup>3</sup> | Goal | Comment |
| BPB 01 Emotional burden as caregiver |                      |                       |                   |      |         |
| BPB 02 Mental diseases               |                      |                       |                   |      |         |



**UNIKLINIK  
KÖLN**

## Care & Case Management Manual – COCOS-MS

Communication, Coordination und Security for people with Multiple Sclerosis

| Autarky Caregiver                                     |                      |                       |                   |      |         |
|-------------------------------------------------------|----------------------|-----------------------|-------------------|------|---------|
| Content                                               | Problem <sup>1</sup> | Resource <sup>2</sup> | Need <sup>3</sup> | Goal | Comment |
| <b>BBS 01</b> Housekeeping (shopping, cleaning, etc.) |                      |                       |                   |      |         |
| <b>BBS 02</b> Organization (e.g. appointments)        |                      |                       |                   |      |         |
| <b>BBS 03</b> Mobility                                |                      |                       |                   |      |         |
| <b>BBS 04</b> Living                                  |                      |                       |                   |      |         |
| <b>BBS 05</b> Work                                    |                      |                       |                   |      |         |
| <b>BBS 06</b> Financial protection                    |                      |                       |                   |      |         |

| Social involvement and participation caregiver            |                      |                       |                   |      |         |
|-----------------------------------------------------------|----------------------|-----------------------|-------------------|------|---------|
| Content                                                   | Problem <sup>1</sup> | Resource <sup>2</sup> | Need <sup>3</sup> | Goal | Comment |
| <b>BBE 01</b> Family involvement                          |                      |                       |                   |      |         |
| <b>BBE 02</b> Maintaining friendships                     |                      |                       |                   |      |         |
| <b>BBE 03</b> Role as e.g. partner, child, parent, friend |                      |                       |                   |      |         |
| <b>BBE 04</b> Pursuing hobbies/interests                  |                      |                       |                   |      |         |
| <b>BBE 05</b> Cultural/social/political participation     |                      |                       |                   |      |         |
| <b>BBE 06</b> Spiritual/pastoral support                  |                      |                       |                   |      |         |



UNIKLINIK  
KÖLN

## Care & Case Management Manual – COCOS-MS

Communication, Coordination und Security for people with Multiple Sclerosis

| Social involvement and participation caregiver |                      |                       |                   |      |         |
|------------------------------------------------|----------------------|-----------------------|-------------------|------|---------|
| Content                                        | Problem <sup>1</sup> | Resource <sup>2</sup> | Need <sup>3</sup> | Goal | Comment |
|                                                |                      |                       |                   |      |         |

Comments:



**UNIKLINIK  
KÖLN**

## Care & Case Management Manual – COCOS-MS

Communication, Coordination und Security for people with Multiple Sclerosis

### 2.2 Monitoring

Please document the current status of the action plan and implementation. If there is not enough space in the table, you can additionally use the supplementary sheet 'monitoring' (see appendix).

<sup>1</sup>Enter a value from 0 to 4 here to indicate satisfaction with the CCM actions, where 0 = 'very dissatisfied', 1 = 'dissatisfied', 2 = 'neither satisfied nor dissatisfied', 3 = 'satisfied' and 4 = 'very satisfied'; 99 = 'unknown'.

| Action | Initiated                | Continued                | Finished                 | Satisfaction <sup>1</sup> | Comment |
|--------|--------------------------|--------------------------|--------------------------|---------------------------|---------|
| 1.     | <input type="checkbox"/> | <input type="checkbox"/> | <input type="checkbox"/> |                           |         |
| 2.     | <input type="checkbox"/> | <input type="checkbox"/> | <input type="checkbox"/> |                           |         |
| 3.     | <input type="checkbox"/> | <input type="checkbox"/> | <input type="checkbox"/> |                           |         |
| 4.     | <input type="checkbox"/> | <input type="checkbox"/> | <input type="checkbox"/> |                           |         |
| 5.     | <input type="checkbox"/> | <input type="checkbox"/> | <input type="checkbox"/> |                           |         |
| 6.     | <input type="checkbox"/> | <input type="checkbox"/> | <input type="checkbox"/> |                           |         |
| 7.     | <input type="checkbox"/> | <input type="checkbox"/> | <input type="checkbox"/> |                           |         |
| 8.     | <input type="checkbox"/> | <input type="checkbox"/> | <input type="checkbox"/> |                           |         |
| 9.     | <input type="checkbox"/> | <input type="checkbox"/> | <input type="checkbox"/> |                           |         |
| 10.    | <input type="checkbox"/> | <input type="checkbox"/> | <input type="checkbox"/> |                           |         |



**UNIKLINIK  
KÖLN**

## Care & Case Management Manual – COCOS-MS

Communication, Coordination und Security for people with Multiple Sclerosis

|  |  |  |  |  |  |
|--|--|--|--|--|--|
|  |  |  |  |  |  |
|--|--|--|--|--|--|

Comments:



UNIKLINIK  
KÖLN

## Care & Case Management Manual – COCOS-MS

Communication, Coordination und Security for people with Multiple Sclerosis

### 2.3 Telephone contacts und monitoring

*Documentation of the weekly telephone contacts. Please document content, topics and patient satisfaction.*

#### 2.3.1 First telephone contact und monitoring

*Please insert here "Telephone contact and monitoring" (see 4.1.2.1) from the appendix.*

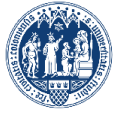

UNIKLINIK  
KÖLN

## Care & Case Management Manual – COCOS-MS

Communication, Coordination und Security for people with Multiple Sclerosis

### 2.3.2 Second telephone contact und monitoring

*Please insert here "Telephone contact and monitoring" (see 4.1.2.1) from the appendix.*



UNIKLINIK  
KÖLN

## Care & Case Management Manual – COCOS-MS

Communication, Coordination und Security for people with Multiple Sclerosis

### 2.3.3 Third telephone contact und monitoring

*Please insert here "Telephone contact and monitoring" (see 4.1.2.1) from the appendix.*



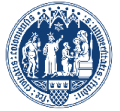UNIKLINIK  
KÖLN

## Care & Case Management Manual – COCOS-MS

Communication, Coordination und Security for people with Multiple Sclerosis

### 3. Month 3: Follow-up assessment/evaluation of participation/process control (monitoring, update care plan)/telephone contacts

The follow-up assessment corresponds to the initial assessment. It also evaluates the patient's participation and revises the **care plan** (see Chapter 3) to adapt it to the current situation.

#### 3.1 Follow-up assessment

Date: |\_\_| |\_\_| |\_\_| |\_\_| |\_\_| |\_\_| |\_\_| | Duration: \_\_\_\_\_

##### 3.1.1 Prescribed medication and pro re nata medication

| <b>Prescribed medication:</b> |             |        |                |            |            |
|-------------------------------|-------------|--------|----------------|------------|------------|
| Medication/active ingredient  | Application | Dosage | Dosage regimen | Indication | Prescriber |
|                               |             |        |                |            |            |
|                               |             |        |                |            |            |
|                               |             |        |                |            |            |
|                               |             |        |                |            |            |
|                               |             |        |                |            |            |
|                               |             |        |                |            |            |
|                               |             |        |                |            |            |
|                               |             |        |                |            |            |
|                               |             |        |                |            |            |
|                               |             |        |                |            |            |
|                               |             |        |                |            |            |
|                               |             |        |                |            |            |
|                               |             |        |                |            |            |



**UNIKLINIK  
KÖLN**

## Care & Case Management Manual – COCOS-MS

Communication, Coordination und Security for people with Multiple Sclerosis

| <b>Prescribed medication:</b> |             |        |                |            |            |
|-------------------------------|-------------|--------|----------------|------------|------------|
| Medication/active ingredient  | Application | Dosage | Dosage regimen | Indication | Prescriber |
|                               |             |        |                |            |            |
|                               |             |        |                |            |            |
|                               |             |        |                |            |            |
|                               |             |        |                |            |            |
|                               |             |        |                |            |            |

| <b>Pro re nata medication:</b> |             |        |                |            |            |
|--------------------------------|-------------|--------|----------------|------------|------------|
| Medication/active ingredient   | Application | Dosage | Dosage regimen | Indication | Prescriber |
|                                |             |        |                |            |            |
|                                |             |        |                |            |            |
|                                |             |        |                |            |            |
|                                |             |        |                |            |            |
|                                |             |        |                |            |            |
|                                |             |        |                |            |            |
|                                |             |        |                |            |            |
|                                |             |        |                |            |            |
|                                |             |        |                |            |            |
|                                |             |        |                |            |            |



## Care & Case Management Manual – COCOS-MS

Communication, Coordination und Security for people with Multiple Sclerosis

### 3.1.2 Patient

Please enter here the assessment from the patient's perspective. His or her goals are to be written down with codes. The comments column can be used for details. The codes used can be found in the legend.

The assessment should be made according to the following criteria. If assessment is not possible, code "99" = unknown needs to be entered.

#### Severity of the problem

0 = none: Patient experiences the situation as unproblematic and not stressful.

1 = moderate: The situation causes limitations that are sometimes experienced as problematic and slightly stressful by the patient.

2 = significant: The situation causes limitations that are often experienced as problematic and clearly stressful by the patient.

3 = high: The situation causes limitations that are predominantly experienced as problematic and highly stressful by the patient.

4 = very high: The situation causes limitations that are consistently experienced as problematic and extremely stressful by the patient.

#### Resources

0 = none: Patient does not identify own abilities, strengths or capabilities within themselves and/or their environment that could contribute to problem-solving.

1 = marginal: Patient identifies individual abilities, strengths or capabilities within themselves and/or their environment which may still need to be developed and could contribute to problem-solving.

2 = sufficient: Patient identifies general abilities, strengths or capabilities within themselves and/or their environment which can contribute to problem-solving and can probably be accessed.

3 = good: Patient recognizes many abilities, strengths or capabilities within themselves and/or their environment which can contribute to problem-solving and which - if not already been done - are highly likely to be accessed.

4 = very good: Patient recognizes a great number of abilities, strengths or capabilities within themselves and/or their environment which can make a specific contribution to problem-solving and can be used quickly.



UNIKLINIK  
KÖLN

## Care & Case Management Manual – COCOS-MS

Communication, Coordination und Security for people with Multiple Sclerosis

*Need: The Case Manager will assess the needs for an intervention which results from comparing and weighing the problem and resources, without determining them mathematically. This assessment can also be made throughout the follow-up assessment.*

- 0 = no need: *There is no need for an intervention as no problem has been identified or the problem can be solved by means of existing resources.*
- 1 = Need for monitoring: *There is a problem that can widely be overcome with existing resources. It should regularly be checked for changes as external support may be useful or necessary at times.*
- 2 = Need for action: *There is a problem that requires additional resources to be (re)developed in order to deal with it. External intervention is necessary.*
- 3 = Need for intervention: *There is a problem which basically requires resources to deal with it. External intervention is necessary, otherwise there is a high risk for the situation to worsen.*
- 4 = Crisis intervention: *Immediate intervention is required to prevent or respond to an escalation of the situation. The assessment must be discontinued and can only be continued once the situation has stabilized.*

### Section health

<sup>1</sup>Enter a value from 0 to 4 to indicate the *severity of the problem*, where 0 = ,none', 1 = ,moderate', 2 = ,significant', 3 = ,high' and 4 = ,very high'; 99 = ,unknown'.

<sup>2</sup>Enter a value from 0 to 4 to indicate the *manifestation of the resource*, where 0 = ,none', 1 = ,marginal', 2 = ,sufficient', 3 = ,good' and 4 = ,very good'; 99 = ,unknown'.

<sup>3</sup>Enter a value from 0 to 4 to indicate the *need*, where 0 = ,no need', 1 = ,need for monitoring', 2 = ,need for action', 3 = ,need for intervention' and 4 = ,Crisis intervention'; 99 = ,unknown'.



**UNIKLINIK  
KÖLN**

## Care & Case Management Manual – COCOS-MS

Communication, Coordination und Security for people with Multiple Sclerosis

| Physical health patient (brief) |                      |                       |                   |      |         |
|---------------------------------|----------------------|-----------------------|-------------------|------|---------|
| Content                         | Problem <sup>1</sup> | Resource <sup>2</sup> | Need <sup>3</sup> | Goal | Comment |
| BKK 01 of MS (physical)         |                      |                       |                   |      |         |
| BKK 02 Other physical diseases  |                      |                       |                   |      |         |
| BKK 03 Medication               |                      |                       |                   |      |         |

| Physical health patient (long)                                |                      |                       |                   |      |         |
|---------------------------------------------------------------|----------------------|-----------------------|-------------------|------|---------|
| Content                                                       | Problem <sup>1</sup> | Resource <sup>2</sup> | Need <sup>3</sup> | Goal | Comment |
| BGK 01 Spasticity, paralysis, numbness, misperceptions (etc.) |                      |                       |                   |      |         |
| BGK 02 Pain                                                   |                      |                       |                   |      |         |
| BGK 03 Coordination, fine motor skills                        |                      |                       |                   |      |         |
| BGK 04 Swallowing, speech and language disorders              |                      |                       |                   |      |         |
| BGK 05 Vision (including double vision etc.)...               |                      |                       |                   |      |         |
| BGK 06 Hearing, smell, taste                                  |                      |                       |                   |      |         |
| BGK 07 Disease progression (MS)                               |                      |                       |                   |      |         |
| BGK 08 Difficulty breathing                                   |                      |                       |                   |      |         |
| BGK 09 Skin (including wounds)                                |                      |                       |                   |      |         |



**UNIKLINIK  
KÖLN**

## Care & Case Management Manual – COCOS-MS

Communication, Coordination und Security for people with Multiple Sclerosis

| Physical health patient (long)                                                                       |                      |                       |                   |      |         |
|------------------------------------------------------------------------------------------------------|----------------------|-----------------------|-------------------|------|---------|
| Content                                                                                              | Problem <sup>1</sup> | Resource <sup>2</sup> | Need <sup>3</sup> | Goal | Comment |
| <b>BGK 10</b> Urogenital tract (urinary retention, incontinence, menstruation, erectile dysfunction) |                      |                       |                   |      |         |
| <b>BGK 11</b> Gastrointestinal tract (nausea, vomiting, constipation, fecal incontinence)            |                      |                       |                   |      |         |
| <b>BGK 12</b> Other internal diseases (cardiovascular, diabetes, hypertension, lipometabolism)       |                      |                       |                   |      |         |
| <b>BGK 13</b> Weight                                                                                 |                      |                       |                   |      |         |
| <b>BGK 14</b> Access to routine health screenings                                                    |                      |                       |                   |      |         |
| <b>BGK 15</b> Dealing with immunotherapeutic agents                                                  |                      |                       |                   |      |         |
| <b>BGK 16</b> Dealing with other medication                                                          |                      |                       |                   |      |         |

| Mental health patient (brief)  |                      |                       |                   |      |         |
|--------------------------------|----------------------|-----------------------|-------------------|------|---------|
| Content                        | Problem <sup>1</sup> | Resource <sup>2</sup> | Need <sup>3</sup> | Goal | Comment |
| <b>BPK 01</b> Mental situation |                      |                       |                   |      |         |



**UNIKLINIK  
KÖLN**

## Care & Case Management Manual – COCOS-MS

Communication, Coordination und Security for people with Multiple Sclerosis

| Mental health patient (long)                    |                      |                       |                   |      |         |
|-------------------------------------------------|----------------------|-----------------------|-------------------|------|---------|
| Content                                         | Problem <sup>1</sup> | Resource <sup>2</sup> | Need <sup>3</sup> | Goal | Comment |
| BGP 01 Dealing with stress/stressful situations |                      |                       |                   |      |         |
| BGP 02 Concentration                            |                      |                       |                   |      |         |
| BGP 03 Cognition                                |                      |                       |                   |      |         |
| BGP 04 Disorientation                           |                      |                       |                   |      |         |
| BGP 05 Personality changes                      |                      |                       |                   |      |         |
| BGP 06 Fatigue                                  |                      |                       |                   |      |         |
| BGP 07 Depression                               |                      |                       |                   |      |         |
| BGP 08 Depressive mood                          |                      |                       |                   |      |         |
| BGP 09 Suicidal thoughts                        |                      |                       |                   |      |         |
| BGP 10 Anxiety /inner restlessness              |                      |                       |                   |      |         |
| BGP 11 Anxiety /panic attacks                   |                      |                       |                   |      |         |
| BGP 12 Grief                                    |                      |                       |                   |      |         |
| BGP 13 Being able to express emotions           |                      |                       |                   |      |         |
| BGP 14 Biographical disruption                  |                      |                       |                   |      |         |



**UNIKLINIK  
KÖLN**

## Care & Case Management Manual – COCOS-MS

Communication, Coordination und Security for people with Multiple Sclerosis

| Mental health patient (long)        |                      |                       |                   |      |         |
|-------------------------------------|----------------------|-----------------------|-------------------|------|---------|
| Content                             | Problem <sup>1</sup> | Resource <sup>2</sup> | Need <sup>3</sup> | Goal | Comment |
| BGP 15 Autonomy                     |                      |                       |                   |      |         |
| BGP 16 Smoking                      |                      |                       |                   |      |         |
| BGP 17 Alcohol and drug consumption |                      |                       |                   |      |         |

### Section autarky

<sup>1</sup>Enter a value from 0 to 4 to indicate the *severity of the problem*, where 0 = ,none', 1 = ,moderate', 2 = ,significant', 3 = ,high' and 4 = ,very high'; 99 = ,unknown'.

<sup>2</sup>Enter a value from 0 to 4 to indicate the *manifestation of the resource*, where 0 = ,none', 1 = ,marginal', 2 = ,sufficient', 3 = ,good' and 4 = ,very good'; 99 = ,unknown'.

<sup>3</sup>Enter a value from 0 to 4 to indicate the *need*, where 0 = ,no need', 1 = ,need for monitoring', 2 = ,need for action', 3 = ,need for intervention' and 4 = ,Crisis intervention'; 99 = ,unknown'.

| Autarky patient (brief)                            |                      |                       |                   |      |         |
|----------------------------------------------------|----------------------|-----------------------|-------------------|------|---------|
| Content                                            | Problem <sup>1</sup> | Resource <sup>2</sup> | Need <sup>3</sup> | Goal | Comment |
| BAP 01 Self-sufficiency care                       |                      |                       |                   |      |         |
| BAP 02 Self-sufficiency household and organization |                      |                       |                   |      |         |
| BAP 03 Medical, nursing, therapeutic care          |                      |                       |                   |      |         |
| BAP 04 Mobility                                    |                      |                       |                   |      |         |





**UNIKLINIK  
KÖLN**

## Care & Case Management Manual – COCOS-MS

Communication, Coordination und Security for people with Multiple Sclerosis

| Autarky patient (brief)                             |                      |                       |                   |      |         |
|-----------------------------------------------------|----------------------|-----------------------|-------------------|------|---------|
| Content                                             | Problem <sup>1</sup> | Resource <sup>2</sup> | Need <sup>3</sup> | Goal | Comment |
| BAP 05 Living                                       |                      |                       |                   |      |         |
| BAP 06 Work and employment<br>(e.g. volunteer work) |                      |                       |                   |      |         |
| BAP 07 Financial and social<br>situation            |                      |                       |                   |      |         |

| Self-sufficiency patient                     |                      |                       |                   |      |         |
|----------------------------------------------|----------------------|-----------------------|-------------------|------|---------|
| Content                                      | Problem <sup>1</sup> | Resource <sup>2</sup> | Need <sup>3</sup> | Goal | Comment |
| BSV 01 Satisfaction with outer<br>appearance |                      |                       |                   |      |         |
| BSV 02 Washing upper body                    |                      |                       |                   |      |         |
| BSV 03 Washing lower body                    |                      |                       |                   |      |         |
| BSV 04 Incontinence care                     |                      |                       |                   |      |         |
| BSV 05 Showering/taking a bath               |                      |                       |                   |      |         |
| BSV 06 Dental care                           |                      |                       |                   |      |         |
| BSV 07 Hair/nail care                        |                      |                       |                   |      |         |
| BSV 08 Putting on clothes incl.<br>shoes     |                      |                       |                   |      |         |
| BSV 09 Cleaning the apartment                |                      |                       |                   |      |         |



**UNIKLINIK  
KÖLN**

## Care & Case Management Manual – COCOS-MS

Communication, Coordination und Security for people with Multiple Sclerosis

| Self-sufficiency patient                   |                      |                       |                   |      |         |
|--------------------------------------------|----------------------|-----------------------|-------------------|------|---------|
| Content                                    | Problem <sup>1</sup> | Resource <sup>2</sup> | Need <sup>3</sup> | Goal | Comment |
| BSV 10 Eating independently                |                      |                       |                   |      |         |
| BSV 11 Drinking independently              |                      |                       |                   |      |         |
| BSV 12 Preparing food                      |                      |                       |                   |      |         |
| BSV 13 Shopping                            |                      |                       |                   |      |         |
| BSV 14 Preparing medication                |                      |                       |                   |      |         |
| BSV 15 Procurement of medication           |                      |                       |                   |      |         |
| BSV 16 Own organization of daily structure |                      |                       |                   |      |         |
| BSV 17 Coordinating appointments           |                      |                       |                   |      |         |

| Medical, nursing und therapeutic care patient |                      |                       |                   |      |         |
|-----------------------------------------------|----------------------|-----------------------|-------------------|------|---------|
| Content                                       | Problem <sup>1</sup> | Resource <sup>2</sup> | Need <sup>3</sup> | Goal | Comment |
| BMP 01 General medical care                   |                      |                       |                   |      |         |
| BMP 02 Neurological care                      |                      |                       |                   |      |         |
| BMP 03 Other specialist care                  |                      |                       |                   |      |         |



**UNIKLINIK  
KÖLN**

## Care & Case Management Manual – COCOS-MS

Communication, Coordination und Security for people with Multiple Sclerosis

| Medical, nursing und therapeutic care patient                                  |                      |                       |                   |      |         |
|--------------------------------------------------------------------------------|----------------------|-----------------------|-------------------|------|---------|
| Content                                                                        | Problem <sup>1</sup> | Resource <sup>2</sup> | Need <sup>3</sup> | Goal | Comment |
| <b>BMP 04</b> Nursing care                                                     |                      |                       |                   |      |         |
| <b>BMP 05</b> Physiotherapy                                                    |                      |                       |                   |      |         |
| <b>BMP 06</b> Occupational therapy                                             |                      |                       |                   |      |         |
| <b>BMP 07</b> Speech therapy                                                   |                      |                       |                   |      |         |
| <b>BMP 08</b> Psychotherapy                                                    |                      |                       |                   |      |         |
| <b>BMP 09</b> Information about MS<br>(Follow-up, therapy, self-help services) |                      |                       |                   |      |         |

| Mobility patient                            |                      |                       |                   |      |         |
|---------------------------------------------|----------------------|-----------------------|-------------------|------|---------|
| Content                                     | Problem <sup>1</sup> | Resource <sup>2</sup> | Need <sup>3</sup> | Goal | Comment |
| <b>BMO 01</b> Walking within the apartment  |                      |                       |                   |      |         |
| <b>BMO 02</b> Walking outside the apartment |                      |                       |                   |      |         |
| <b>BMO 03</b> Going up stairs               |                      |                       |                   |      |         |
| <b>BMO 04</b> Standing securely             |                      |                       |                   |      |         |



**UNIKLINIK  
KÖLN**

## Care & Case Management Manual – COCOS-MS

Communication, Coordination und Security for people with Multiple Sclerosis

| Mobility patient                                                                          |                      |                       |                   |      |         |
|-------------------------------------------------------------------------------------------|----------------------|-----------------------|-------------------|------|---------|
| Content                                                                                   | Problem <sup>1</sup> | Resource <sup>2</sup> | Need <sup>3</sup> | Goal | Comment |
| <b>BMO 05</b> Access to individual means of transport (car, bicycle, Scooter, Motorcycle) |                      |                       |                   |      |         |
| <b>BMO 06</b> Use of individual means of transport                                        |                      |                       |                   |      |         |
| <b>BMO 07</b> Access to public transport                                                  |                      |                       |                   |      |         |
| <b>BMO 08</b> Use of public transport                                                     |                      |                       |                   |      |         |

| Living patient                                             |                      |                       |                   |      |         |
|------------------------------------------------------------|----------------------|-----------------------|-------------------|------|---------|
| Content                                                    | Problem <sup>1</sup> | Resource <sup>2</sup> | Need <sup>3</sup> | Goal | Comment |
| <b>BWO 01</b> Place of residence                           |                      |                       |                   |      |         |
| <b>BWO 02</b> Type of apartment / house / apartment / room |                      |                       |                   |      |         |
| <b>BWO 03</b> Access to apartment / house etc.             |                      |                       |                   |      |         |
| <b>BWO 04</b> Accessibility living and sleeping rooms      |                      |                       |                   |      |         |
| <b>BWO 05</b> Accessibility bathroom                       |                      |                       |                   |      |         |
| <b>BWO 06</b> Accessibility kitchen and other premises     |                      |                       |                   |      |         |
| <b>BWO 07</b> Accessibility balcony / terrace / garden     |                      |                       |                   |      |         |



**UNIKLINIK  
KÖLN**

## Care & Case Management Manual – COCOS-MS

Communication, Coordination und Security for people with Multiple Sclerosis

| Work and employment patient                               |                      |                       |                   |      |         |
|-----------------------------------------------------------|----------------------|-----------------------|-------------------|------|---------|
| Content                                                   | Problem <sup>1</sup> | Resource <sup>2</sup> | Need <sup>3</sup> | Goal | Comment |
| <b>BAB 01</b> Employability                               |                      |                       |                   |      |         |
| <b>BAB 02</b> Work ability                                |                      |                       |                   |      |         |
| <b>BAB 03</b> Working hours                               |                      |                       |                   |      |         |
| <b>BAB 04</b> Workplace arrangement                       |                      |                       |                   |      |         |
| <b>BAB 05</b> Meaningful activities (e.g. volunteer work) |                      |                       |                   |      |         |

| Financial and social law situation patient                    |                      |                       |                   |      |         |
|---------------------------------------------------------------|----------------------|-----------------------|-------------------|------|---------|
| Content                                                       | Problem <sup>1</sup> | Resource <sup>2</sup> | Need <sup>3</sup> | Goal | Comment |
| <b>BFS 01</b> Financial security of subsistence               |                      |                       |                   |      |         |
| <b>BFS 02</b> Financial security of care                      |                      |                       |                   |      |         |
| <b>BFS 03</b> Financing of housing adaptation                 |                      |                       |                   |      |         |
| <b>BFS 04</b> Financing of medical aids                       |                      |                       |                   |      |         |
| <b>BFS 05</b> Social insurance agency (e.g. health insurance) |                      |                       |                   |      |         |
| <b>BFS 06</b> Debts                                           |                      |                       |                   |      |         |
| <b>BFS 07</b> Old-age provision                               |                      |                       |                   |      |         |



**UNIKLINIK  
KÖLN**

## Care & Case Management Manual – COCOS-MS

Communication, Coordination und Security for people with Multiple Sclerosis

| Financial and social law situation patient                       |                      |                       |                   |      |         |
|------------------------------------------------------------------|----------------------|-----------------------|-------------------|------|---------|
| Content                                                          | Problem <sup>1</sup> | Resource <sup>2</sup> | Need <sup>3</sup> | Goal | Comment |
| <b>BFS 08</b> Being able to represent legal interests themselves |                      |                       |                   |      |         |
| <b>BFS 09</b> Recognition of (severe) disability                 |                      |                       |                   |      |         |
| <b>BFS 10</b> Other social law needs (e.g. custody)              |                      |                       |                   |      |         |

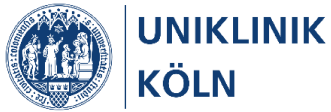

## Care & Case Management Manual – COCOS-MS

Communication, Coordination und Security for people with Multiple Sclerosis

### Section social situation und participation

<sup>1</sup>Enter a value from 0 to 4 to indicate the *severity of the problem*, where 0 = ,none', 1 = ,moderate', 2 = ,significant', 3 = ,high' and 4 = ,very high'; 99 = ,unknown'.

<sup>2</sup>Enter a value from 0 to 4 to indicate the *manifestation of the resource*, where 0 = ,none', 1 = ,marginal', 2 = ,sufficient', 3 = ,good' and 4 = ,very good'; 99 = ,unknown'.

<sup>3</sup>Enter a value from 0 to 4 to indicate the *need*, where 0 = ,no need', 1 = ,need for monitoring', 2 = ,need for action', 3 = ,need for intervention' and 4 = ,Crisis intervention'; 99 = ,unknown'.

| Social Situation und participation patient (brief) |                      |                       |                   |      |         |
|----------------------------------------------------|----------------------|-----------------------|-------------------|------|---------|
| Content                                            | Problem <sup>1</sup> | Resource <sup>2</sup> | Need <sup>3</sup> | Goal | Comment |
| BSP 01 Involvement of family and friends           |                      |                       |                   |      |         |
| BSP 02 Role as e.g. partner, child, parent, friend |                      |                       |                   |      |         |
| BSP 03 Pursuing hobbies/interests                  |                      |                       |                   |      |         |
| BSP 04 Cultural/social/political participation     |                      |                       |                   |      |         |
| BSP 05 Spiritual/pastoral support                  |                      |                       |                   |      |         |

| Communication patient                    |                      |                       |                   |      |         |
|------------------------------------------|----------------------|-----------------------|-------------------|------|---------|
| Content                                  | Problem <sup>1</sup> | Resource <sup>2</sup> | Need <sup>3</sup> | Goal | Comment |
| BKO 01 Use of computer/tablet/smartphone |                      |                       |                   |      |         |
| BKO 02 Use of mobile/telephone           |                      |                       |                   |      |         |



**UNIKLINIK  
KÖLN**

## Care & Case Management Manual – COCOS-MS

Communication, Coordination und Security for people with Multiple Sclerosis

| Communication patient                                                        |                      |                       |                   |      |         |
|------------------------------------------------------------------------------|----------------------|-----------------------|-------------------|------|---------|
| Content                                                                      | Problem <sup>1</sup> | Resource <sup>2</sup> | Need <sup>3</sup> | Goal | Comment |
| <b>BKO 03</b> Access to information media (internet, television, newspapers) |                      |                       |                   |      |         |
| <b>BKO 04</b> Writing, reading, listening                                    |                      |                       |                   |      |         |

| Social inclusion patient                                  |                      |                       |                   |      |         |
|-----------------------------------------------------------|----------------------|-----------------------|-------------------|------|---------|
| Content                                                   | Problem <sup>1</sup> | Resource <sup>2</sup> | Need <sup>3</sup> | Goal | Comment |
| <b>BSE 01</b> Feeling like they belong                    |                      |                       |                   |      |         |
| <b>BSE 02</b> Concern for family/relatives                |                      |                       |                   |      |         |
| <b>BSE 03</b> Maintaining friendships                     |                      |                       |                   |      |         |
| <b>BSE 04</b> Participation in events with family/friends |                      |                       |                   |      |         |
| <b>BSE 05</b> Being a parent, son, daughter, friend       |                      |                       |                   |      |         |
| <b>BSE 06</b> Being a partner                             |                      |                       |                   |      |         |
| <b>BSE 07</b> Love and sex life                           |                      |                       |                   |      |         |
| <b>BSE 08</b> Family planning, access to contraceptives   |                      |                       |                   |      |         |





**UNIKLINIK  
KÖLN**

## Care & Case Management Manual – COCOS-MS

Communication, Coordination und Security for people with Multiple Sclerosis

| Social and political participation patient                                            |                      |                       |                   |      |         |
|---------------------------------------------------------------------------------------|----------------------|-----------------------|-------------------|------|---------|
| Content                                                                               | Problem <sup>1</sup> | Resource <sup>2</sup> | Need <sup>3</sup> | Goal | Comment |
| <b>BGP 01</b> Participation in neighborhood/club life                                 |                      |                       |                   |      |         |
| <b>BGP 02</b> Access to educational opportunities (e.g. adult education center “VHS”) |                      |                       |                   |      |         |
| <b>BGP 03</b> Political participation (right to vote, demonstrations)                 |                      |                       |                   |      |         |

| Recreational activities patient                                  |                      |                       |                   |      |         |
|------------------------------------------------------------------|----------------------|-----------------------|-------------------|------|---------|
| Content                                                          | Problem <sup>1</sup> | Resource <sup>2</sup> | Need <sup>3</sup> | Goal | Comment |
| <b>BFG 01</b> Sufficient leisure time                            |                      |                       |                   |      |         |
| <b>BFG 02</b> Pursuing hobbies/interests                         |                      |                       |                   |      |         |
| <b>BFG 03</b> Doing sports                                       |                      |                       |                   |      |         |
| <b>BFG 04</b> Use of cultural events (cinema, theatre, concerts) |                      |                       |                   |      |         |
| <b>BFG 05</b> Going on vacation                                  |                      |                       |                   |      |         |

| Religion and spirituality patient                          |                      |                       |                   |      |         |
|------------------------------------------------------------|----------------------|-----------------------|-------------------|------|---------|
| Content                                                    | Problem <sup>1</sup> | Resource <sup>2</sup> | Need <sup>3</sup> | Goal | Comment |
| <b>BRS 01</b> Opportunity to express religion/spirituality |                      |                       |                   |      |         |



**UNIKLINIK  
KÖLN**

## Care & Case Management Manual – COCOS-MS

Communication, Coordination und Security for people with Multiple Sclerosis

| Religion and spirituality patient              |                      |                       |                   |      |         |
|------------------------------------------------|----------------------|-----------------------|-------------------|------|---------|
| Content                                        | Problem <sup>1</sup> | Resource <sup>2</sup> | Need <sup>3</sup> | Goal | Comment |
| BRS 02 Contact with spiritual/pastoral support |                      |                       |                   |      |         |
| BRS 03 Finding own spirituality/religion       |                      |                       |                   |      |         |

Comments:



**UNIKLINIK  
KÖLN**

## Care & Case Management Manual – COCOS-MS

Communication, Coordination und Security for people with Multiple Sclerosis

### 3.1.3. Caregiver

**Date:** |\_\_| |\_\_| |\_\_| |\_\_| |\_\_| |\_\_| **Duration:** \_\_\_\_\_

Please enter here the assessment from the caregiver's perspective. His or her goals are to be written down with codes. The comments column can be used for details. The codes used can be found in the legend.

The assessment should be made according to the following criteria. If assessment is not possible, code "99" = unknown needs to be entered.

#### Severity of the problem

- 0 = none: Caregiver experiences the situation as unproblematic and not stressful.
- 1 = moderate: The situation causes limitations that are sometimes experienced as problematic and slightly stressful by the caregiver.
- 2 = significant: The situation causes limitations that are often experienced as problematic and clearly stressful by the caregiver.
- 3 = high: The situation causes limitations that are predominantly experienced as problematic and highly stressful by the caregiver.
- 4. = very high: The situation causes limitations that are consistently experienced as problematic and extremely stressful by the caregiver.

#### Resources

- 0 = none: Caregiver does not identify own abilities, strengths or capabilities within themselves and/or their environment that could contribute to problem-solving.
- 1 = marginal: Caregiver identifies individual abilities, strengths or capabilities within themselves and/or their environment which may still need to be developed and could contribute to problem-solving.
- 2 = sufficient: Caregiver identifies general abilities, strengths or capabilities within themselves and/or their environment which can contribute to problem-solving and can probably be accessed.



UNIKLINIK  
KÖLN

## Care & Case Management Manual – COCOS-MS

Communication, Coordination und Security for people with Multiple Sclerosis

3 = good: *Caregiver recognizes many abilities, strengths or capabilities within themselves and/or their environment which can contribute to problem-solving and which - if not already been done - are highly likely to be accessed.*

4 = very good: *Caregiver recognizes a great number of abilities, strengths or capabilities within themselves and/or their environment which can make a specific contribution to problem-solving and can be used quickly.*

Need: *The Case Manager will assess the needs for an intervention which results from comparing and weighing the problem and resources, without determining them mathematically. This assessment can also be made throughout the follow-up assessment.*

0 = No need: *There is no need for an intervention as no problem has been identified or the problem can be solved by means of existing resources.*

1 = Need for monitoring: *There is a problem that can widely be overcome with existing resources. It should regularly be checked for changes as external support may be useful or necessary at times.*

2 = Need for action: *There is a problem that requires additional resources to be (re)developed in order to deal with it. External intervention is necessary.*

3 = Need for intervention: *There is a problem which basically requires resources to deal with it. External intervention is necessary, otherwise there is a high risk for the situation to worsen.*

4 = Crisis intervention: *Immediate intervention is required to prevent or respond to an escalation of the situation. The assessment must be discontinued and can only be continued once the situation has stabilized.*



**UNIKLINIK  
KÖLN**

## Care & Case Management Manual – COCOS-MS

Communication, Coordination und Security for people with Multiple Sclerosis

<sup>1</sup>Enter a value from 0 to 4 to indicate the *severity of the problem*, where 0 = ‚none‘, 1 = ‚moderate‘, 2 = ‚significant‘, 3 = ‚high‘ and 4 = ‚very high‘; 99 = ‚unknown‘.

<sup>2</sup>Enter a value from 0 to 4 to indicate the *manifestation of the resource*, where 0 = ‚none‘, 1 = ‚marginal‘, 2 = ‚sufficient‘, 3 = ‚good‘ and 4 = ‚very good‘; 99 = ‚unknown‘.

<sup>3</sup>Enter a value from 0 to 4 to indicate the *need*, where 0 = ‚no need‘, 1 = ‚need for monitoring‘, 2 = ‚need for action‘, 3 = ‚need for intervention‘ and 4 = ‚Crisis intervention‘; 99 = ‚unknown‘.

| Physical health caregiver          |                      |                       |                   |      |         |
|------------------------------------|----------------------|-----------------------|-------------------|------|---------|
| Content                            | Problem <sup>1</sup> | Resource <sup>2</sup> | Need <sup>3</sup> | Goal | Comment |
| BKB 01 Physical diseases           |                      |                       |                   |      |         |
| BKB 02 Physical burden due to care |                      |                       |                   |      |         |

| Mental health caregiver              |                      |                       |                   |      |         |
|--------------------------------------|----------------------|-----------------------|-------------------|------|---------|
| Content                              | Problem <sup>1</sup> | Resource <sup>2</sup> | Need <sup>3</sup> | Goal | Comment |
| BPB 01 Emotional burden as caregiver |                      |                       |                   |      |         |
| BPB 02 Mental diseases               |                      |                       |                   |      |         |

| Autarky caregiver                              |                      |                       |                   |      |         |
|------------------------------------------------|----------------------|-----------------------|-------------------|------|---------|
| Content                                        | Problem <sup>1</sup> | Resource <sup>2</sup> | Need <sup>3</sup> | Goal | Comment |
| BBS 01 Housekeeping (shopping, cleaning, etc.) |                      |                       |                   |      |         |
| BBS 02 Organization (e.g. appointments)        |                      |                       |                   |      |         |
| BBS 03 Mobility                                |                      |                       |                   |      |         |



**UNIKLINIK  
KÖLN**

## Care & Case Management Manual – COCOS-MS

Communication, Coordination und Security for people with Multiple Sclerosis

| Autarky caregiver           |                      |                       |                   |      |         |
|-----------------------------|----------------------|-----------------------|-------------------|------|---------|
| Content                     | Problem <sup>1</sup> | Resource <sup>2</sup> | Need <sup>3</sup> | Goal | Comment |
| BBS 04 Living               |                      |                       |                   |      |         |
| BBS 05 Work                 |                      |                       |                   |      |         |
| BBS 06 Financial protection |                      |                       |                   |      |         |

| Social involvement and participation caregiver     |                      |                       |                   |      |         |
|----------------------------------------------------|----------------------|-----------------------|-------------------|------|---------|
| Content                                            | Problem <sup>1</sup> | Resource <sup>2</sup> | Need <sup>3</sup> | Goal | Comment |
| BBE 01 Family involvement                          |                      |                       |                   |      |         |
| BBE 02 Maintaining friendships                     |                      |                       |                   |      |         |
| BBE 03 Role as e.g. partner, child, parent, friend |                      |                       |                   |      |         |
| BBE 04 Pursuing hobbies/interests                  |                      |                       |                   |      |         |
| BBE 05 Cultural/social/political participation     |                      |                       |                   |      |         |
| BBE 06 Spiritual/pastoral support                  |                      |                       |                   |      |         |



UNIKLINIK  
KÖLN

## Care & Case Management Manual – COCOS-MS

Communication, Coordination und Security for people with Multiple Sclerosis

Comments:

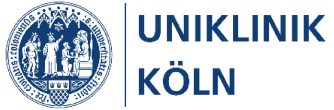

## Care & Case Management Manual – COCOS-MS

Communication, Coordination und Security for people with Multiple Sclerosis

### 3.2 Evaluation of participation

Please let the patient estimate to what extent his/her participation have been realized.

| To what extent is this statement true?            | 0 = very little   1 = little   2 = moderate   3 = much   4 = very much                                                                         | Comments |
|---------------------------------------------------|------------------------------------------------------------------------------------------------------------------------------------------------|----------|
| My wishes have been realized.                     | <input type="checkbox"/> 0   <input type="checkbox"/> 1   <input type="checkbox"/> 2   <input type="checkbox"/> 3   <input type="checkbox"/> 4 |          |
| I choose the service providers.                   | <input type="checkbox"/> 0   <input type="checkbox"/> 1   <input type="checkbox"/> 2   <input type="checkbox"/> 3   <input type="checkbox"/> 4 |          |
| I felt relieved by the implementation of actions. | <input type="checkbox"/> 0   <input type="checkbox"/> 1   <input type="checkbox"/> 2   <input type="checkbox"/> 3   <input type="checkbox"/> 4 |          |
| I choose the actions.                             | <input type="checkbox"/> 0   <input type="checkbox"/> 1   <input type="checkbox"/> 2   <input type="checkbox"/> 3   <input type="checkbox"/> 4 |          |
| I have a say.                                     | <input type="checkbox"/> 0   <input type="checkbox"/> 1   <input type="checkbox"/> 2   <input type="checkbox"/> 3   <input type="checkbox"/> 4 |          |
| My values and ideas are taken into account.       | <input type="checkbox"/> 0   <input type="checkbox"/> 1   <input type="checkbox"/> 2   <input type="checkbox"/> 3   <input type="checkbox"/> 4 |          |
| The level of support I receive is appropriate.    | <input type="checkbox"/> 0   <input type="checkbox"/> 1   <input type="checkbox"/> 2   <input type="checkbox"/> 3   <input type="checkbox"/> 4 |          |
| I live a self-determined life.                    | <input type="checkbox"/> 0   <input type="checkbox"/> 1   <input type="checkbox"/> 2   <input type="checkbox"/> 3   <input type="checkbox"/> 4 |          |
| I feel relieved.                                  | <input type="checkbox"/> 0   <input type="checkbox"/> 1   <input type="checkbox"/> 2   <input type="checkbox"/> 3   <input type="checkbox"/> 4 |          |





## Care & Case Management Manual – COCOS-MS

Communication, Coordination und Security for people with Multiple Sclerosis

### 3.3 Monitoring

Please document the current status of the action plan and implementation. If there is not enough space in the table, you can additionally use the supplementary sheet 'monitoring' (see appendix).

<sup>1</sup>Enter a value from 0 to 4 here to indicate satisfaction with the CCM actions, where 0 = 'very dissatisfied', 1 = 'dissatisfied', 2 = 'neither satisfied nor dissatisfied', 3 = 'satisfied' and 4 = 'very satisfied'; 99 = 'unknown'.

| Action | Initiated                | Continued                | Finished                 | Satisfaction <sup>1</sup> | Comment |
|--------|--------------------------|--------------------------|--------------------------|---------------------------|---------|
| 1.     | <input type="checkbox"/> | <input type="checkbox"/> | <input type="checkbox"/> |                           |         |
| 2.     | <input type="checkbox"/> | <input type="checkbox"/> | <input type="checkbox"/> |                           |         |
| 3.     | <input type="checkbox"/> | <input type="checkbox"/> | <input type="checkbox"/> |                           |         |
| 4.     | <input type="checkbox"/> | <input type="checkbox"/> | <input type="checkbox"/> |                           |         |
| 5.     | <input type="checkbox"/> | <input type="checkbox"/> | <input type="checkbox"/> |                           |         |
| 6.     | <input type="checkbox"/> | <input type="checkbox"/> | <input type="checkbox"/> |                           |         |
| 7.     | <input type="checkbox"/> | <input type="checkbox"/> | <input type="checkbox"/> |                           |         |
| 8.     | <input type="checkbox"/> | <input type="checkbox"/> | <input type="checkbox"/> |                           |         |
| 9.     | <input type="checkbox"/> | <input type="checkbox"/> | <input type="checkbox"/> |                           |         |



UNIKLINIK  
KÖLN

## Care & Case Management Manual – COCOS-MS

Communication, Coordination und Security for people with Multiple Sclerosis

### 3.4 telephone contacts und monitoring

*Documentation of the weekly telephone contacts. Please document content, topics and patient satisfaction.*

#### 3.4.1 First telephone contact und monitoring

*Please insert here "Telephone contact and monitoring" (see 1.4.1) from the appendix.*



UNIKLINIK  
KÖLN

## Care & Case Management Manual – COCOS-MS

Communication, Coordination und Security for people with Multiple Sclerosis

### 3.4.2 Second telephone contact und monitoring

*Please insert here "Telephone contact and monitoring" (see 4.1.2.1) from the appendix.*

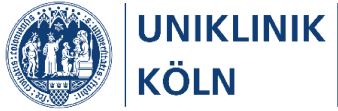

## Care & Case Management Manual – COCOS-MS

Communication, Coordination und Security for people with Multiple Sclerosis

### 3.4.3 Third telephone contact und monitoring

*Please insert here "Telephone contact and monitoring" (see 1.4.1) from the appendix.*



UNIKLINIK  
KÖLN

## Care & Case Management Manual – COCOS-MS

Communication, Coordination und Security for people with Multiple Sclerosis

### 4. Month 4: Brief assessment/process control (monitoring, update care plan)/telephone contacts

*Please enter here the brief assessment and „Telephone contact und monitoring“ (see chapter 2.1)*

*Please pay attention to the revision of the **care plan** (see chapter 1.3.2)!*



UNIKLINIK  
KÖLN

## Care & Case Management Manual – COCOS-MS

Communication, Coordination und Security for people with Multiple Sclerosis

### 5. Month 5: Brief assessment/process control (monitoring, update care plan)/telephone contacts

*Please enter here the brief assessment and „Telephone contact und monitoring“ (see chapter 2)*

*Please pay attention to the revision of the **care plan** (see chapter 1.3.2)!*



UNIKLINIK  
KÖLN

## Care & Case Management Manual – COCOS-MS

Communication, Coordination und Security for people with Multiple Sclerosis

6. Month 6: Follow-up assessment/evaluation of participation/process control (monitoring, update care plan)/telephone contacts

*Please enter here the follow-up assessment, table „evaluation of participation“, and „telephone contacts und monitoring“ (see chapter 3)*

*Please pay attention to the revision of the **care plan** (see chapter 1.3.2)!*



UNIKLINIK  
KÖLN

## Care & Case Management Manual – COCOS-MS

Communication, Coordination und Security for people with Multiple Sclerosis

7 Month 7: Brief assessment/process control (monitoring, update care plan) /telephone contacts

*Please enter here the brief assessment and „Telephone contact und monitoring“ (see chapter 2)*

*Please pay attention to the revision of the **care plan** (see chapter 1.3.2)!*





UNIKLINIK  
KÖLN

## Care & Case Management Manual – COCOS-MS

Communication, Coordination und Security for people with Multiple Sclerosis

8. Month 8: Follow-up assessment/evaluation of participation/process control (monitoring, update care plan) /telephone contacts

*Please enter here the follow-up assessment, table „evaluation of participation“, and „telephone contacts und monitoring“ (see chapter 3)*

*Please pay attention to the revision of the **care plan** (see chapter 1.3.2)!*

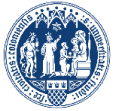

UNIKLINIK  
KÖLN

## Care & Case Management Manual – COCOS-MS

Communication, Coordination und Security for people with Multiple Sclerosis

### 9. Month 9: Brief assessment/process control (monitoring, update care plan)/telephone contacts

*Please enter here the brief assessment and „Telephone contact und monitoring“ (see chapter 2)*

*Please pay attention to the revision of the **care plan** (see chapter 1.3.2)!*



UNIKLINIK  
KÖLN

## Care & Case Management Manual – COCOS-MS

Communication, Coordination und Security for people with Multiple Sclerosis

### 10. Month 10: Brief assessment/process control (monitoring, update care plan) /telephone contacts

*Please enter here the brief assessment and „Telephone contact und monitoring“ (see chapter 2)*

*Please pay attention to the revision of the **care plan** (see chapter 1.3.2)!*



UNIKLINIK  
KÖLN

## Care & Case Management Manual – COCOS-MS

Communication, Coordination und Security for people with Multiple Sclerosis

11. Month 11: Follow-up assessment/evaluation of participation/process control (monitoring, update care plan) /telephone contacts

*Please enter here the follow-up assessment, table „evaluation of participation“, and „telephone contacts und monitoring“ (see chapter 3)*

*Please pay attention to the revision of the **care plan** (see chapter 1.3.2)!*



UNIKLINIK  
KÖLN

## Care & Case Management Manual – COCOS-MS

Communication, Coordination und Security for people with Multiple Sclerosis

12 Month 12: Brief assessment/process control (monitoring, update care plan) /telephone contacts/final assessment/evaluation participation/dispensation

### 12.1 Brief assessment

*Please enter here the brief assessment (see chapter 2.1)*

*Please pay attention to the revision of the **care plan** (see chapter 1.3.2)!*



**UNIKLINIK  
KÖLN**

## Care & Case Management Manual – COCOS-MS

Communication, Coordination und Security for people with Multiple Sclerosis

### 12.2 Monitoring

Please document the current status of the action plan and implementation. If there is not enough space in the table, you can additionally use the supplementary sheet 'monitoring' (see appendix).

<sup>1</sup>Enter a value from 0 to 4 here to indicate satisfaction with the CCM actions, where 0 = 'very dissatisfied', 1 = 'dissatisfied', 2 = 'neither satisfied nor dissatisfied', 3 = 'satisfied' and 4 = 'very satisfied'; 99 = 'unknown'.

| Action | Initiated                | Continued                | Finished                 | Satisfaction <sup>1</sup> | Comment |
|--------|--------------------------|--------------------------|--------------------------|---------------------------|---------|
| 1.     | <input type="checkbox"/> | <input type="checkbox"/> | <input type="checkbox"/> |                           |         |
| 2.     | <input type="checkbox"/> | <input type="checkbox"/> | <input type="checkbox"/> |                           |         |
| 3.     | <input type="checkbox"/> | <input type="checkbox"/> | <input type="checkbox"/> |                           |         |
| 4.     | <input type="checkbox"/> | <input type="checkbox"/> | <input type="checkbox"/> |                           |         |
| 5.     | <input type="checkbox"/> | <input type="checkbox"/> | <input type="checkbox"/> |                           |         |
| 6.     | <input type="checkbox"/> | <input type="checkbox"/> | <input type="checkbox"/> |                           |         |
| 7.     | <input type="checkbox"/> | <input type="checkbox"/> | <input type="checkbox"/> |                           |         |
| 8.     | <input type="checkbox"/> | <input type="checkbox"/> | <input type="checkbox"/> |                           |         |
| 9.     | <input type="checkbox"/> | <input type="checkbox"/> | <input type="checkbox"/> |                           |         |



UNIKLINIK  
KÖLN

## Care & Case Management Manual – COCOS-MS

Communication, Coordination und Security for people with Multiple Sclerosis

### 12.3 Telephone contacts und monitoring

#### 12.3.1 First telephone contact und monitoring

*Please insert here "Telephone contact and monitoring" (see 1.4.1) from the appendix.*



UNIKLINIK  
KÖLN

## Care & Case Management Manual – COCOS-MS

Communication, Coordination und Security for people with Multiple Sclerosis

### 12.3.2 Second telephone contact und monitoring

*Please insert here "Telephone contact and monitoring" (see 1.4.1) from the appendix.*





UNIKLINIK  
KÖLN

## Care & Case Management Manual – COCOS-MS

Communication, Coordination und Security for people with Multiple Sclerosis

### 12.3.3 Third telephone contact und monitoring

*Please insert here "Telephone contact and monitoring" (see 1.4.1) from the appendix.*



**UNIKLINIK  
KÖLN**

## Care & Case Management Manual – COCOS-MS

Communication, Coordination und Security for people with Multiple Sclerosis

### 12.4.1 Final assessment

*The codes used can be found in the legend.*

#### 12.4.1.1 Patient

**Date:** |\_\_|\_|\_|\_|\_|\_|\_|\_| **Duration:** \_\_\_\_\_

*Please enter here the assessment from the patient's perspective. His or her goals are to be written down with codes. The comments column can be used for details. The codes used can be found in the legend.*

*The assessment should be made according to the following criteria. If assessment is not possible, code "99" = unknown needs to be entered.*

#### Severity of the problem

*0 = none: Patient experiences the situation as unproblematic and not stressful.*

*1 = moderate: The situation causes limitations that are sometimes experienced as problematic and slightly stressful by the patient.*

*2 = significant: The situation causes limitations that are often experienced as problematic and clearly stressful by the patient.*

*3 = high: The situation causes limitations that are predominantly experienced as problematic and highly stressful by the patient.*

*4 = very high: The situation causes limitations that are consistently experienced as problematic and extremely stressful by the patient.*

#### Resources

*0 = none: Patient does not identify own abilities, strengths or capabilities within themselves and/or their environment that could contribute to problem-solving.*

*1 = marginal: Patient identifies individual abilities, strengths or capabilities within themselves and/or their environment which may still need to be developed and could contribute to problem-solving.*

*2 = sufficient: Patient identifies general abilities, strengths or capabilities within themselves and/or their environment which can contribute to problem-solving and can probably be accessed.*



UNIKLINIK  
KÖLN

## Care & Case Management Manual – COCOS-MS

Communication, Coordination und Security for people with Multiple Sclerosis

3 = good: *Patient recognizes many abilities, strengths or capabilities within themselves and/or their environment which can contribute to problem-solving and which - if not already been done - are highly likely to be accessed.*

4 = very good: *Patient recognizes a great number of abilities, strengths or capabilities within themselves and/or their environment which can make a specific contribution to problem-solving and can be used quickly.*

Need: *The Case Manager will assess the needs for an intervention which results from comparing and weighing the problem and resources, without determining them mathematically. This assessment can also be made throughout the follow-up assessment.*

0 = no need: *There is no need for an intervention as no problem has been identified or the problem can be solved by means of existing resources.*

1 = Need for monitoring: *There is a problem that can widely be overcome with existing resources. It should regularly be checked for changes as external support may be useful or necessary at times.*

2 = Need for action: *There is a problem that requires additional resources to be (re)developed in order to deal with it. External intervention is necessary.*

3 = Need for intervention: *There is a problem which basically requires resources to deal with it. External intervention is necessary, otherwise there is a high risk for the situation to worsen.*

4 = Crisis intervention: *Immediate intervention is required to prevent or respond to an escalation of the situation. The assessment must be discontinued and can only be continued once the situation has stabilized.*



**UNIKLINIK  
KÖLN**

## Care & Case Management Manual – COCOS-MS

Communication, Coordination und Security for people with Multiple Sclerosis

### Section health

<sup>1</sup>Enter a value from 0 to 4 to indicate the *severity of the problem*, where 0 = ‚none‘, 1 = ‚moderate‘, 2 = ‚significant‘, 3 = ‚high‘ and 4 = ‚very high‘; 99 = ‚unknown‘.

<sup>2</sup>Enter a value from 0 to 4 to indicate the *manifestation of the resource*, where 0 = ‚none‘, 1 = ‚marginal‘, 2 = ‚sufficient‘, 3 = ‚good‘ and 4 = ‚very good‘; 99 = ‚unknown‘.

<sup>3</sup>Enter a value from 0 to 4 to indicate the *need*, where 0 = ‚no need‘, 1 = ‚need for monitoring‘, 2 = ‚need for action‘, 3 = ‚need for intervention‘ and 4 = ‚Crisis intervention‘; 99 = ‚unknown‘.

| Physical health patient (brief) |                      |                       |                   |      |         |
|---------------------------------|----------------------|-----------------------|-------------------|------|---------|
| Content                         | Problem <sup>1</sup> | Resource <sup>2</sup> | Need <sup>3</sup> | Goal | Comment |
| BKK 01 of MS (physical)         |                      |                       |                   |      |         |
| BKK 02 Other physical diseases  |                      |                       |                   |      |         |
| BKK 03 Medication               |                      |                       |                   |      |         |

| Physical health patient (long)                                |                      |                       |                   |      |         |
|---------------------------------------------------------------|----------------------|-----------------------|-------------------|------|---------|
| Content                                                       | Problem <sup>1</sup> | Resource <sup>2</sup> | Need <sup>3</sup> | Goal | Comment |
| BGK 01 Spasticity, paralysis, numbness, misperceptions (etc.) |                      |                       |                   |      |         |
| BGK 02 Pain                                                   |                      |                       |                   |      |         |
| BGK 03 Coordination, Fine motor skills                        |                      |                       |                   |      |         |
| BGK 04 Swallowing, speech and language disorders              |                      |                       |                   |      |         |



**UNIKLINIK  
KÖLN**

## Care & Case Management Manual – COCOS-MS

Communication, Coordination und Security for people with Multiple Sclerosis

| Physical health patient (long)                                                                       |                      |                       |                   |      |         |
|------------------------------------------------------------------------------------------------------|----------------------|-----------------------|-------------------|------|---------|
| Content                                                                                              | Problem <sup>1</sup> | Resource <sup>2</sup> | Need <sup>3</sup> | Goal | Comment |
| <b>BGK 05</b> Vision (including double vision etc.)...                                               |                      |                       |                   |      |         |
| <b>BGK 06</b> Hearing, smell, taste                                                                  |                      |                       |                   |      |         |
| <b>BGK 07</b> Disease progression (MS)                                                               |                      |                       |                   |      |         |
| <b>BGK 08</b> Difficulty breathing                                                                   |                      |                       |                   |      |         |
| <b>BGK 09</b> Skin (including wounds)                                                                |                      |                       |                   |      |         |
| <b>BGK 10</b> Urogenital tract (urinary retention, incontinence, menstruation, erectile dysfunction) |                      |                       |                   |      |         |
| <b>BGK 11</b> Gastrointestinal tract (nausea, vomiting, constipation, fecal incontinence)            |                      |                       |                   |      |         |
| <b>BGK 12</b> other internal diseases (cardiovascular, diabetes, hypertension, lipometabolism)       |                      |                       |                   |      |         |
| <b>BGK 13</b> Weight                                                                                 |                      |                       |                   |      |         |
| <b>BGK 14</b> Access to routine health screenings                                                    |                      |                       |                   |      |         |
| <b>BGK 15</b> Dealing with immunotherapeutic agents                                                  |                      |                       |                   |      |         |
| <b>BGK 16</b> Dealing with other medication                                                          |                      |                       |                   |      |         |



**UNIKLINIK  
KÖLN**

## Care & Case Management Manual – COCOS-MS

Communication, Coordination und Security for people with Multiple Sclerosis

| Mental health patient (brief) |                      |                       |                   |      |         |
|-------------------------------|----------------------|-----------------------|-------------------|------|---------|
| Content                       | Problem <sup>1</sup> | Resource <sup>2</sup> | Need <sup>3</sup> | Goal | Comment |
| BPK 01 Mental situation       |                      |                       |                   |      |         |

| Mental health patient (long)                    |                      |                       |                   |      |         |
|-------------------------------------------------|----------------------|-----------------------|-------------------|------|---------|
| Content                                         | Problem <sup>1</sup> | Resource <sup>2</sup> | Need <sup>3</sup> | Goal | Comment |
| BGP 01 Dealing with stress/stressful situations |                      |                       |                   |      |         |
| BGP 02 Concentration                            |                      |                       |                   |      |         |
| BGP 03 Cognition                                |                      |                       |                   |      |         |
| BGP 04 Disorientation                           |                      |                       |                   |      |         |
| BGP 05 Personality changes                      |                      |                       |                   |      |         |
| BGP 06 Fatigue                                  |                      |                       |                   |      |         |
| BGP 07 Depression                               |                      |                       |                   |      |         |
| BGP 08 Depressive mood                          |                      |                       |                   |      |         |
| BGP 09 Suicidal thoughts                        |                      |                       |                   |      |         |
| BGP 10 Anxiety/inner restlessness               |                      |                       |                   |      |         |
| BGP 11 Anxiety/panic attacks                    |                      |                       |                   |      |         |



**UNIKLINIK  
KÖLN**

## Care & Case Management Manual – COCOS-MS

Communication, Coordination und Security for people with Multiple Sclerosis

| Mental health patient (long)                 |                      |                       |                   |      |         |
|----------------------------------------------|----------------------|-----------------------|-------------------|------|---------|
| Content                                      | Problem <sup>1</sup> | Resource <sup>2</sup> | Need <sup>3</sup> | Goal | Comment |
| <b>BGP 12</b> Grief                          |                      |                       |                   |      |         |
| <b>BGP 13</b> Being able to express emotions |                      |                       |                   |      |         |
| <b>BGP 14</b> Biographical disruption        |                      |                       |                   |      |         |
| <b>BGP 15</b> Autonomy                       |                      |                       |                   |      |         |
| <b>BGP 16</b> Smoking                        |                      |                       |                   |      |         |
| <b>BGP 17</b> Alcohol and drug consumption   |                      |                       |                   |      |         |



**UNIKLINIK  
KÖLN**

## Care & Case Management Manual – COCOS-MS

Communication, Coordination und Security for people with Multiple Sclerosis

### Section autarky

<sup>1</sup>Enter a value from 0 to 4 to indicate the *severity of the problem*, where 0 = ‚none‘, 1 = ‚moderate‘, 2 = ‚significant‘, 3 = ‚high‘ and 4 = ‚very high‘; 99 = ‚unknown‘.

<sup>2</sup>Enter a value from 0 to 4 to indicate the *manifestation of the resource*, where 0 = ‚none‘, 1 = ‚marginal‘, 2 = ‚sufficient‘, 3 = ‚good‘ and 4 = ‚very good‘; 99 = ‚unknown‘.

<sup>3</sup>Enter a value from 0 to 4 to indicate the *need*, where 0 = ‚no need‘, 1 = ‚need for monitoring‘, 2 = ‚need for action‘, 3 = ‚need for intervention‘ and 4 = ‚Crisis intervention‘; 99 = ‚unknown‘.

| Self-sufficiency patient                  |                      |                       |                   |      |         |
|-------------------------------------------|----------------------|-----------------------|-------------------|------|---------|
| Content                                   | Problem <sup>1</sup> | Resource <sup>2</sup> | Need <sup>3</sup> | Goal | Comment |
| BSV 01 Satisfaction with outer appearance |                      |                       |                   |      |         |
| BSV 02 Washing upper body                 |                      |                       |                   |      |         |
| BSV 03 Washing lower body                 |                      |                       |                   |      |         |
| BSV 04 Incontinence care                  |                      |                       |                   |      |         |
| BSV 05 Showering/taking a bath            |                      |                       |                   |      |         |
| BSV 06 Dental care                        |                      |                       |                   |      |         |
| BSV 07 Hair/nail care                     |                      |                       |                   |      |         |
| BSV 08 Putting on clothes incl. shoes     |                      |                       |                   |      |         |
| BSV 09 Cleaning the apartment             |                      |                       |                   |      |         |





**UNIKLINIK  
KÖLN**

## Care & Case Management Manual – COCOS-MS

Communication, Coordination und Security for people with Multiple Sclerosis

| Self-sufficiency patient                   |                      |                       |                   |      |         |
|--------------------------------------------|----------------------|-----------------------|-------------------|------|---------|
| Content                                    | Problem <sup>1</sup> | Resource <sup>2</sup> | Need <sup>3</sup> | Goal | Comment |
| BSV 10 Eating independently                |                      |                       |                   |      |         |
| BSV 11 Drinking independently              |                      |                       |                   |      |         |
| BSV 12 Preparing food                      |                      |                       |                   |      |         |
| BSV 13 Shopping                            |                      |                       |                   |      |         |
| BSV 14 Preparing medication                |                      |                       |                   |      |         |
| BSV 15 Procurement of medication           |                      |                       |                   |      |         |
| BSV 16 Own organization of daily structure |                      |                       |                   |      |         |
| BSV 17 Coordinating appointments           |                      |                       |                   |      |         |

| Medical, nursing und therapeutic care patient |                      |                       |                   |      |         |
|-----------------------------------------------|----------------------|-----------------------|-------------------|------|---------|
| Content                                       | Problem <sup>1</sup> | Resource <sup>2</sup> | Need <sup>3</sup> | Goal | Comment |
| BMP 01 General medical care                   |                      |                       |                   |      |         |
| BMP 02 Neurological care                      |                      |                       |                   |      |         |
| BMP 03 Other specialist care                  |                      |                       |                   |      |         |
| BMP 04 Nursing care                           |                      |                       |                   |      |         |



**UNIKLINIK  
KÖLN**

## Care & Case Management Manual – COCOS-MS

Communication, Coordination und Security for people with Multiple Sclerosis

| Medical, nursing und therapeutic care patient                                  |                      |                       |                   |      |         |
|--------------------------------------------------------------------------------|----------------------|-----------------------|-------------------|------|---------|
| Content                                                                        | Problem <sup>1</sup> | Resource <sup>2</sup> | Need <sup>3</sup> | Goal | Comment |
| <b>BMP 05</b> Physiotherapy                                                    |                      |                       |                   |      |         |
| <b>BMP 06</b> Occupational therapy                                             |                      |                       |                   |      |         |
| <b>BMP 07</b> Speech therapy                                                   |                      |                       |                   |      |         |
| <b>BMP 08</b> Psychotherapy                                                    |                      |                       |                   |      |         |
| <b>BMP 09</b> Information about MS<br>(Follow-up, therapy, self-help services) |                      |                       |                   |      |         |

| Mobility patient                                                                          |                      |                       |                   |      |         |
|-------------------------------------------------------------------------------------------|----------------------|-----------------------|-------------------|------|---------|
| Content                                                                                   | Problem <sup>1</sup> | Resource <sup>2</sup> | Need <sup>3</sup> | Goal | Comment |
| <b>BMO 01</b> Walking within the apartment                                                |                      |                       |                   |      |         |
| <b>BMO 02</b> Walking outside the apartment                                               |                      |                       |                   |      |         |
| <b>BMO 03</b> Going up stairs                                                             |                      |                       |                   |      |         |
| <b>BMO 04</b> Standing securely                                                           |                      |                       |                   |      |         |
| <b>BMO 05</b> Access to individual means of transport (car, bicycle, scooter, motorcycle) |                      |                       |                   |      |         |



**UNIKLINIK  
KÖLN**

## Care & Case Management Manual – COCOS-MS

Communication, Coordination und Security for people with Multiple Sclerosis

| Mobility patient                                   |                      |                       |                   |      |         |
|----------------------------------------------------|----------------------|-----------------------|-------------------|------|---------|
| Content                                            | Problem <sup>1</sup> | Resource <sup>2</sup> | Need <sup>3</sup> | Goal | Comment |
| <b>BMO 06</b> Use of individual means of transport |                      |                       |                   |      |         |
| <b>BMO 07</b> Access to public transport           |                      |                       |                   |      |         |
| <b>BMO 08</b> Use of public transport              |                      |                       |                   |      |         |

| Living patient                                             |                      |                       |                   |      |         |
|------------------------------------------------------------|----------------------|-----------------------|-------------------|------|---------|
| Content                                                    | Problem <sup>1</sup> | Resource <sup>2</sup> | Need <sup>3</sup> | Goal | Comment |
| <b>BWO 01</b> Place of residence                           |                      |                       |                   |      |         |
| <b>BWO 02</b> Type of apartment / house / apartment / room |                      |                       |                   |      |         |
| <b>BWO 03</b> Access to apartment / house etc.             |                      |                       |                   |      |         |
| <b>BWO 04</b> Accessibility living and sleeping rooms      |                      |                       |                   |      |         |
| <b>BWO 05</b> Accessibility bathroom                       |                      |                       |                   |      |         |
| <b>BWO 06</b> Accessibility kitchen and other premises     |                      |                       |                   |      |         |
| <b>BWO 07</b> Accessibility balcony / terrace / garden     |                      |                       |                   |      |         |



**UNIKLINIK  
KÖLN**

## Care & Case Management Manual – COCOS-MS

Communication, Coordination und Security for people with Multiple Sclerosis

| Work and employment patient                               |                      |                       |                   |      |         |
|-----------------------------------------------------------|----------------------|-----------------------|-------------------|------|---------|
| Content                                                   | Problem <sup>1</sup> | Resource <sup>2</sup> | Need <sup>3</sup> | Goal | Comment |
| <b>BAB 01</b> Employability                               |                      |                       |                   |      |         |
| <b>BAB 02</b> Work ability                                |                      |                       |                   |      |         |
| <b>BAB 03</b> Working hours                               |                      |                       |                   |      |         |
| <b>BAB 04</b> Workplace arrangement                       |                      |                       |                   |      |         |
| <b>BAB 05</b> Meaningful activities (e.g. volunteer work) |                      |                       |                   |      |         |

| Financial and social law situation patient                    |                      |                       |                   |      |         |
|---------------------------------------------------------------|----------------------|-----------------------|-------------------|------|---------|
| Content                                                       | Problem <sup>1</sup> | Resource <sup>2</sup> | Need <sup>3</sup> | Goal | Comment |
| <b>BFS 01</b> Financial security of subsistence               |                      |                       |                   |      |         |
| <b>BFS 02</b> Financial security of care                      |                      |                       |                   |      |         |
| <b>BFS 03</b> Financing of housing adaptation                 |                      |                       |                   |      |         |
| <b>BFS 04</b> Financing of medical aids                       |                      |                       |                   |      |         |
| <b>BFS 05</b> Social insurance agency (e.g. health insurance) |                      |                       |                   |      |         |
| <b>BFS 06</b> Debts                                           |                      |                       |                   |      |         |
| <b>BFS 07</b> Old-age provision                               |                      |                       |                   |      |         |



**UNIKLINIK  
KÖLN**

## Care & Case Management Manual – COCOS-MS

Communication, Coordination und Security for people with Multiple Sclerosis

| Financial and social law situation patient                       |                      |                       |                   |      |         |
|------------------------------------------------------------------|----------------------|-----------------------|-------------------|------|---------|
| Content                                                          | Problem <sup>1</sup> | Resource <sup>2</sup> | Need <sup>3</sup> | Goal | Comment |
| <b>BFS 08</b> Being able to represent legal interests themselves |                      |                       |                   |      |         |
| <b>BFS 09</b> Recognition of (severe) disability                 |                      |                       |                   |      |         |
| <b>BFS 10</b> Other social law needs (e.g. custody)              |                      |                       |                   |      |         |



## Care & Case Management Manual – COCOS-MS

Communication, Coordination und Security for people with Multiple Sclerosis

### Section social situation and participation patient

<sup>1</sup>Enter a value from 0 to 4 to indicate the *severity of the problem*, where 0 = ,none', 1 = ,moderate', 2 = ,significant', 3 = ,high' and 4 = ,very high'; 99 = ,unknown'.

<sup>2</sup>Enter a value from 0 to 4 to indicate the *manifestation of the resource*, where 0 = ,none', 1 = ,marginal', 2 = ,sufficient', 3 = ,good' and 4 = ,very good'; 99 = ,unknown'.

<sup>3</sup>Enter a value from 0 to 4 to indicate the *need*, where 0 = ,no need', 1 = ,need for monitoring', 2 = ,need for action', 3 = ,need for intervention' and 4 = ,Crisis intervention'; 99 = ,unknown'.

| Social Situation und participation patient (brief) |                      |                       |                   |      |         |
|----------------------------------------------------|----------------------|-----------------------|-------------------|------|---------|
| Content                                            | Problem <sup>1</sup> | Resource <sup>2</sup> | Need <sup>3</sup> | Goal | Comment |
| BSP 01 Involvement of family and friends           |                      |                       |                   |      |         |
| BSP 02 Role as e.g. partner, child, parent, friend |                      |                       |                   |      |         |
| BSP 03 Pursuing hobbies/interests                  |                      |                       |                   |      |         |
| BSP 04 Cultural/social/political participation     |                      |                       |                   |      |         |
| BSP 05 Spiritual/pastoral support                  |                      |                       |                   |      |         |

| Communication patient                    |                      |                       |                   |      |         |
|------------------------------------------|----------------------|-----------------------|-------------------|------|---------|
| Content                                  | Problem <sup>1</sup> | Resource <sup>2</sup> | Need <sup>3</sup> | Goal | Comment |
| BKO 01 Use of computer/tablet/smartphone |                      |                       |                   |      |         |
| BKO 02 Use of mobile/telephone           |                      |                       |                   |      |         |



**UNIKLINIK  
KÖLN**

## Care & Case Management Manual – COCOS-MS

Communication, Coordination und Security for people with Multiple Sclerosis

| Communication patient                                                        |                      |                       |                   |      |         |
|------------------------------------------------------------------------------|----------------------|-----------------------|-------------------|------|---------|
| Content                                                                      | Problem <sup>1</sup> | Resource <sup>2</sup> | Need <sup>3</sup> | Goal | Comment |
| <b>BKO 03</b> Access to information media (internet, television, newspapers) |                      |                       |                   |      |         |
| <b>BKO 04</b> Writing, reading, listening                                    |                      |                       |                   |      |         |

| Social inclusion patient                                  |                      |                       |                   |      |         |
|-----------------------------------------------------------|----------------------|-----------------------|-------------------|------|---------|
| Content                                                   | Problem <sup>1</sup> | Resource <sup>2</sup> | Need <sup>3</sup> | Goal | Comment |
| <b>BSE 01</b> Feeling like they belong                    |                      |                       |                   |      |         |
| <b>BSE 02</b> Concern for family/relatives                |                      |                       |                   |      |         |
| <b>BSE 03</b> Maintaining friendships                     |                      |                       |                   |      |         |
| <b>BSE 04</b> Participation in events with family/friends |                      |                       |                   |      |         |
| <b>BSE 05</b> Being a parent, son, daughter, friend       |                      |                       |                   |      |         |
| <b>BSE 06</b> Being a partner                             |                      |                       |                   |      |         |
| <b>BSE 07</b> Love and sex life                           |                      |                       |                   |      |         |
| <b>BSE 08</b> Family planning, access to contraceptives   |                      |                       |                   |      |         |



**UNIKLINIK  
KÖLN**

## Care & Case Management Manual – COCOS-MS

Communication, Coordination und Security for people with Multiple Sclerosis

| Social and political participation patient                                            |                      |                       |                   |      |         |
|---------------------------------------------------------------------------------------|----------------------|-----------------------|-------------------|------|---------|
| Content                                                                               | Problem <sup>1</sup> | Resource <sup>2</sup> | Need <sup>3</sup> | Goal | Comment |
| <b>BGP 01</b> Participation in neighborhood/club life                                 |                      |                       |                   |      |         |
| <b>BGP 02</b> Access to educational opportunities (e.g. adult education center “VHS”) |                      |                       |                   |      |         |
| <b>BGP 03</b> Political participation (right to vote, demonstrations)                 |                      |                       |                   |      |         |

| Recreational activities patient                                  |                      |                       |                   |      |         |
|------------------------------------------------------------------|----------------------|-----------------------|-------------------|------|---------|
| Content                                                          | Problem <sup>1</sup> | Resource <sup>2</sup> | Need <sup>3</sup> | Goal | Comment |
| <b>BFG 01</b> Sufficient leisure time                            |                      |                       |                   |      |         |
| <b>BFG 02</b> Pursuing hobbies/interests                         |                      |                       |                   |      |         |
| <b>BFG 03</b> Doing sports                                       |                      |                       |                   |      |         |
| <b>BFG 04</b> Use of cultural events (cinema, theatre, concerts) |                      |                       |                   |      |         |
| <b>BFG 05</b> Going on vacation                                  |                      |                       |                   |      |         |

| Religion and spirituality patient                          |                      |                       |                   |      |         |
|------------------------------------------------------------|----------------------|-----------------------|-------------------|------|---------|
| Content                                                    | Problem <sup>1</sup> | Resource <sup>2</sup> | Need <sup>3</sup> | Goal | Comment |
| <b>BRS 01</b> Opportunity to express religion/spirituality |                      |                       |                   |      |         |





**UNIKLINIK  
KÖLN**

## Care & Case Management Manual – COCOS-MS

Communication, Coordination und Security for people with Multiple Sclerosis

| Religion and spirituality patient              |                      |                       |                   |      |         |
|------------------------------------------------|----------------------|-----------------------|-------------------|------|---------|
| Content                                        | Problem <sup>1</sup> | Resource <sup>2</sup> | Need <sup>3</sup> | Goal | Comment |
| BRS 02 Contact with spiritual/pastoral support |                      |                       |                   |      |         |
| BRS 03 Finding own spirituality/religion       |                      |                       |                   |      |         |

Comments:





UNIKLINIK  
KÖLN

## Care & Case Management Manual – COCOS-MS

Communication, Coordination und Security for people with Multiple Sclerosis

4 = very good: Caregiver recognizes a great number of abilities, strengths or capabilities within themselves and/or their environment which can make a specific contribution to problem-solving and can be used quickly.

*Need:* The Case Manager will assess the needs for an intervention which results from comparing and weighing the problem and resources, without determining them mathematically. This assessment can also be made throughout the follow-up assessment.

0 = no need: There is no need for an intervention as no problem has been identified or the problem can be solved by means of existing resources.

1 = need for monitoring: There is a problem that can widely be overcome with existing resources. It should regularly be checked for changes as external support may be useful or necessary at times.

2 = need for action: There is a problem that requires additional resources to be (re)developed in order to deal with it. External intervention is necessary.

3 = need for intervention: There is a problem which basically requires resources to deal with it. External intervention is necessary, otherwise there is a high risk for the situation to worsen.

4 = crisis intervention: Immediate intervention is required to prevent or respond to an escalation of the situation. The assessment must be discontinued and can only be continued once the situation has stabilized.

<sup>1</sup>Enter a value from 0 to 4 to indicate the *severity of the problem*, where 0 = ,none', 1 = ,moderate', 2 = ,significant', 3 = ,high' and 4 = ,very high'; 99 = ,unknown'.

<sup>2</sup>Enter a value from 0 to 4 to indicate the *manifestation of the resource*, where 0 = ,none', 1 = ,marginal', 2 = ,sufficient', 3 = ,good' and 4 = ,very good'; 99 = ,unknown'.

<sup>3</sup>Enter a value from 0 to 4 to indicate the *need*, where 0 = ,no need', 1 = ,need for monitoring', 2 = ,need for action', 3 = ,need for intervention' and 4 = ,Crisis intervention'; 99 = ,unknown'.



**UNIKLINIK  
KÖLN**

## Care & Case Management Manual – COCOS-MS

Communication, Coordination und Security for people with Multiple Sclerosis

| Physical health caregiver          |                      |                       |                   |      |         |
|------------------------------------|----------------------|-----------------------|-------------------|------|---------|
| Content                            | Problem <sup>1</sup> | Resource <sup>2</sup> | Need <sup>3</sup> | Goal | Comment |
| BKB 01 Physical diseases           |                      |                       |                   |      |         |
| BKB 02 Physical burden due to care |                      |                       |                   |      |         |

| Mental health caregiver              |                      |                       |                   |      |         |
|--------------------------------------|----------------------|-----------------------|-------------------|------|---------|
| Content                              | Problem <sup>1</sup> | Resource <sup>2</sup> | Need <sup>3</sup> | Goal | Comment |
| BPB 01 Emotional burden as caregiver |                      |                       |                   |      |         |
| BPB 02 Mental diseases               |                      |                       |                   |      |         |

| Autarky caregiver                              |                      |                       |                   |      |         |
|------------------------------------------------|----------------------|-----------------------|-------------------|------|---------|
| Content                                        | Problem <sup>1</sup> | Resource <sup>2</sup> | Need <sup>3</sup> | Goal | Comment |
| BBS 01 Housekeeping (shopping, cleaning, etc.) |                      |                       |                   |      |         |
| BBS 02 Organization (e.g. appointments)        |                      |                       |                   |      |         |
| BBS 03 Mobility                                |                      |                       |                   |      |         |
| BBS 04 Living                                  |                      |                       |                   |      |         |
| BBS 05 Work                                    |                      |                       |                   |      |         |
| BBS 06 Financial protection                    |                      |                       |                   |      |         |



**UNIKLINIK  
KÖLN**

## Care & Case Management Manual – COCOS-MS

Communication, Coordination und Security for people with Multiple Sclerosis

| Social involvement and participation Caregiver            |                      |                       |                   |      |         |
|-----------------------------------------------------------|----------------------|-----------------------|-------------------|------|---------|
| Content                                                   | Problem <sup>1</sup> | Resource <sup>2</sup> | Need <sup>3</sup> | Goal | Comment |
| <b>BBE 01</b> Family involvement                          |                      |                       |                   |      |         |
| <b>BBE 02</b> Maintaining friendships                     |                      |                       |                   |      |         |
| <b>BBE 03</b> Role as e.g. partner, child, parent, friend |                      |                       |                   |      |         |
| <b>BBE 04</b> Pursuing hobbies/interests                  |                      |                       |                   |      |         |
| <b>BBE 05</b> Cultural/social/political participation     |                      |                       |                   |      |         |
| <b>BBE 06</b> Spiritual/pastoral support                  |                      |                       |                   |      |         |

Comments:



**UNIKLINIK  
KÖLN**

## Care & Case Management Manual – COCOS-MS

Communication, Coordination und Security for people with Multiple Sclerosis

### 12.5 Evaluation of participation

Please let the patient estimate to what extent his/her participation has been realized.

| To what extent is this statement true?            | 0 = very little   1 = little   2 = moderate   3 = much   4 = very much                                                                         | Comments |
|---------------------------------------------------|------------------------------------------------------------------------------------------------------------------------------------------------|----------|
| My wishes have been realized.                     | <input type="checkbox"/> 0   <input type="checkbox"/> 1   <input type="checkbox"/> 2   <input type="checkbox"/> 3   <input type="checkbox"/> 4 |          |
| I choose the service providers.                   | <input type="checkbox"/> 0   <input type="checkbox"/> 1   <input type="checkbox"/> 2   <input type="checkbox"/> 3   <input type="checkbox"/> 4 |          |
| I felt relieved by the implementation of actions. | <input type="checkbox"/> 0   <input type="checkbox"/> 1   <input type="checkbox"/> 2   <input type="checkbox"/> 3   <input type="checkbox"/> 4 |          |
| I choose the actions.                             | <input type="checkbox"/> 0   <input type="checkbox"/> 1   <input type="checkbox"/> 2   <input type="checkbox"/> 3   <input type="checkbox"/> 4 |          |
| I have a say.                                     | <input type="checkbox"/> 0   <input type="checkbox"/> 1   <input type="checkbox"/> 2   <input type="checkbox"/> 3   <input type="checkbox"/> 4 |          |
| My values and ideas are taken into account.       | <input type="checkbox"/> 0   <input type="checkbox"/> 1   <input type="checkbox"/> 2   <input type="checkbox"/> 3   <input type="checkbox"/> 4 |          |
| The level of support I receive is appropriate.    | <input type="checkbox"/> 0   <input type="checkbox"/> 1   <input type="checkbox"/> 2   <input type="checkbox"/> 3   <input type="checkbox"/> 4 |          |
| I live a self-determined life.                    | <input type="checkbox"/> 0   <input type="checkbox"/> 1   <input type="checkbox"/> 2   <input type="checkbox"/> 3   <input type="checkbox"/> 4 |          |
| I feel relieved.                                  | <input type="checkbox"/> 0   <input type="checkbox"/> 1   <input type="checkbox"/> 2   <input type="checkbox"/> 3   <input type="checkbox"/> 4 |          |



UNIKLINIK  
KÖLN

## Care & Case Management Manual – COCOS-MS

Communication, Coordination und Security for people with Multiple Sclerosis

Comments



UNIKLINIK  
KÖLN

## Care & Case Management Manual – COCOS-MS

Communication, Coordination und Security for people with Multiple Sclerosis

### 12.6 Reasons for deviation from goal achievement

Please enter here, using the numbering of the goals listed in 3.3, what has led to deviations from the respective goal, if this was the case. Multiple answers are possible. Document this for goals that have not been achieved only (goals achieved are documented in 5.2.). If there is not enough space in the table, the supplementary sheet "Deviation from goal achievement" (see appendix) can additionally be used.

|                                                  |                          |                          |                          |                          |                          |                          |                          |                          |                          |                          |
|--------------------------------------------------|--------------------------|--------------------------|--------------------------|--------------------------|--------------------------|--------------------------|--------------------------|--------------------------|--------------------------|--------------------------|
| Goal code:                                       |                          |                          |                          |                          |                          |                          |                          |                          |                          |                          |
| Health condition changed / declined              | <input type="checkbox"/> | <input type="checkbox"/> | <input type="checkbox"/> | <input type="checkbox"/> | <input type="checkbox"/> | <input type="checkbox"/> | <input type="checkbox"/> | <input type="checkbox"/> | <input type="checkbox"/> | <input type="checkbox"/> |
| Individual action not delivered well             | <input type="checkbox"/> | <input type="checkbox"/> | <input type="checkbox"/> | <input type="checkbox"/> | <input type="checkbox"/> | <input type="checkbox"/> | <input type="checkbox"/> | <input type="checkbox"/> | <input type="checkbox"/> | <input type="checkbox"/> |
| Cooperation problems with partners               | <input type="checkbox"/> | <input type="checkbox"/> | <input type="checkbox"/> | <input type="checkbox"/> | <input type="checkbox"/> | <input type="checkbox"/> | <input type="checkbox"/> | <input type="checkbox"/> | <input type="checkbox"/> | <input type="checkbox"/> |
| Financing problems                               | <input type="checkbox"/> | <input type="checkbox"/> | <input type="checkbox"/> | <input type="checkbox"/> | <input type="checkbox"/> | <input type="checkbox"/> | <input type="checkbox"/> | <input type="checkbox"/> | <input type="checkbox"/> | <input type="checkbox"/> |
| Individual action not available                  | <input type="checkbox"/> | <input type="checkbox"/> | <input type="checkbox"/> | <input type="checkbox"/> | <input type="checkbox"/> | <input type="checkbox"/> | <input type="checkbox"/> | <input type="checkbox"/> | <input type="checkbox"/> | <input type="checkbox"/> |
| Individual action not accepted                   | <input type="checkbox"/> | <input type="checkbox"/> | <input type="checkbox"/> | <input type="checkbox"/> | <input type="checkbox"/> | <input type="checkbox"/> | <input type="checkbox"/> | <input type="checkbox"/> | <input type="checkbox"/> | <input type="checkbox"/> |
| Consultation / Care & Case Management terminated | <input type="checkbox"/> | <input type="checkbox"/> | <input type="checkbox"/> | <input type="checkbox"/> | <input type="checkbox"/> | <input type="checkbox"/> | <input type="checkbox"/> | <input type="checkbox"/> | <input type="checkbox"/> | <input type="checkbox"/> |
| CCM competencies were not sufficient             | <input type="checkbox"/> | <input type="checkbox"/> | <input type="checkbox"/> | <input type="checkbox"/> | <input type="checkbox"/> | <input type="checkbox"/> | <input type="checkbox"/> | <input type="checkbox"/> | <input type="checkbox"/> | <input type="checkbox"/> |
| Other (text entry)                               |                          |                          |                          |                          |                          |                          |                          |                          |                          |                          |
| Not specified                                    | <input type="checkbox"/> | <input type="checkbox"/> | <input type="checkbox"/> | <input type="checkbox"/> | <input type="checkbox"/> | <input type="checkbox"/> | <input type="checkbox"/> | <input type="checkbox"/> | <input type="checkbox"/> | <input type="checkbox"/> |





UNIKLINIK  
KÖLN

## Care & Case Management Manual – COCOS-MS

Communication, Coordination und Security for people with Multiple Sclerosis

Comments:



**UNIKLINIK  
KÖLN**

## Care & Case Management Manual – COCOS-MS

Communication, Coordination und Security for people with Multiple Sclerosis

### 12.7 Dispensation

Patient and caregiver will be told that the CCM study is finished by the end of 12 months, even though not all goals may have been achieved. In order to ensure sustainable support, a list of the lasting cooperation partners will be created in 12.7.1.

#### 12.7.1 Lasting cooperation partner

*Please enter here the cooperation partners for the patient and caregiver remaining after the end of the study CCM. A copy of the list will be given to the patient and caregiver.*

| Cooperation partner | Specific person | Contact information | Order / information | Comment |
|---------------------|-----------------|---------------------|---------------------|---------|
|                     |                 |                     |                     |         |
|                     |                 |                     |                     |         |
|                     |                 |                     |                     |         |
|                     |                 |                     |                     |         |

**UNIKLINIK  
KÖLN**

## Care & Case Management Manual – COCOS-MS

Communication, Coordination und Security for people with Multiple Sclerosis

| Cooperation partner | Specific person | Contact information | Order / information | Comment |
|---------------------|-----------------|---------------------|---------------------|---------|
|                     |                 |                     |                     |         |
|                     |                 |                     |                     |         |
|                     |                 |                     |                     |         |
|                     |                 |                     |                     |         |
|                     |                 |                     |                     |         |
|                     |                 |                     |                     |         |
