# Supplementary material for: Communication, Coordination, and Security for People with Multiple Sclerosis (COCOS-MS): a randomised phase II clinical trial protocol
Source: HighWire-hosted journal article supplement (doi:10.1136/bmjopen-2021-049300), 2022-01-01
Supplement: bmjopen-2021-049300supp006_data_supplement.pdf [file bmjopen-2021-049300supp006_data_supplement.pdf]

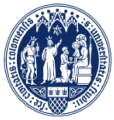

**UNIKLINIK  
KÖLN**

Zentrum für  
Palliativmedizin

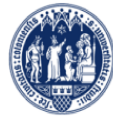

**UNIKLINIK  
KÖLN**

Klinik und Poliklinik  
für Neurologie

Compliance form for participation in the study „**Communication, Coordination und Security for People with Multiple Sclerosis (COCOS-MS)**“

**Patient ID:**

**Date:**   -   -      
D D M M Y Y Y Y

| <b>Assessment</b><br>(please encircle) | <b>1</b><br>(Baseline) | <b>2</b> | <b>3</b> | <b>4</b> | <b>5</b> | <b>6</b><br>(Follow-Up) |
|----------------------------------------|------------------------|----------|----------|----------|----------|-------------------------|
|----------------------------------------|------------------------|----------|----------|----------|----------|-------------------------|

**Questions need to be answered in order, unless indicated otherwise.**

**Characteristics of assessment**

|                                                                                                                            | <b>yes</b>            | <b>no</b>             | <b>partially</b>      |
|----------------------------------------------------------------------------------------------------------------------------|-----------------------|-----------------------|-----------------------|
| 1) Questionnaires were completed by the patient themselves (self assessment).                                              | <input type="radio"/> | <input type="radio"/> | <input type="radio"/> |
| • HALEMS                                                                                                                   | <input type="radio"/> | <input type="radio"/> | <input type="radio"/> |
| • IPOS (Neuro-S8)                                                                                                          | <input type="radio"/> | <input type="radio"/> | <input type="radio"/> |
| • HADS                                                                                                                     | <input type="radio"/> | <input type="radio"/> | <input type="radio"/> |
| • Cost booklet                                                                                                             | <input type="radio"/> | <input type="radio"/> | <input type="radio"/> |
| • Risk perception                                                                                                          | <input type="radio"/> | <input type="radio"/> | <input type="radio"/> |
| • HOPE+ (Baseline assessment only)                                                                                         | <input type="radio"/> | <input type="radio"/> | <input type="radio"/> |
| If <b>yes</b> , then continue to question 11)                                                                              |                       |                       |                       |
| 2) Patient filled in questionnaire with the help of another person (e.g. formal / informal caregiver) (joint assessment).  | <input type="radio"/> | <input type="radio"/> | <input type="radio"/> |
| • HALEMS                                                                                                                   | <input type="radio"/> | <input type="radio"/> | <input type="radio"/> |
| • IPOS (Neuro-S8)                                                                                                          | <input type="radio"/> | <input type="radio"/> | <input type="radio"/> |
| • HADS                                                                                                                     | <input type="radio"/> | <input type="radio"/> | <input type="radio"/> |
| • Cost booklet                                                                                                             | <input type="radio"/> | <input type="radio"/> | <input type="radio"/> |
| • Risk perception                                                                                                          | <input type="radio"/> | <input type="radio"/> | <input type="radio"/> |
| • HOPE+ (Baseline assessment only)                                                                                         | <input type="radio"/> | <input type="radio"/> | <input type="radio"/> |
| If <b>yes</b> , then continue to question 11)                                                                              |                       |                       |                       |
| 3) Another person (e.g. formal / informal caregiver) filled in questionnaires on behalf of the patient (proxy assessment). | <input type="radio"/> | <input type="radio"/> | <input type="radio"/> |
| If <b>no</b> , then continue to question 7)                                                                                |                       |                       |                       |

- |                                    |                       |                       |                       |
|------------------------------------|-----------------------|-----------------------|-----------------------|
| • HALEMS                           | <input type="radio"/> | <input type="radio"/> | <input type="radio"/> |
| • IPOS (Neuro-S8)                  | <input type="radio"/> | <input type="radio"/> | <input type="radio"/> |
| • HADS                             | <input type="radio"/> | <input type="radio"/> | <input type="radio"/> |
| • Cost booklet                     | <input type="radio"/> | <input type="radio"/> | <input type="radio"/> |
| • Risk perception                  | <input type="radio"/> | <input type="radio"/> | <input type="radio"/> |
| • HOPE+ (Baseline assessment only) | <input type="radio"/> | <input type="radio"/> | <input type="radio"/> |

### Reasons for proxy assessment

- |                                                                                                      | yes                   | no                    |
|------------------------------------------------------------------------------------------------------|-----------------------|-----------------------|
| 4) Patient was too ill (incapacitated by the disease itself or related limitations / complications). | <input type="radio"/> | <input type="radio"/> |
| 5) It was not possible to make an appointment / meet with the patient.                               | <input type="radio"/> | <input type="radio"/> |
| 6) Patient declined. Please specify reasons:                                                         | <input type="radio"/> | <input type="radio"/> |
| a) felt too ill                                                                                      | <input type="radio"/> | <input type="radio"/> |
| b) felt overburdened                                                                                 | <input type="radio"/> | <input type="radio"/> |
| c) lack of time                                                                                      | <input type="radio"/> | <input type="radio"/> |
| d) lack of interest                                                                                  | <input type="radio"/> | <input type="radio"/> |
| e) felt bothered by questions                                                                        | <input type="radio"/> | <input type="radio"/> |
| f) other reasons, please specify: .....                                                              | <input type="radio"/> | <input type="radio"/> |
| .....                                                                                                |                       |                       |

**Please continue to question 11)**

### Reasons why proxy assessment was not possible

- |                                                                                    | yes                   | no                    |
|------------------------------------------------------------------------------------|-----------------------|-----------------------|
| 7) No such person available.                                                       | <input type="radio"/> | <input type="radio"/> |
| 8) Person declined. Please specify reasons:                                        | <input type="radio"/> | <input type="radio"/> |
| a) did not feel competent enough to fill in questionnaire on behalf of the patient | <input type="radio"/> | <input type="radio"/> |
| b) felt overburdened                                                               | <input type="radio"/> | <input type="radio"/> |
| c) lack of time                                                                    | <input type="radio"/> | <input type="radio"/> |
| d) lack of interest                                                                | <input type="radio"/> | <input type="radio"/> |
| e) felt bothered by questions                                                      | <input type="radio"/> | <input type="radio"/> |
| f) other reasons, please specify: .....                                            | <input type="radio"/> | <input type="radio"/> |
| .....                                                                              |                       |                       |

- 9) Patient died.
- If yes,
- Date:   -   -      
D D M M Y Y Y Y
- Place of death:
- a) clinic / hospital
- b) at home
- c) nursing home
- d) hospice
- e) short-term nursing
- f) assisted living
- g) elsewhere, please specify:
- .....

- 10) Consent to participate in study was withdrawn.

### Place of assessment

- |                                    | yes                   | no                    |
|------------------------------------|-----------------------|-----------------------|
| 11) Patient's home                 | <input type="radio"/> | <input type="radio"/> |
| 12) Caregiver's home               | <input type="radio"/> | <input type="radio"/> |
| 13) Patient's and caregiver's home | <input type="radio"/> | <input type="radio"/> |
| 14) Clinic / hospital              | <input type="radio"/> | <input type="radio"/> |
| 15) Nursing home                   | <input type="radio"/> | <input type="radio"/> |
| 16) Hospice                        | <input type="radio"/> | <input type="radio"/> |
| 17) Short-term nursing             | <input type="radio"/> | <input type="radio"/> |

18) Assisted living

19) Elsewhere, please specify: .....

### Time of assessment

**yes no**

20) Questionnaires were completed within the planned time frame.    
If **no**, please specify reasons:

.....

.....

### Completeness

**yes no**

21) Were all questions answered?    
If **no**, please specify reasons:

.....

.....

### Blinding

**yes no**

22) Blinding of the outcome assessor is still given.    
If **no**, please specify reasons:

.....

.....

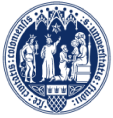

**UNIKLINIK  
KÖLN** Zentrum für  
Palliativmedizin

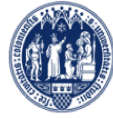

**UNIKLINIK  
KÖLN** Klinik und Poliklinik  
für Neurologie

Compliance form for participation in the study „Communication, Coordination und Security for People with Multiple Sclerosis (COCOS-MS)“

Caregiver ID:

Date: /  - /  - / / /

|                                                       |                                       |          |          |          |          |                                        |
|-------------------------------------------------------|---------------------------------------|----------|----------|----------|----------|----------------------------------------|
| <b>Assessment</b><br><small>(please encircle)</small> | <b>1</b><br><small>(Baseline)</small> | <b>2</b> | <b>3</b> | <b>4</b> | <b>5</b> | <b>6</b><br><small>(Follow-Up)</small> |
|-------------------------------------------------------|---------------------------------------|----------|----------|----------|----------|----------------------------------------|

Questions need to be answered in order, unless indicated otherwise.

**Conduction of assessment**

|                                                                             | yes                   | no                    | partially             |
|-----------------------------------------------------------------------------|-----------------------|-----------------------|-----------------------|
| 1) Questionnaires were completed by caregiver.                              | <input type="radio"/> | <input type="radio"/> | <input type="radio"/> |
| <ul style="list-style-type: none"> <li>• ZBI-12</li> <li>• SF-12</li> </ul> | <input type="radio"/> | <input type="radio"/> | <input type="radio"/> |
| If <b>yes</b> , then continue to question 5)                                | <input type="radio"/> | <input type="radio"/> | <input type="radio"/> |
| 2) Consent to participate in study was withdrawn:                           |                       |                       |                       |
| a) from caregiver                                                           | <input type="radio"/> | <input type="radio"/> |                       |
| b) from patient who is also participating in the study                      | <input type="radio"/> | <input type="radio"/> |                       |
| 3) It was not possible to make an appointment / meet with the caregiver.    | <input type="radio"/> | <input type="radio"/> |                       |
| 4) Caregiver declined. Please specify reasons:                              | <input type="radio"/> | <input type="radio"/> |                       |
| a) was sick                                                                 | <input type="radio"/> | <input type="radio"/> |                       |
| b) felt overburdened                                                        | <input type="radio"/> | <input type="radio"/> |                       |
| c) lack of time                                                             | <input type="radio"/> | <input type="radio"/> |                       |
| d) lack of interest                                                         | <input type="radio"/> | <input type="radio"/> |                       |
| e) felt bothered by questions                                               | <input type="radio"/> | <input type="radio"/> |                       |
| f) other reasons, please specify: .....                                     | <input type="radio"/> | <input type="radio"/> |                       |
| .....                                                                       |                       |                       |                       |

| Place of assessment |  |  |
|---------------------|--|--|
|---------------------|--|--|

|     |                                  | yes                   | no                    |
|-----|----------------------------------|-----------------------|-----------------------|
| 5)  | Patient's home                   | <input type="radio"/> | <input type="radio"/> |
| 6)  | Caregiver's home                 | <input type="radio"/> | <input type="radio"/> |
| 7)  | Patient's and caregiver's home   | <input type="radio"/> | <input type="radio"/> |
| 8)  | Clinic / hospital                | <input type="radio"/> | <input type="radio"/> |
| 9)  | Nursing home                     | <input type="radio"/> | <input type="radio"/> |
| 10) | Hospice                          | <input type="radio"/> | <input type="radio"/> |
| 11) | Respite care                     | <input type="radio"/> | <input type="radio"/> |
| 12) | Assisted living                  | <input type="radio"/> | <input type="radio"/> |
| 13) | Elsewhere, please specify: ..... | <input type="radio"/> | <input type="radio"/> |

| Time of assessment |  |  |
|--------------------|--|--|
|--------------------|--|--|

|     |                                                                                                        | yes                   | no                    |
|-----|--------------------------------------------------------------------------------------------------------|-----------------------|-----------------------|
| 14) | Questionnaires were completed within the planned time frame.<br>If <b>no</b> , please specify reasons: | <input type="radio"/> | <input type="radio"/> |
|     | .....                                                                                                  |                       |                       |
|     | .....                                                                                                  |                       |                       |

**Completeness**

|                                                                            | yes                   | no                    |
|----------------------------------------------------------------------------|-----------------------|-----------------------|
| 15) Were all questions answered?<br>If <b>no</b> , please specify reasons: | <input type="radio"/> | <input type="radio"/> |
| .....                                                                      |                       |                       |
| .....                                                                      |                       |                       |

**Blinding**

|                                                                                                | yes                   | no                    |
|------------------------------------------------------------------------------------------------|-----------------------|-----------------------|
| 16) Blinding of the outcome assessor is still given.<br>If <b>no</b> , please specify reasons: | <input type="radio"/> | <input type="radio"/> |
| .....                                                                                          |                       |                       |
| .....                                                                                          |                       |                       |
